# Supplementary material for: Estimating the relative contribution of parasitic infections and nutrition for anaemia among school-aged children in Kenya: a subnational geostatistical analysis
Source: PubMed Central journal article supplement — BMJ Open. 2013 Feb 22;3(2):e001936. doi: 10.1136/bmjopen-2012-001936 (PMC3586185; doi:10.1136/bmjopen-2012-001936), 2013-02-22
Supplement: bmjopen-2012-001936.draft_revisions.pdf [file bmjopen-2012-001936.draft_revisions.pdf]

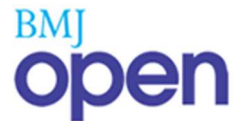

**Estimating the relative contribution of parasitic infections and nutrition for anaemia among school-aged children in Kenya: a subnational geostatistical analysis**

|                                 |                                                                                                                                                                                                                                                                                                                                                                                                                                                                                                                                                     |
|---------------------------------|-----------------------------------------------------------------------------------------------------------------------------------------------------------------------------------------------------------------------------------------------------------------------------------------------------------------------------------------------------------------------------------------------------------------------------------------------------------------------------------------------------------------------------------------------------|
| Journal:                        | <i>BMJ Open</i>                                                                                                                                                                                                                                                                                                                                                                                                                                                                                                                                     |
| Manuscript ID:                  | bmjopen-2012-001936                                                                                                                                                                                                                                                                                                                                                                                                                                                                                                                                 |
| Article Type:                   | Research                                                                                                                                                                                                                                                                                                                                                                                                                                                                                                                                            |
| Date Submitted by the Author:   | 06-Aug-2012                                                                                                                                                                                                                                                                                                                                                                                                                                                                                                                                         |
| Complete List of Authors:       | Pullan, Rachel; London School of Hygiene & Tropical Medicine, Department of Disease Control<br>Gitonga, Carol; Kenya Medical Research Institute-Wellcome Trust Research Programme,<br>Mwandawiro, Charles; Eastern and Southern Africa Centre of International Parasite Control, Kenya Medical Research Institute (KEMRI),<br>Snow, Robert; Kenyan Medical Research Institute/University of Oxford-Wellcome Trust Research Programme, Malaria Public Health & Epidemiology Group<br>Brooker, Simon; London School of Hygiene and Tropical Medicine, |
| <b>Primary Subject Heading</b>: | Epidemiology                                                                                                                                                                                                                                                                                                                                                                                                                                                                                                                                        |
| Secondary Subject Heading:      | Global health                                                                                                                                                                                                                                                                                                                                                                                                                                                                                                                                       |
| Keywords:                       | NUTRITION & DIETETICS, Epidemiology < INFECTIOUS DISEASES, Public health < INFECTIOUS DISEASES, Tropical medicine < INFECTIOUS DISEASES                                                                                                                                                                                                                                                                                                                                                                                                             |
|                                 |                                                                                                                                                                                                                                                                                                                                                                                                                                                                                                                                                     |

SCHOLARONE™  
Manuscripts

1  
2 **Estimating the relative contribution of parasitic infections and nutrition for anaemia**  
3  
4 **among school-aged children in Kenya: a subnational geostatistical analysis**  
5  
6

7 Rachel L Pullan<sup>1</sup>, Carol Gitonga<sup>1,2</sup>, Charles Mwandawiro<sup>3</sup>, Robert W Snow<sup>2,4</sup> and Simon J Brooker<sup>1,2</sup>  
8  
9

10 <sup>1</sup> *London School of Hygiene and Tropical Medicine, London, UK*

11 <sup>2</sup> *Kenya Medical Research Institute-Wellcome Trust Research Programme, Nairobi, Kenya;*

12 <sup>3</sup> *Eastern and Southern Africa Centre of International Parasite Control, Kenya Medical Research Institute*  
13 *(KEMRI), Nairobi, Kenya*

14 <sup>4</sup> *Centre for Tropical Medicine, Nuffield Department of Clinical Medicine, University of Oxford, Oxford, UK*  
15  
16

17  
18 **Correspondence:** [rachel.pullan@lshtm.ac.uk](mailto:rachel.pullan@lshtm.ac.uk); Faculty of Infectious and Tropical Diseases, London School  
19  
20 of Hygiene and Tropical Medicine, Keppel Street, London WC1E 7HT  
21  
22

## Abstract

**Objectives:** To quantify geographical variation in the relative contribution of parasitic infections, socio-economic factors and malnutrition in the aetiology of anaemia among school children across Kenya, thereby providing a rational basis for the targeting of an integrated school health package.

**Design:** Nationally representative cross-sectional survey data were collected using standard protocols. For all included children, data were recorded on haemoglobin concentration and common parasitic infections (*Plasmodium falciparum*, hookworm and schistosomiasis) and socio-economic indicators. Ecological proxies of malnutrition and food security were generated using Demographic and Health Survey and UN Food and Agriculture Organization food security data respectively. Spatially explicit, multilevel models were used to quantify impact upon child haemoglobin concentration.

**Setting:** Randomly selected schools in ecologically diverse settings across Kenya.

**Main outcome measures:** Mean haemoglobin concentration adjusted for infection, nutritional and socio-economic risk factors; associated risk ratios and adjusted Population Attributable Fractions (PAFs) for anaemia, by region.

**Results:** Data were available for 16,941 children in 167 schools; mean Hb was 122.1 g/L and 35.3% of children were anaemic. In multivariate analysis, mean Hb was significantly lower in boys and younger children. Severe malnutrition and interactions between *P. falciparum* and hookworm infections were significantly associated with lower Hb, with greater impacts seen for co-infected children. The contribution of risk factors to anaemia risk varied by province: in 14 year old girls PAFs ranged between 0-27.6% for *P. falciparum*, 0-29.0% for hookworm and 0-18.4% for severe malnutrition.

**Conclusions:** The observed geographical heterogeneity in the burden of anaemia attributable to different aetiological factors has important implications for the rational targeting of anti-anaemia interventions that can be included into an integrated school health programme.

## Article Summary

### Article Focus

- Cross-sectional haematological and parasitological school survey data for the period 2008-2010 in Kenya
- Spatially-explicit, Bayesian multi-level models quantifying impact of infection, nutrition and social risk factors on child haemoglobin concentration and adjusted Population Attributable Fractions for anaemia by province.
- Implications of spatial heterogeneity in underlying haemoglobin status and risk factors for cost-effective geographical targeting of anti-anaemia interventions

### Key messages

For school-aged children living in Kenya:

- *P. falciparum*, hookworm and schistosomes are all significantly associated with lower mean Hb, with the largest impact seen for coinfection with hookworm and *P. falciparum*, emphasising the importance of parasitic infections in the aetiology of anaemia in African school-age populations
- Poor food intake is suggested to be an important contributor to anaemia in school-aged children.
- There is pronounced geographical heterogeneity in the burden of anaemia attributable to these identified risk factors underscoring importance of appropriately targeting interventions

### Strengths and limitations of the study

- Large and uniquely detailed dataset coupled with novel Bayesian modelling framework that allowed for simultaneous quantification of the mean shift in Hb associated with each risk factor, and sub-national risk of anaemia in school-aged children attributable to risk factors.
- Dependence upon cross-sectional design and ecological data limits inference of causality; incorporation of individual, nutritional-related factors and iron status indicators would improve quantification of their involvement.

## Background

Children of school-going age (5-14 years) make up one quarter of the population of sub-Saharan Africa,<sup>(1)</sup> and the proportion of these children attending school has never been higher, in large part due to recent global and national commitments to universal primary education school enrolment.<sup>(2)</sup> Yet many children enrolled in school suffer from poor health and malnutrition and as a result are less likely to attend and complete school or achieve their full educational potential.<sup>(3)</sup> For example, up to 40% of 5-14 year olds are estimated to be anaemic,<sup>(4, 5)</sup> which can affect cognition and learning.<sup>(6, 7)</sup> Anaemia also affects the health of older girls as they reach puberty, potentially impacting upon future motherhood and the nutrition of the next generation of learners.<sup>(8, 9)</sup> Fortunately, a number of simple and cost-effective interventions are available to avert the burden of anaemia, including malaria control,<sup>(10, 11)</sup> deworming,<sup>(12)</sup> iron supplementation<sup>(13, 14)</sup> and school-feeding<sup>(15)</sup> – interventions which are increasingly delivered as part of an integrated school health package.<sup>(16)</sup>

Identifying the optimal combination of school health interventions requires reliable information on both the geographical distribution of anaemia and the relative contribution of different aetiological factors. A previous study of anaemia among preschool children in West Africa employed a geostatistical framework to interpolate estimates of anaemia among children aged 1-4 years collected through demographic health surveys (DHS), whilst incorporating ecological predictions of malaria and helminth infection. Whilst this work helped define the geographical distribution and limits of anaemia in the region it did not quantify spatial variation in the risk attributable to different aetiological factors.<sup>(17)</sup> Here we take advantage of uniquely detailed haematological data collected during a comprehensive, national school health survey conducted across Kenya between 2008 and 2010.<sup>(18)</sup> An initial analysis showed that the relative contribution of *Plasmodium falciparum* varied according to malaria transmission zones.<sup>(19)</sup> We extend this to investigate the relationships between haemoglobin concentration (Hb) and common parasitic infections (including *P. falciparum*, hookworm and schistosomes), socio-economic indicators and proxies of malnutrition and food security for school children across Kenya. We use an innovative Bayesian approach that quantifies the mean shift in Hb associated with each risk factor, which we use to estimate sub-

1 national variation in the risk of anaemia in school-aged children attributable to malnutrition, malaria and  
2  
3  
4 helminths to define targets for integrated packages of school-health interventions.  
5  
6  
7

## 8 **Methods**

### 9 ***School survey data:***

10  
11  
12 This study uses cross-sectional school survey data collected between September 2008 and March 2010  
13  
14 using standard protocols, described elsewhere.<sup>(18, 20)</sup> In brief, 480 government primary schools were  
15  
16 selected to provide a national assessment of malaria and anaemia among school children. In a random  
17  
18 subset of 167 schools stool and urine samples were also collected to assess prevalence and intensity of  
19  
20 helminth infections. At each school, 10 children plus 1 reserve of each sex were randomly selected from  
21  
22 each of classes 2-6 from the children present that day. Selected children were asked to provide a  
23  
24 fingerprick blood sample, which was used to assess haemoglobin (Hb) using a portable photometer  
25  
26 (Haemocue, Angelholm, Sweden) and *Plasmodium* infection in the peripheral blood based on microscopy-  
27  
28 corrected malaria rapid diagnostic test (RDT)<sup>(18)</sup> results. Children in all schools were asked to provide stool  
29  
30 samples which were examined for the eggs of intestinal nematodes (*Ascaris lumbricoides*, *Trichuris*  
31  
32 *trichiura* and hookworm species) and *S. mansoni* using the Kato-Katz method. In schools on the coast,  
33  
34 where *Schistosoma haematobium* is widespread, children were asked to provide urine samples which  
35  
36 were examined by urine filtration. A questionnaire was administered to all pupils to obtain data on  
37  
38 insecticide-treated net ownership and use, history of anthelmintic medication, key socioeconomic  
39  
40 variables, household construction and education of the child's parent/guardian. School locations were  
41  
42 determined using a hand-held Global Positioning System and classified as urban using an updated 2010  
43  
44 urban extents (UE) mask derived from GRUMP.<sup>(21, 22)</sup>  
45  
46  
47  
48  
49  
50

### 51 ***Nutritional proxy data***

52  
53  
54  
55 Anthropometric and food intake data were not available for all of our study population, and we instead  
56  
57  
58  
59  
60  
61  
62  
63  
64  
65  
66  
67  
68  
69  
70  
71  
72  
73  
74  
75  
76  
77  
78  
79  
80  
81  
82  
83  
84  
85  
86  
87  
88  
89  
90  
91  
92  
93  
94  
95  
96  
97  
98  
99  
100  
101  
102  
103  
104  
105  
106  
107  
108  
109  
110  
111  
112  
113  
114  
115  
116  
117  
118  
119  
120  
121  
122  
123  
124  
125  
126  
127  
128  
129  
130  
131  
132  
133  
134  
135  
136  
137  
138  
139  
140  
141  
142  
143  
144  
145  
146  
147  
148  
149  
150  
151  
152  
153  
154  
155  
156  
157  
158  
159  
160  
161  
162  
163  
164  
165  
166  
167  
168  
169  
170  
171  
172  
173  
174  
175  
176  
177  
178  
179  
180  
181  
182  
183  
184  
185  
186  
187  
188  
189  
190  
191  
192  
193  
194  
195  
196  
197  
198  
199  
200  
201  
202  
203  
204  
205  
206  
207  
208  
209  
210  
211  
212  
213  
214  
215  
216  
217  
218  
219  
220  
221  
222  
223  
224  
225  
226  
227  
228  
229  
230  
231  
232  
233  
234  
235  
236  
237  
238  
239  
240  
241  
242  
243  
244  
245  
246  
247  
248  
249  
250  
251  
252  
253  
254  
255  
256  
257  
258  
259  
260  
261  
262  
263  
264  
265  
266  
267  
268  
269  
270  
271  
272  
273  
274  
275  
276  
277  
278  
279  
280  
281  
282  
283  
284  
285  
286  
287  
288  
289  
290  
291  
292  
293  
294  
295  
296  
297  
298  
299  
300  
301  
302  
303  
304  
305  
306  
307  
308  
309  
310  
311  
312  
313  
314  
315  
316  
317  
318  
319  
320  
321  
322  
323  
324  
325  
326  
327  
328  
329  
330  
331  
332  
333  
334  
335  
336  
337  
338  
339  
340  
341  
342  
343  
344  
345  
346  
347  
348  
349  
350  
351  
352  
353  
354  
355  
356  
357  
358  
359  
360  
361  
362  
363  
364  
365  
366  
367  
368  
369  
370  
371  
372  
373  
374  
375  
376  
377  
378  
379  
380  
381  
382  
383  
384  
385  
386  
387  
388  
389  
390  
391  
392  
393  
394  
395  
396  
397  
398  
399  
400  
401  
402  
403  
404  
405  
406  
407  
408  
409  
410  
411  
412  
413  
414  
415  
416  
417  
418  
419  
420  
421  
422  
423  
424  
425  
426  
427  
428  
429  
430  
431  
432  
433  
434  
435  
436  
437  
438  
439  
440  
441  
442  
443  
444  
445  
446  
447  
448  
449  
450  
451  
452  
453  
454  
455  
456  
457  
458  
459  
460  
461  
462  
463  
464  
465  
466  
467  
468  
469  
470  
471  
472  
473  
474  
475  
476  
477  
478  
479  
480  
481  
482  
483  
484  
485  
486  
487  
488  
489  
490  
491  
492  
493  
494  
495  
496  
497  
498  
499  
500  
501  
502  
503  
504  
505  
506  
507  
508  
509  
510  
511  
512  
513  
514  
515  
516  
517  
518  
519  
520  
521  
522  
523  
524  
525  
526  
527  
528  
529  
530  
531  
532  
533  
534  
535  
536  
537  
538  
539  
540  
541  
542  
543  
544  
545  
546  
547  
548  
549  
550  
551  
552  
553  
554  
555  
556  
557  
558  
559  
560  
561  
562  
563  
564  
565  
566  
567  
568  
569  
570  
571  
572  
573  
574  
575  
576  
577  
578  
579  
580  
581  
582  
583  
584  
585  
586  
587  
588  
589  
590  
591  
592  
593  
594  
595  
596  
597  
598  
599  
600  
601  
602  
603  
604  
605  
606  
607  
608  
609  
610  
611  
612  
613  
614  
615  
616  
617  
618  
619  
620  
621  
622  
623  
624  
625  
626  
627  
628  
629  
630  
631  
632  
633  
634  
635  
636  
637  
638  
639  
640  
641  
642  
643  
644  
645  
646  
647  
648  
649  
650  
651  
652  
653  
654  
655  
656  
657  
658  
659  
660  
661  
662  
663  
664  
665  
666  
667  
668  
669  
670  
671  
672  
673  
674  
675  
676  
677  
678  
679  
680  
681  
682  
683  
684  
685  
686  
687  
688  
689  
690  
691  
692  
693  
694  
695  
696  
697  
698  
699  
700  
701  
702  
703  
704  
705  
706  
707  
708  
709  
710  
711  
712  
713  
714  
715  
716  
717  
718  
719  
720  
721  
722  
723  
724  
725  
726  
727  
728  
729  
730  
731  
732  
733  
734  
735  
736  
737  
738  
739  
740  
741  
742  
743  
744  
745  
746  
747  
748  
749  
750  
751  
752  
753  
754  
755  
756  
757  
758  
759  
760  
761  
762  
763  
764  
765  
766  
767  
768  
769  
770  
771  
772  
773  
774  
775  
776  
777  
778  
779  
780  
781  
782  
783  
784  
785  
786  
787  
788  
789  
790  
791  
792  
793  
794  
795  
796  
797  
798  
799  
800  
801  
802  
803  
804  
805  
806  
807  
808  
809  
810  
811  
812  
813  
814  
815  
816  
817  
818  
819  
820  
821  
822  
823  
824  
825  
826  
827  
828  
829  
830  
831  
832  
833  
834  
835  
836  
837  
838  
839  
840  
841  
842  
843  
844  
845  
846  
847  
848  
849  
850  
851  
852  
853  
854  
855  
856  
857  
858  
859  
860  
861  
862  
863  
864  
865  
866  
867  
868  
869  
870  
871  
872  
873  
874  
875  
876  
877  
878  
879  
880  
881  
882  
883  
884  
885  
886  
887  
888  
889  
890  
891  
892  
893  
894  
895  
896  
897  
898  
899  
900  
901  
902  
903  
904  
905  
906  
907  
908  
909  
910  
911  
912  
913  
914  
915  
916  
917  
918  
919  
920  
921  
922  
923  
924  
925  
926  
927  
928  
929  
930  
931  
932  
933  
934  
935  
936  
937  
938  
939  
940  
941  
942  
943  
944  
945  
946  
947  
948  
949  
950  
951  
952  
953  
954  
955  
956  
957  
958  
959  
960  
961  
962  
963  
964  
965  
966  
967  
968  
969  
970  
971  
972  
973  
974  
975  
976  
977  
978  
979  
980  
981  
982  
983  
984  
985  
986  
987  
988  
989  
990  
991  
992  
993  
994  
995  
996  
997  
998  
999  
1000

1 derived from the Kenya 2008-09 Demographic and Health Survey (DHS).<sup>(23, 24)</sup> Anthropometric  
2 measurements were extracted for children  $\leq 5$  years and for women of child-bearing age (ages 15 to 49)  
3 (see Table 1). For children  $\leq 5$  years, the reported proportion consuming food rich in iron (flesh and organ  
4 meat) in the past 24 hours was also extracted. These indicators, which provide a general measure of  
5 nutritional status in the wider community, were geo-located to the centre of each sampling cluster.  
6  
7 Bayesian kriging<sup>(25)</sup> was used to interpolate a distribution of possible values for each indicator to survey  
8 school locations using the Bayesian statistical software WinBUGS version 14.1 (Medical Research Council  
9 Biostatistics Unit and Imperial College London). Mean predicted prevalence values were then categorised  
10 according to WHO-defined cut-off values for severity of malnutrition by prevalence range (Table 1). See  
11 Technical Appendix for further details.  
12  
13  
14  
15  
16  
17  
18  
19  
20  
21  
22  
23  
24  
25

26 Two additional indicators were used to describe general food availability at each school location:  
27 predominant source of livelihood (based on 2010 FAO Livelihood zones<sup>(26, 27)</sup>); and food security  
28 conditions at the time of the survey (based on the FAO Food Insecurity Severity Scale<sup>(27, 28)</sup>). Both  
29 indicators were obtained from the Famine Early Warning System Network (FEWS NET;  
30 <http://www.fews.net>). Information on the intended provision of formal, government-run school-feeding  
31 programmes was abstracted from the Homegrown School Meals Programme (HGSMP) and the Emergency  
32 HGSMP 2010 registers provided by the Kenya Ministry of Education (*personal communication*).  
33  
34  
35  
36  
37  
38  
39  
40  
41  
42  
43

### 44 **Analysis**

45  
46 A schematic summarising the major steps in our analysis strategy is provided in Figure 1. Haemoglobin  
47 levels were adjusted for altitude and individuals were classified as anaemic using age and sex specific cut-  
48 offs.<sup>(29)</sup> Children were classified as having medium/high intensity hookworm infection if infection intensity  
49 exceeded 100 epg, and medium/high intensity *S. haematobium* infection if infection intensity exceeded  
50 500 epg (both representing the top 10<sup>th</sup> percentile). Reported information on ownership of household  
51  
52  
53  
54  
55  
56  
57  
58  
59  
60

1 assets and household construction was used to generate wealth indices using principle component  
2 analysis,<sup>(30)</sup> and resulting scores were divided into quintiles.  
3  
4  
5  
6  
7

8 The initial candidate set of predictor variables for univariate analysis included age, sex, relative socio-  
9 economic status, education-level of the household head, protective behaviours (bednet usage and  
10 deworming) and infection status with hookworm, schistosome and *P. falciparum*, in addition to school-  
11 level ecological covariates including urban/rural location, predicted prevalence of anthropometric  
12 indicators in younger children and women of reproductive age, livelihood zone and food security status  
13 and intended provision of school-feeding. In order to select candidate variables for spatial multivariable  
14 analysis, univariate analysis was undertaken using logistic regression (criteria: Wald test  $P < .1$ ) using Stata  
15 11.1 software (StataCorp). Standard errors were adjusted for dependence between individuals within  
16 schools using a clustered sandwich estimator. Backward-stepwise elimination was then used to generate a  
17 minimum adequate multivariate model; excluded covariates ( $P > .05$ ) were retested in the minimal model  
18 to confirm lack of association.  
19  
20  
21  
22  
23  
24  
25  
26  
27  
28  
29  
30  
31  
32  
33  
34

35 Retained covariates were included in a spatial multivariable Bayesian mixed-effects linear regression  
36 model using WinBUGs 14.1. This model included individual and school-level ecological fixed effects and a  
37 school-level geostatistical random effect (using an isotropic, stationary exponential decay function),<sup>(25)</sup>  
38 thereby incorporating a degree of spatial smoothing. Uncertainty in the predicted prevalence of  
39 anthropometric proxy indicators was incorporated by modelling these covariates as random variables  
40 with a beta distribution, defined using the prediction posterior distribution. At each model realisation,  
41 malnutrition was categorised as either low, medium/high or severe for each school location, according to  
42 Table 1.  
43  
44  
45  
46  
47  
48  
49  
50  
51  
52  
53  
54

55 Given the large observed differences in mean Hb and prevalence of predictors by region and demographic  
56 group, adjusted PAFs for anaemia were estimated for two indicator demographic groups (boys aged 7  
57  
58  
59  
60



1 years, and girls aged 14 years) for each province in Kenya. In brief, at each model realisation we estimated  
2  
3 the prevalence of anaemia in each of the risk groups based upon the posterior mean and standard  
4  
5 deviation of the Hb distribution within each school. These were used to estimate (i) the relative risk of  
6  
7 anaemia for each risk group compared with baseline risk, and (ii) the associated adjusted PAF, as  
8  
9 described by Rockhill *et al* (1998).<sup>(31)</sup> Estimates were subsequently summarised by province. Full  
10  
11 statistical notation of Bayesian geostatistical modelling, PAF and model validation procedures are  
12  
13 presented in Technical Appendix. Model validation using hold out datasets, presented in detail in the  
14  
15 accompanying Technical Appendix, suggest very high degree of correlation at the school level between  
16  
17 observed and expected mean Hb levels ( $R^2 > 0.98$ ), and prevalence of anaemia ( $R^2 > 0.95$ ) suggesting the  
18  
19 approach we used to estimate anaemia prevalence (and associated attributable fractions) was  
20  
21 appropriate.  
22  
23  
24  
25  
26  
27  
28  
29

### 30 Results:

31  
32 Data on Hb, malaria parasitaemia and helminth infection were available for 16,941 children (aged 5-16) in  
33  
34 167 schools (Figure 2). Mean altitude-adjusted Hb concentration was 122.1 g/L, with 35.3% of children  
35  
36 estimated to be anaemic. The spatial distribution of the unadjusted Hb data is presented in Figure 2,  
37  
38 summarised by school. There were significant geographical heterogeneity in mean Hb across the country  
39  
40 (Moran's  $I p < 0.001$ ), with the lowest average levels observed in Coast Province (120.1 g/L) and the highest  
41  
42 in Central Province (134.0 g/L). Univariate analysis suggested that Hb levels increased with age and with  
43  
44 relative socio-economic status, and were significantly lower in individuals infected with *P. falciparum* or  
45  
46 medium/high intensity helminth infections (Table 1). Hb was also significantly lower in areas with  
47  
48 predicted severe malnutrition, although there was no ecological relationship with predicted consumption  
49  
50 of iron rich foods. Univariate analysis also suggests a relationship between Hb and food availability, with  
51  
52 significantly lower Hb levels in children living in very food insecure areas.  
53  
54  
55  
56  
57  
58  
59  
60

### ***Bayesian hierarchical model of haemoglobin***

Table 3 presents a multivariate analysis of factors associated with Hb levels. On average, boys had lower mean Hb compared with girls by 1.53 g/L, and older children tended to have higher Hb levels, increasing 1.08 g/L each yearly age interval. There was strong evidence for a multiplicative negative interaction between infection status and Hb levels, highlighting the health impacts of parasitic infections in school-aged children. Children with medium/high intensity hookworm infection had Hb levels 1.03 g/L lower than uninfected children, those with malaria 3.00 g/L lower and *S. haematobium* infection 1.75 g/L; children co-infected with both malaria and medium/high intensity hookworm infection had Hb levels 5.56 g/L lower than uninfected children.

Proxy measures of nutritional status were also strongly associated with Hb levels. School-children living in areas predicted to have severe prevalence of wasting had Hb levels that were on average 9.74 g/L lower than those living in low risk areas. School-feeding programmes also appear to have been targeted to districts with increased risk of anaemia, although examination of the 95% credible intervals suggests no statistical difference within target districts between mean Hb levels in schools with and without intended provision of formal school-feeding programmes. Perhaps surprisingly, food security at the time of the survey (a qualitative measure that allows adjustment for acute conditions and the impact of seasonality) was not associated with Hb levels in multivariate analysis. Similarly, after accounting for all other factors in the model, relative socio-economic status was not significantly associated with Hb levels.

The random effects variance components from this model indicate that most of the residual variation remains between children within schools: of the total unexplained variability in Hb, 13.8% occurred at the school level, whilst 86.2% occurred between children within schools. Closer examination of the spatial school-level random effect suggests that, after accounting for included predictors, most schools (81%) had similar Hb levels that could not be distinguished statistically (shown in green in Figure 2). There was however some residual spatial clustering of schools with higher/lower than expected Hb levels (foci radii

1 of ~190 km, Table 2) with significantly lower mean Hb levels observed in schools in the far south of Coast  
2 Province and in Nyanza and Western provinces. Interestingly, comparison of observed prevalence of *P.*  
3 *falciparum* and medium/high intensity hookworm suggests that prevalence of both infections was higher  
4 for these schools than for other schools in these provinces (*P. falciparum* Kruskal-Wallis  $p$  0.02;  
5 medium/high intensity hookworm Kruskal-Wallis  $p$  0.01). In contrast, mean Hb levels were significantly  
6 higher for schools in Rift Valley, Central and Eastern provinces  
7  
8  
9  
10  
11  
12  
13

### 14 **Adjusted Population Attributable Risk Fractions**

15  
16  
17 Using the final Bayesian hierarchical model, we estimated for two demographic groups (girls aged 14  
18 years, and boys aged 7 years) the PAF of anaemia due to *P. falciparum*, medium/high intensity hookworm  
19 infection, medium/high intensity *S. haematobium* infection, and acute malnutrition (prevalence of  
20 wasting in under 5s exceeding 15%) for each province in Kenya, adjusting for all other included predictors  
21 (Table 4). Our results suggest that the relative contribution of each risk factor varies considerably by  
22 province. For example, in Coast Province 13% (95% BCI: 4-23%) of anaemia in 14 year old girls attending  
23 school may be attributable to medium/high intensity hookworm, comparing with 6% (95% BCI: 2-10%) to  
24 *P. falciparum* infection and 3.1% (95% BCI: 0-8%) to schistosomiasis. Meanwhile, results suggest that  
25 reduction in acute malnutrition in Coast Province (to <5% wasting in  $\leq$ 5s) would reduce anaemia  
26 prevalence by 19% (95% BCI: 0-38%). This contrasts with Western Province, where the estimated risk of  
27 anaemia attributable to medium and high intensity hookworm is 29% (95% BCI: 1-55%) and to *P.*  
28 *falciparum* 24% (95% BCI 0-41%); no school children in this district are exposed to *S. haematobium* and  
29 acute malnutrition in under 5s is predicted not to exceed 5%. The wide 95% BCIs observed reflect (i) the  
30 smaller sample sizes for provinces other than Coast (given that  $N$  = schools, not individuals), and (ii) the  
31 additional uncertainty surrounding proxies for malnutrition. Trends in PAFs observed for predictors in 7  
32 year old boys mirror those for older girls but are generally lower, a reflection of the lower baseline Hb  
33 levels in this group.  
34  
35  
36  
37  
38  
39  
40  
41  
42  
43  
44  
45  
46  
47  
48  
49  
50  
51  
52  
53  
54  
55  
56  
57  
58  
59  
60

## Discussion

As global commitment and resources for school health and nutrition initiatives grow,<sup>(16)</sup> there is an urgent need to strengthen our understanding of the likely impact of interventions aimed at tackling important health and development outcomes such as anaemia. This requires a detailed understanding of the relative contribution of aetiological factors at policy relevant scales. Here we present a uniquely detailed national analysis of risk factors for anaemia among schoolchildren in 167 schools across Kenya. We introduce a new approach using multilevel linear modelling to provide a detailed description the varying contribution of risk factors by administrative unit (province), whilst fully accounting for spatial variation in underlying mean Hb. Results provide a vital decision-making tool for cost-effective targeting the delivery of integrated, packages of interventions tailored to each province, with the aim of reducing anaemia in schoolchildren.

Our analysis found evidence that *P. falciparum*, hookworm and schistosomes were each significantly associated with lower mean Hb, observations consistent with current knowledge. Such findings corroborate recent results from the Global Burden of Disease study, which suggests that globally for anaemia 10.2% of years lived with a disability (YLD) across all ages could be attributed to hookworm, 17.9% to malaria and 3.4% to schistosomiasis.<sup>(32)</sup> Our analysis provides three additional insights into the epidemiology of anaemia. First, we confirm small-scale studies<sup>(33-37)</sup> that have suggested that coinfection with hookworm and *P. falciparum* may have a multiplicative effect on Hb level – effects which occur across Kenya. Second, we demonstrate pronounced geographical heterogeneity in the burden of anaemia attributable to identified risk factors. Associations for hookworm and *P. falciparum* were most pronounced in Western Province, where results suggest that together these two infections were attributable for close to 53% of anaemia cases in girls aged 14 years. Together, these findings emphasise the importance of parasitic infections in the aetiology of anaemia in school-aged children and underscore current efforts to control helminths and malaria as part of integrated school health programmes.<sup>(38, 39)</sup> The

1 PAFs provided here are useful for translating our findings into numbers that can help policy decision  
2  
3 makers appreciate the potential benefits of carefully targeted programmes tailored to each province that  
4  
5 strike the best balance between dietary interventions, deworming and malaria control.<sup>(17, 40)</sup>  
6  
7  
8  
9

10 Third, whilst acknowledging that we rely on proxy indicators, our results do suggest that poor food intake  
11  
12 is an important contributor to anaemia in school children: the final model indicates that in communities  
13  
14 where acute malnutrition is a severe public health problem (i.e. where wasting in under 5s exceeds 15%),  
15  
16 mean Hb levels in school-aged children are on average 9.7 g/L lower than well nourished communities,  
17  
18 and as such eliminating acute malnutrition as a public health problem could avert close to 20% of anaemia  
19  
20 cases in 14 year old girls. This is consistent with limited evidence from smaller individual-level studies  
21  
22 suggesting an association between under-nutrition and anaemia in school-aged populations.<sup>(41, 42)</sup> Our  
23  
24 results also provide some indication that whilst existing school-feeding programmes in Kenya do appear  
25  
26 to be targeted to those at most need, they are currently ineffective at tackling anaemia in this population.  
27  
28  
29  
30  
31  
32

33 Our spatially explicit hierarchical approach seeks to maximise the usefulness of this observational, cross-  
34  
35 sectional data and results show that whilst much of the between school variation could be explained by  
36  
37 included risk factors, a high degree of variation does still remains within schools. This suggests that there  
38  
39 are individual-level factors beyond those measured that still need to be considered. In addition to  
40  
41 individual iron status or food intake there are a number of candidates. HIV-infection is potential likely to  
42  
43 be a contributor, as even in asymptomatic HIV infected individuals anaemia is a common manifestation.<sup>(43)</sup>  
44  
45 <sup>44)</sup> We were also unable to account for genetic traits such as sickle-cell and other haemoglobinopathies,<sup>(45)</sup>  
46  
47 or for the potential effect of menarche in adolescent girls.<sup>(46)</sup>  
48  
49  
50  
51  
52

53 A number of additional study limitations should also be acknowledged. As we have previously  
54  
55 acknowledged,<sup>(20)</sup> cross-sectional studies such as this are inevitably subject to a number of limitations  
56  
57 including the potential of ecological fallacy, especially when incorporating population-level estimates. We  
58  
59  
60

1 acknowledge that our indicator of school-feeding (inclusion in the government school-feeding registers) is  
2 far from optimal, and the study would have benefitted from detailed individual-level data on iron status  
3 and food intake. In addition, modelled associations are likely to be lower than the true impact, due to  
4 non-systematic measurement error in our infection indicators, which rely on single samples using  
5 standard parasitological diagnosis with <100% sensitivity.<sup>(47, 48)</sup> Despite a robust stratified random  
6 sampling frame, our results may also be subject to some selection bias, as very ill children such as those  
7 with acute infections and severe chronic malnutrition may have been absent on the day of the school  
8 survey and thus not included in the study sample. Neither is the analysis able to account for the impact of  
9 recently cleared infections on current Hb status. Finally, the current results represent a snapshot of the  
10 period 2008-2010 and it is conceivable that seasonality and intervention-related factors may have  
11 confounded results. However, the inclusion of mosquito net use, recent deworming or food security (a  
12 seasonal covariate) in multivariate models did not improve model fits, suggesting that temporal and  
13 control factors were relatively unimportant.

## 31 Conclusions

32 A recent focus on school-child and adolescent health has emphasised the need to develop a deeper  
33 understanding of factors impacting health and development of this population group.<sup>(49-51)</sup> Here we  
34 present a novel two-step process to model Hb levels and then predict associated anaemia prevalence in  
35 different areas of Kenya. Our approach adds considerable value over and above what could be achieved  
36 modelling anaemia directly, and the adopted geostatistical Bayesian framework allows for propagation of  
37 uncertainty associated at each step (including generation of predicted ecological covariates) into the final  
38 confidence limits. Future expansion of this model could look at interpolating existing results to make  
39 predictions in non-surveyed areas, although this would require generation of values for all included  
40 individual-level covariates for each prediction location, increasing prediction uncertainty. Our results  
41 highlight the marked geographical heterogeneity in the burden of anaemia attributable to identified risk  
42 factors in Kenya, which has major implications for effective targeting of packages of school-based  
43  
44  
45  
46  
47  
48  
49  
50  
51  
52  
53  
54  
55  
56  
57  
58  
59  
60

1 interventions. The priority now should be to explore in detail the health and educational impact of  
2  
3 carefully designed integrated infection and nutritional interventions in this age group.  
4  
5  
6  
7

### 8 **Acknowledgements**

9  
10 We are very grateful to all the teachers, parents and especially children who participated in this survey  
11  
12 and to the many facilitators and members of the survey teams who collected the data. The survey work  
13  
14 was supported by the Wellcome Trust UK as part of fellowship support to SJB (#81673) and by the Division  
15  
16 of Malaria Control, Ministry of Public Health and Sanitation through a grant from the Department for  
17  
18 International Development (DfID) through the WHO Kenya Country Office to Dr AM Noor and Dr E Juma.  
19  
20  
21  
22

### 23 **Footnotes**

24  
25 **Contributors** RLP was responsible for designing and conducting analysis, interpretation, drafting and  
26  
27 production of the final manuscript. CG contributed to the survey design, data assembly and cleaning and  
28  
29 contributed to final manuscript. CM and RWS contributed to survey design, interpretation of results and  
30  
31 contributed to final manuscript. SJB provided scientific guidance and contributed to interpretation and  
32  
33 preparation of the final manuscript. All authors read and approved the final manuscript.  
34

35 **Funding** The fieldwork was supported by the Wellcome Trust UK and by the Division of Malaria Control,  
36  
37 Ministry of Public Health and Sanitation. RLP acknowledges support of the Bill & Melinda Gates  
38  
39 Foundation and CWG is supported by a Commonwealth Scholarship from the DfID. SJB is supported by a  
40  
41 Wellcome Trust Senior Fellowship in Basic Biomedical Science (098045) and RWS is supported by a  
42  
43 Wellcome Trust Principal Fellowship (079080).  
44

45 **Competing interests** None.  
46  
47

48 **Data sharing statement:** The school survey dataset used for this analysis is available for download  
49  
50 through the Global Atlas of Helminth Infection ([www.thiswormyworld.org](http://www.thiswormyworld.org)). The WinBUGs statistical code  
51  
52 is available from the corresponding author at [rachel.pullan@lshtm.ac.uk](mailto:rachel.pullan@lshtm.ac.uk).  
53  
54  
55  
56  
57  
58  
59  
60

## References

1. United Nations Department of Economic and Social Affairs. World population prospects, 2010 revision; Available from: <http://esa.Un.Org/unpd/wpp/>.
2. Global Partnership for Education. All children learning: Report 2011. Global Partnership for Education; Available from: <http://allchildrenlearningreport.globalpartnership.org>
3. World Bank. Fresh: Focusing resources on education and school health. A fresh start to improving the quality and equity of education. UNESCO, UNICEF, WHO & World Bank; 2000
4. McLean E, Cogswell M, Egli I, Wojdyla D, de Benoist B. Worldwide prevalence of anaemia, WHO vitamin and mineral nutritional information system, 1993-2005. *Public Health Nutrition*. 2008;12(4):444-454.
5. Best C, Neufingerl N, van Geel L, van den Briel T, Osendarp S. The nutritional status of school-aged children: Why should we care? *Food and Nutrition Bulletin*. 2010;31(3):400-417.
6. Grantham-McGregor S, Ani C. A review of studies on the effect of iron deficiency on cognitive development in children. *Journal of Nutrition*. 2001 Feb;131(2S-2):649S-666S.
7. Fretham SJ, Carlson ES, Georgieff MK. The role of iron in learning and memory. *Advances in Nutrition*. 2011;2(2):112-121.
8. Scholl TO. Iron status during pregnancy: Setting the stage for mother and infant. *American Journal of Clinical Nutrition*. 2005;81(5):1218S-1222S.
9. Dharmalingam A, Navaneetham K, Krishnakumar CS. Nutritional status of mothers and low birth weight in india. *Maternal and Child Health Journal*. 2010;14(2):290-298.
10. Clarke SE, Jukes M, Njagi JK, Khasakhala L, Cundill B, Otido J, et al. Effect of intermittent preventive treatment of malaria on health and education in schoolchildren: A cluster-randomised, double-blind, placebo-controlled trial. *Lancet*. 2008;372(9633):127-138.
11. Leenstra T, Phillips-Howard PA, Kariuki SK, Hawley WA, Alaii JA, Rosen DH, et al. Permethrin-treated bed nets in the prevention of malaria and anemia in adolescent schoolgirls in western kenya. *American Journal of Tropical Medicine and Hygiene*. 2003;68(S86-S93).
12. Smith JL, Brooker S. The impact of hookworm infection and deworming on anaemia in non-pregnant populations: A quantitative update. *Tropical Medicine and International Health*. 2010;15(7):776-795.
13. Leenstra T, Kariuki SK, Kurtis JD, Oloo AJ, Kager PA, ter Kuile FO. The effect of weekly iron and vitamin a supplementation on hemoglobin levels and iron status in adolescent schoolgirls in western kenya. *European Journal of Clinical Nutrition*. 2009;63(2):173-182.
14. Gera T, Sachdev HP, Nestel P. Effects of iron supplementation on physical performance in children and adolescents: Systematic review of randomized controlled trials. *Indian Pediatrics*. 2007;44:15-24.
15. Bundy DAP, Burbano C, Grosh M, Gelli A, Jukes M, Drake L. *Rethinking school feeding: Social safety nets, child development and the education sector*. The World Bank: New York; 2009.
16. Bundy DAP. *Rethinking school health: A key component of education for all*. Washington: The World Bank; 2012.
17. Soares Magalhães RJ, Clements ACA. Mapping the risk of anaemia in preschool-age children: The contribution of malnutrition, malaria, and helminth infections in West Africa. *PLoS Medicine*. 2011;8(6):e1000438.
18. Gitonga C, Karanja P, Kihara J, Mwanje M, Juma E, Snow R, et al. Implementing school malaria surveys in kenya: Towards a national surveillance system. *Malaria Journal*. 2010;9(1):306.
19. Gitonga CW, Edwards T, Karanja PN, Noor AM, Snow RW, Brooker SJ. *Plasmodium* infection, anaemia and mosquito net use among school children across different settings in Kenya. *Tropical Medicine and International Health*. 2012;17(7):858-870.
20. Brooker S, Pullan RL, Gitonga CW, Ashton RA, Kolaczinski JH, Kabatereine NB, et al. *Plasmodium*-helminth coinfection and its sources of heterogeneity across east africa. *Journal of Infectious Diseases* 2012;205(5):841-852.
21. Balk DL, Deichmann U, Yetman G, Pozzi F, Hay SI, Nelson A. Determining global population distribution: Methods, applications and data. *Advances in Parasitology*. 2006;62:119-156.



- 1  
2  
3  
4  
5  
6  
7  
8  
9  
10  
11  
12  
13  
14  
15  
16  
17  
18  
19  
20  
21  
22  
23  
24  
25  
26  
27  
28  
29  
30  
31  
32  
33  
34  
35  
36  
37  
38  
39  
40  
41  
42  
43  
44  
45  
46  
47  
48  
49  
50  
51  
52  
53  
54  
55  
56  
57  
58  
59  
60
22. Balk D, Pozzi F, Yetman G, Deichmann U, Nelson A. The distribution of people and the dimension of place: Methodologies to improve the global estimation of urban extents. Urban Remote Sensing Conference; 2004; Available at: <http://www.iussp.org/Activities/wgc-urb/balk.pdf>
  23. Kenya National Bureau of Statistics, Measure DHS. Kenya: Dsh, 2008-09 - final report. Calverton, Maryland, USA: Measure DHS, ICF Macro; 2010
  24. Measure DHS. Kenya 2008-09 DHS data. Available from: <http://www.measuredhs.com>
  25. Diggle P, Moyeed R, Tawn J. Model-based geostatistics (with discussion). *Applied Statistics*. 1998;47:299-350.
  26. FEWSNET. Famine early warning system network (FEWSNET) livelihood zone map for Kenya. FEWSNET and USAID; 2011
  27. Grillo J, Holt J. Application of the livelihood zone maps and profiles for food security analysis and early warning: USAID FEWSNET; 2009
  28. FEWSNET. Famine early warning system network (FEWSNET) Kenya archive: Food security update. FEWSNET and USAID; 2011
  29. WHO. Iron deficiency anaemia: Assessment, prevention and control. A guide for programme managers. Geneva: World Health Organisation; 2001
  30. Filmer D, Pritchett LH. Estimating wealth effects without expenditure data--or tears: An application to educational enrollments in states of india. *Demography*. 2001;38(1):115-32.
  31. Rockhill B, Newman B, Weinberg C. Use and misuse of population attributable fractions. *American Journal of Public Health*. 1998;88(1):15-19.
  32. Jasrasaria J, Murray CJL, Naghavi M. Global Burden of Disease 2010 Estimate: Strategy Report for Anaemia Envelope. [Unpublished report]. *Personal Communication* 2012.
  33. Brooker S, Akhwale WS, Pullan R, Estambale B, Clarke S, Snow RW, et al. Epidemiology of *Plasmodium*-helminth coinfection in Africa: Potential impact on anaemia and prospects for combining control. *American Journal of Tropical Medicine & Hygiene*. 2007;77:88-98.
  34. Pullan R, Brooker S. The health impact of polyparasitism in humans: Are we under-estimating the burden of parasitic diseases? *Parasitology*. 2008:1-12.
  35. Nkuo-Akenji TK, Chi PC, Cho JF, Ndamukong KKJ, Sumbele I. Malaria and helminth co-infection in children living in a malaria endemic setting of Mount Cameroon and predictors of anaemia. *Journal of Parasitology*. 2006;92(6):1191-1195.
  36. Midzi N, Mtapuri-Zinyowera S, Mappingure MP, Sangweme D, Chirehwa MT, Brouwer KC, et al. Consequences of polyparasitism on anaemia among primary school children in Zimbabwe. *Acta Trop*. 2010;115:103-111.
  37. Ezeamama EE, McGarvey ST, Acosta LP, Zierler S, Manalo DL, Wu H-W, et al. The synergistic effect of concomitant schistosomiasis, hookworm, and trichuris infections on children's anemia burden. *PLoS Negl Trop Dis*. 2008;2(6):e245.
  38. Bundy DAP, Shaeffer S, Jukes M, Beegle K, Gillespie A, Drake L, et al. School based health and nutrition programs. *Chapter 58 in "Disease Control Priorities for Developing Countries"*. 2006.
  39. Brooker S, Clarke S, Snow RW, Bundy DAP. Malaria in african schoolchildren: Options for control. *Transactions of the Royal Society of Tropical Medicine and Hygiene*. 2008;102(4):304-305.
  40. Rowe AK, Powell KE, Flanders WD. Why population attributable fractions can sum to more than one. *American Journal of Preventative Medicine*. 2004;26:243-249.
  41. Anumudu C, Adolami M, Igwe C, Nwagwu M, Keshinro O. Nutritional anaemia and malaria in pre-school and school-aged children. 2008;1(11-17).
  42. Daboné C, Delise HF, Receveur O. Poor nutritional status of schoolchildren in urban and peri-urban areas of Ouagadougou (Burkina Faso). *Nutrition Journal*. 2011;10:34.
  43. Calis JC, van Hensbroek MB, de Haan RJ, Moons P, Brabin BJ, Bates I. HIV-associated anemia in children: A systematic review from a global perspective. *AIDS*. 2008;22(10):1099-1112.
  44. Levine AM, Berhane K, Masri-Lavine L, Sanchez M, Young M, Augenbraun M, et al. Prevalence and correlates of anemia in a large cohort of HIV-infected women: Women's interagency HIV study. *Journal of Acquired Immune Deficiency Syndrome*. 2001;26:28-35.
  45. Tolentino K, Friedman JF. An update on anaemia in less developed countries. *American Journal of Tropical Medicine and Hygiene*. 2007;77:44-51.

- 1  
2  
3  
4  
5  
6  
7  
8  
9  
10  
11  
12  
13  
14  
15  
16  
17  
18  
19  
20  
21  
22  
23  
24  
25  
26  
27  
28  
29  
30  
31  
32  
33  
34  
35  
36  
37  
38  
39  
40  
41  
42  
43  
44  
45  
46  
47  
48  
49  
50  
51  
52  
53  
54  
55  
56  
57  
58  
59  
60
46. Leenstra T, Kakiuki SK, Kurtis JD, Oloo AJ, Kager PA, ter Kuile FO. Prevalence and severity of anaemia and iron deficiency: Cross-sectional studies in adolescent schoolgirls in western Kenya. *European Journal of Clinical Nutrition*. 2004;58(4):681-691.
47. Booth M, Vounatsou P, N'Goran E K, Tanner M, Utzinger J. The influence of sampling effort and the performance of the kato-katz technique in diagnosing *Schistosoma mansoni* and hookworm co-infections in rural Cote d'Ivoire. *Parasitology*. 2003;127(Pt 6):525-31.
48. Okell LC, Ghani AC, Lyons E, Drakeley C. Submicroscopic infection in *Plasmodium falciparum* endemic populations: A systematic review and meta-analysis. *Journal of Infectious Disease*. 2009;15(10):1509-1517.
49. World Bank. World development report 2007: Development and the next generation. Washington: The World Bank
50. Little AW, Green A. Successful globalisation, education and sustainable development. *International Journal of Education and Development*. 2009;29:166-174.
51. Sawyer SM, Afifi RA, Bearinger LH, Blakemore S-J, Dick B, Ezech AC, et al. Adolescence: A foundation for future health. *The Lancet*. 2012;379(9826):1630-1640.
52. Kleinbaum DG, Kupper LL, Morgenstern H. Epidemiological research. Belmont, CA: Lifetime Learning Publications; 1982. p. 163.

1  
2  
3  
4  
5  
6  
7  
8  
9  
10  
11  
12  
13  
14  
15  
16  
17  
18  
19  
20  
21  
22  
23  
24  
25  
26  
27  
28  
29  
30  
31  
32  
33  
34  
35  
36  
37  
38  
39  
40  
41  
42  
43  
44  
45  
46  
47  
48  
49  
50  
51  
52  
53  
54  
55  
56  
57  
58  
59  
60

**Figure legends:**

**Figure 1 Schematic of adopted analysis strategy.** The dual aim of this analysis strategy was to (i) model the impact of risk factors on children's haemoglobin (Hb) levels, and (ii) estimate the adjusted Population Attributable Risk Fraction (PAF) associated with important, modifiable risk factors. This process was repeated at each realisation of the Bayesian hierarchical model to provide posterior mean estimates and credible intervals for all parameters of relevance.

**Figure 2 Spatial distribution of mean haemoglobin distribution across Kenya, by school.** HB is adjusted for altitude, population density (persons / km<sup>2</sup>) is shown for reference.

**Figure 3 Graph of spatial random-effect (school-level residual) from the multivariate, Bayesian hierarchical model for Hb.** Each point represents one school; the posterior mean is shown by the dot and the 95% BCI are represented by the error bars. The horizontal straight line in the middle of the graph represents the overall mean of the residuals, which are zero centred. Inset shows the school locations, shaded by the value of the school-level residual.

For peer review only

## Tables:

**Table 1** Definition of included anthropometric indicators, and population-based cut-off values for severity of malnutrition, as defined by the World Health Organization.

| Anthropometric Measurement |                                                      | Severity of malnutrition (prevalence range for < 6 years) |                      |                    |
|----------------------------|------------------------------------------------------|-----------------------------------------------------------|----------------------|--------------------|
|                            |                                                      | Low severity                                              | Medium/high severity | Very high severity |
| Stunting                   | Height-for-age Z-score > -2 SD                       | <20%                                                      | 20-40%               | >40%               |
| Wasting                    | weight-for-height Z-score > -2 SD                    | <5%                                                       | 5-15%                | >15%               |
| Underweight                | weight-for-age <i>or</i> BMI-for-age Z-score > -2 SD | <10%                                                      | 10-30%               | >30%               |

**Table 2** Mean Hb concentration according to infection status, nutritional proxies and other characteristics in 16,941 children aged 5-16 years (univariate analysis).

| Variable                                                        | Data type and source          | Children No (%) | Mean Hb shift, g/L (SE) | p      |
|-----------------------------------------------------------------|-------------------------------|-----------------|-------------------------|--------|
| <b>Sex</b>                                                      |                               |                 |                         |        |
| Female                                                          | Individual – KHS              | 8,314 (49.1)    | (vs. female)            |        |
| Male                                                            | Individual – KHS              | 8,627 (50.9)    | - 1.36 (0.28)           | <0.001 |
| Age (in years)                                                  | Individual – KHS              | -               | + 0.89 (0.11)           | <0.001 |
| <b>Socio-economic indicators</b>                                |                               |                 |                         |        |
| Educated household head <sup>1</sup>                            | Individual – KHS              | 8,333 (49.2)    | + 0.82 (0.41)           | 0.05   |
| Household owns a mobile phone                                   | Individual – KHS              | 10,065 (59.4)   | + 1.42 (0.40)           | <0.001 |
| <b>SES quintile</b>                                             |                               |                 |                         |        |
| Lowest                                                          | Individual – KHS              | 3,272 (20.4)    | (vs. lowest)            |        |
| Mid (quintiles 2-4)                                             |                               | 9,926 (61.8)    | + 2.35 (0.50)           | <0.001 |
| Highest                                                         |                               | 2,854 (17.8)    | + 3.07 (0.82)           | <0.001 |
| Urban location                                                  | School-level – digital UE map | 1,237 (7.3)     | 1.56 (1.52)             | 0.3    |
| <b>Current infections</b>                                       |                               |                 |                         |        |
| Malaria parasitaemic                                            | Individual – KHS              | 607 (3.6)       | -3.36 (0.77)            | <0.001 |
| Med/high intensity hookworm (>100 epg)                          | Individual – KHS              | 931 (5.5)       | -2.81 (0.69)            | <0.001 |
| Med/high intensity <i>S. haematobium</i> (>500 epg)             | Individual – KHS              | 799 (4.7)       | -3.81 (1.02)            | <0.001 |
| Usually sleeps under a net                                      | Individual – KHS              | 9,763 (57.6)    | - 1.78 (0.52)           | 0.001  |
| Taken anthelmintic in previous 6 months                         | Individual – KHS              | 7,494 (44.2)    | + 1.24 (0.48)           | 0.01   |
| <b>Nutritional proxies</b>                                      |                               |                 |                         |        |
| <b>Wasting in under 5s (%) <sup>2</sup></b>                     |                               |                 |                         |        |
| Under 5%                                                        | Ecological – interpolated     | 4,027 (23.8)    | (vs <5%)                |        |
| 5-15%                                                           | from 2008 DHS                 | 10,257 (60.6)   | -5.58 (1.04)            | <0.001 |
| Over 15%                                                        |                               | 2,657 (15.7)    | -8.14 (1.21)            | <0.001 |
| <b>Low BMI in adult women (%) <sup>3</sup></b>                  |                               |                 |                         |        |
| Under 20%                                                       | Ecological – interpolated     | 12,867 (76.0)   | (vs. <20%)              |        |
| Over 20%                                                        | from 2008 DHS                 | 4,072 (24.0)    | -1.98 (0.80)            | 0.01   |
| <b>Consumption iron rich foods in under 5s (%) <sup>4</sup></b> |                               |                 |                         |        |
| Under 25%                                                       | Ecological – interpolated     | 14,572 (86.0)   | (vs. <25%)              |        |
| Over 25%                                                        | from 2008 DHS                 | 2,369 (14.0)    | + 1.07 (1.24)           | 0.4    |
| <b>School-feeding (SF) status: <sup>5</sup></b>                 |                               |                 |                         |        |
| Not a SF district                                               | School-level – MoE registers  | 3,690 (21.8)    | (vs. not SF dist)       |        |
| SF district – no programme in school                            |                               | 8,417 (49.7)    | -7.34 (1.08)            | <0.001 |
| SF district – programme in school                               |                               | 4,834 (28.5)    | -4.80 (1.19)            | <0.001 |
| <b>Generalised livelihood zone <sup>6</sup></b>                 |                               |                 |                         |        |
| Mixed farming                                                   |                               | 3,295 (19.5)    | (vs. mixed)             |        |
| Pastoral and agro-pastoral                                      | Ecological – FEWSNET          | 4,991 (29.5)    | + 1.11 (1.45)           | 0.4    |
| Riverine and fishing                                            |                               | 641 (3.8)       | + 2.08 (2.42)           | 0.4    |
| Medium potential farming                                        |                               | 4,073 (24.0)    | - 2.93 (1.13)           | 0.02   |
| High potential farming                                          |                               | 3,941 (23.3)    | + 1.37 (2.14)           | 0.2    |
| <b>Food security status <sup>7</sup></b>                        |                               |                 |                         |        |
| Generally food secure                                           | Ecological – FEWSNET          | 2,756 (16.3)    | (vs. secure)            |        |
| Moderately food insecure                                        |                               | 7,755 (45.8)    | -3.20 (1.27)            | 0.01   |
| Highly food insecure                                            |                               | 6,048 (35.7)    | - 6.17 (1.25)           | <0.001 |
| Extremely food insecure                                         |                               | 382 (2.3)       | - 5.12 (1.52)           | 0.001  |

KSH; Kenya School Health survey (conducted 2008-2010). DHS; Kenya Demographic Health Survey conducted 2008/2009. MoE; Kenya Ministry of Education. FEWSNET; Famine early warning system network. SE; standard error.

<sup>1</sup> household head educated to primary complete or above (reported).

<sup>2,3,4</sup> Interpolated from Kenya 2008/2009 DHS survey

<sup>2</sup> school included in either the Homegrown School Meals Programme (HGSM) or Emergency HGSM 2010 registers

<sup>6</sup> based on the USAID/FEWSNET Generalised Livelihood Zone 2010 Classification for Kenya

<sup>7</sup> based on the USAID/FEWSNET Food Insecurity Severity Scale for the quarter corresponding to the KSH survey date.

**Table 3** Bayesian hierarchical multivariate regression model for haemoglobin levels.

| Variable                                            | Mean Hb shift (g/L) | 95% BCI / SD    |
|-----------------------------------------------------|---------------------|-----------------|
| Baseline haemoglobin                                | 117.3               | (113.9, 120.5)  |
| Sex (male)                                          | -1.53               | (-1.94, -1.13)  |
| Age (in years)                                      | +1.08               | (+0.99, +1.17)  |
| SES quintile (vs. quintiles 2-4)                    |                     |                 |
| lowest                                              | -0.56               | (-1.14, +0.02)  |
| highest                                             | 0.25                | (-0.31, +0.86)  |
| Med/high intensity <i>S. haematobium</i> (>500 epg) | -1.75               | (-2.92, -0.60)  |
| Med/high intensity hookworm (>100 epg)              | -1.03               | (-2.00, -0.02)  |
| Malaria parasitaemic                                | -3.00               | (-4.29, -1.68)  |
| Med/high hookworm – malaria co-infection            | -5.56               | (-8.64, -2.67)  |
| Wasting in under 5s (vs <5% prevalence)             |                     |                 |
| 5-15%                                               | -4.39               | (-6.56, -2.09)  |
| >15%                                                | -9.74               | (-12.16, -7.45) |
| School-feeding (SF) status:                         |                     |                 |
| SF district – no programme in school                | -2.14               | (-4.76, +0.46)  |
| SF district – programme in school                   | -2.78               | (-5.43, -0.21)  |
| <b>Random effect terms</b>                          |                     |                 |
| Individual $\sigma^2$                               | 183.6               | (2.02)          |
| Spatial $\sigma^2$ (school-level)                   | 29.5                | (7.93)          |
| Range of spatial correlation (km)                   | 194                 | (99,318)        |

**Table 4: Predicted adjusted population attributable risk fractions for key predictors across Kenya.** Estimates are based on the predicted numbers anaemic in each risk group given by the mean and individual-level standard deviations at each realisation of the Bayesian multivariate model for Hb, and are shown for two demographic groups by Province.

| Population Attributable Risk fractions by Province, % (95% BCI) |            |                     |                   |                   |                   |                     |
|-----------------------------------------------------------------|------------|---------------------|-------------------|-------------------|-------------------|---------------------|
|                                                                 | Central    | Coast               | Eastern           | Nyanza            | Rift Valley       | Western             |
| <b>14 year old girls:</b>                                       |            |                     |                   |                   |                   |                     |
| Observed prevalence of anaemia                                  | 3.3        | 37.3                | 34.7              | 30.8              | 19.4              | 25.0                |
| <b>PAF for:</b>                                                 |            |                     |                   |                   |                   |                     |
| Med/high intensity hookworm                                     | <i>n/a</i> | 13.0<br>(3.7, 23.1) | 5.9<br>(0, 12.5)  | 8.2<br>(0, 30.0)  | 5.0<br>(0, 12.5)  | 29.0<br>(1.4, 55.1) |
| Malaria                                                         | <i>n/a</i> | 5.8<br>(2.0, 10.4)  | <i>n/a</i>        | 27.6<br>(0, 49.1) | <i>n/a</i>        | 23.6<br>(0, 40.9)   |
| Schistosomiasis                                                 | <i>n/a</i> | 3.1<br>(0, 0.08)    | <i>n/a</i>        | <i>n/a</i>        | <i>n/a</i>        | <i>n/a</i>          |
| Acute malnutrition <sup>a</sup>                                 | <i>n/a</i> | 18.5<br>(0, 37.9)   | 18.4<br>(0, 73.0) | <i>n/a</i>        | 16.0<br>(0, 52.5) | <i>n/a</i>          |
| <b>7 year old boys:</b>                                         |            |                     |                   |                   |                   |                     |
| Observed prevalence of anaemia                                  | 5.0        | 43.3                | 23.2              | 43.2              | 22.4              | 19.2                |
| <b>PAF for:</b>                                                 |            |                     |                   |                   |                   |                     |
| Med/high intensity hookworm                                     | <i>n/a</i> | 5.6<br>(1.0, 10.3)  | <i>n/a</i>        | 11.0<br>(0, 21.6) | 3.4<br>(0, 6.6)   | 13.5<br>(0, 27.5)   |
| Malaria                                                         | <i>n/a</i> | 1.5<br>(0.3, 6.1)   | <i>n/a</i>        | 14.3<br>(0, 32.0) | <i>n/a</i>        | 15.8<br>(0, 28.1)   |
| Schistosomiasis                                                 | <i>n/a</i> | 0<br>(0, 5.5)       | <i>n/a</i>        | <i>n/a</i>        | <i>n/a</i>        | <i>n/a</i>          |
| Acute malnutrition <sup>a</sup>                                 | <i>n/a</i> | 16.4<br>(0, 33.5)   | 16.4<br>(0, 67.1) | <i>n/a</i>        | 14.1<br>(0, 45.9) | <i>n/a</i>          |

<sup>a</sup> Exposure to “acute malnutrition”, prevalence of wasting in under 5s exceeds 5%  
*n/a* – no children are exposed (i.e. prevalence of predictor is zero in this demographic group)

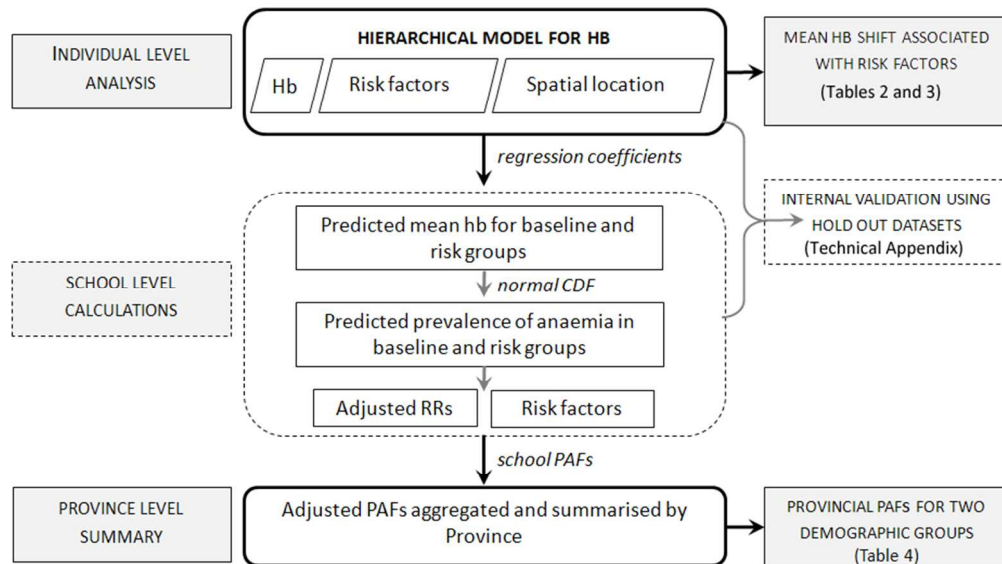

Figure 1. Schematic of adopted analysis strategy. The dual aim of this analysis strategy was to (i) model the impact of risk factors on children's haemoglobin (Hb) levels, and (ii) estimate the adjusted Population Attributable Risk Fraction (PAF) associated with important, modifiable risk factors. This process was repeated at each realisation of the Bayesian hierarchical model to provide posterior mean estimates and credible intervals for all parameters of relevance.



1  
2  
3  
4  
5  
6  
7  
8  
9  
10  
11  
12  
13  
14  
15  
16  
17  
18  
19  
20  
21  
22  
23  
24  
25  
26  
27  
28  
29  
30  
31  
32  
33  
34  
35  
36  
37  
38  
39  
40  
41  
42  
43  
44  
45  
46  
47  
48  
49  
50  
51  
52  
53  
54  
55  
56  
57  
58  
59  
60

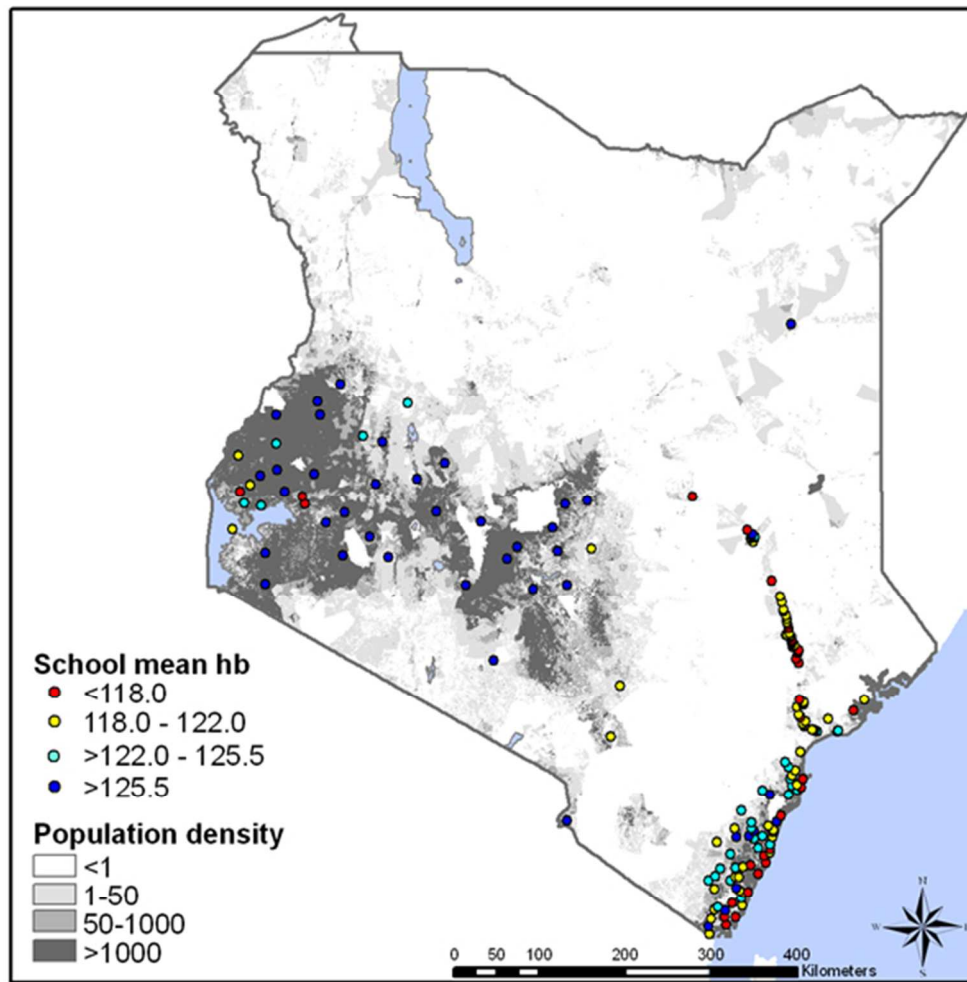

Figure 2 Spatial distribution of mean haemoglobin distribution across Kenya, by school. HB is adjusted for altitude, population density (persons / km<sup>2</sup>) is shown for reference.

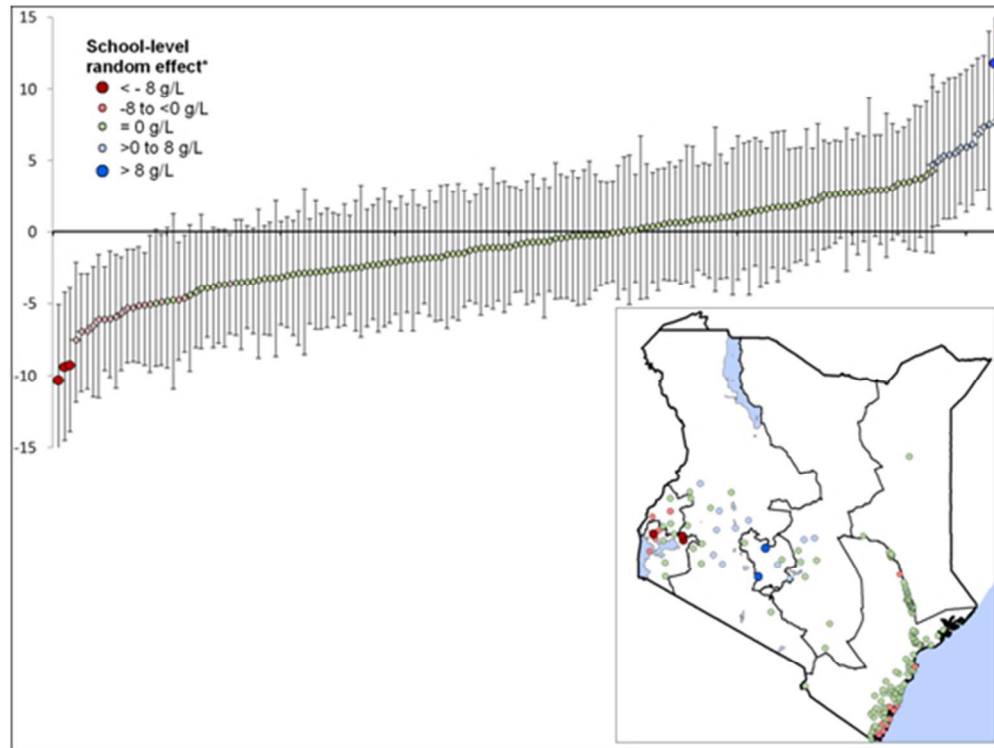

Figure 3. Graph of spatial random-effect (school-level residual) from the multivariate, Bayesian hierarchical model for Hb. Each point represents one school; the posterior mean is shown by the dot and the 95% BCI are represented by the error bars. The horizontal straight line in the middle of the graph represents the overall mean of the residuals, which are zero centred. Inset shows the school locations, shaded by the value of the school-level residual.

## SUPPLEMENTARY TECHNICAL APPENDIX

### Estimating the relative contribution of parasitic infections and nutrition for anaemia among school-aged children in Kenya: a subnational geostatistical analysis

Model fit for all Bayesian estimation was carried out in WinBUGs 1.4.1 (Imperial College London, and MRC, London, UK). Semi-variogram analysis was conducted in R, and all other descriptive statistical analysis and data management were carried out in Stata 11.0 software (StataCorp)

#### Bayesian Kriging of Nutritional Proxy Data

Proxy data for macro-nutritional status in school-aged children were derived from the Kenya 2008-09 Demographic and Health Survey (DHS). This dataset includes anthropometric measurements for 5,470 children aged under 6 years and 7,548 women of child-bearing age (ages 15 to 49). These were chosen to provide a general indication of the degree of malnutrition prevalent in the communities where school-children were surveyed. As DHS clusters rarely coincide with the location of surveyed schools (see Figure S1), it was first necessary to interpolate cluster-level prevalence to school locations using a weighted moving average approach (kriging). In order to provide a realistic account of uncertainty in both the predicted prevalence and the covariance functions used to define weighting, thus providing a range of potential prevalence values, this was embedded in a Bayesian framework using a simple binomial model structure.

The numbers of examined ( $n_i$ ) and positive ( $Y_i$ ) individuals for each anthropometric indicator in cluster  $i$  ( $i=1, \dots, N$ ) were modelled as binomial variates in the form:

$$Y_i \sim \text{Binomial}(n_i, p_i)$$

$$\text{logit}(p_i) = \alpha + u_i$$

1 where  $\alpha$  is the global mean prevalence and  $u_i$  a geostatistical random effect modelled using an isotropic,  
 2 stationary exponential decay function:  $f(d_{ab}; \phi) = \exp[-(\phi d_{ab})]$  where  $d_{ab}$  is the straight-line  
 3 distance between cluster locations a and b, and  $\phi$  is the rate of decline of spatial correlation. A non-  
 4 distance between cluster locations a and b, and  $\phi$  is the rate of decline of spatial correlation. A non-  
 5 informative normal prior was used for  $\alpha$ , the prior distribution of  $\phi$  was uniform with upper and lower  
 6 bounds set at 0.05 and 50 and the precision of  $u_i$  was given non-informative gamma distribution.  
 7  
 8 Following a burn-in of 10,000 iterations, the model was run for a further 10,000 iterations with thinning  
 9 every ten iterations, during which predictions were stored.  
 10  
 11  
 12  
 13  
 14  
 15  
 16  
 17  
 18  
 19  
 20  
 21  
 22  
 23  
 24  
 25  
 26  
 27  
 28  
 29  
 30  
 31  
 32  
 33  
 34  
 35  
 36  
 37  
 38  
 39  
 40  
 41  
 42  
 43  
 44  
 45  
 46  
 47  
 48  
 49  
 50  
 51  
 52  
 53  
 54  
 55  
 56  
 57  
 58  
 59  
 60

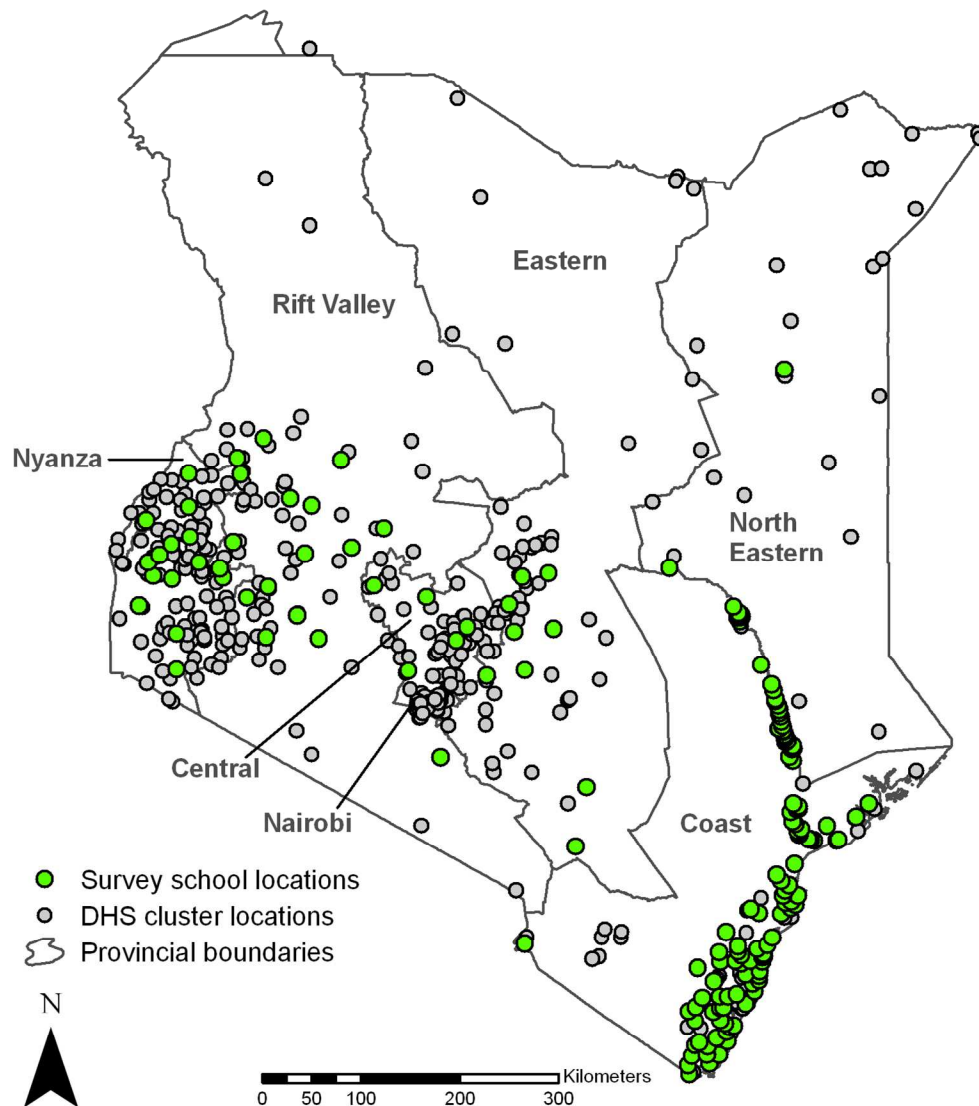

**Figure S1: Location of 167 school surveys and 400 DHS cluster sites across Kenya.** School survey data was collected between 2008-2010, and DHS data between 2008-2009. Provincial boundaries are shown for reference.

**Table S1:** Summary of results from Bayesian kriging of anthropometric indicator data collected during 2008-2009 Kenya DHS survey.

| Anthropometric Indicator                                     | Province      | Mean observed prevalence at DHS clusters, % (range) | Mean predicted prevalence at school survey sites, % (range) |
|--------------------------------------------------------------|---------------|-----------------------------------------------------|-------------------------------------------------------------|
| Wasting (in children < 5 yrs)                                | Central       | 3.3 (0, 25.0)                                       | 4.1 (3.9, 4.7)                                              |
|                                                              | Coast         | 8.5 (0, 35.3)                                       | 10.5 (4.8, 22.8)                                            |
|                                                              | Eastern       | 7.2 (0, 35.3)                                       | 5.1 (4.1, 6.4)                                              |
|                                                              | North Eastern | 12.6 (0, 33.3)                                      | 19.0 (12.7, 22.1)                                           |
|                                                              | Nyanza        | 2.1 (0, 11.8)                                       | 2.5 (2.0, 3.7)                                              |
|                                                              | Rift Valley   | 4.9 (0, 21.1)                                       | 4.1 (2.5, 9.1)                                              |
|                                                              | Western       | 2.0 (0, 23.1)                                       | 2.3 (1.9, 3.6)                                              |
| Low BMI (in women 15-49 yrs)                                 | Central       | 8.5 (0, 4.0)                                        | 9.8 (5.6, 19.0)                                             |
|                                                              | Coast         | 11.7 (0, 44.4)                                      | 16.8 (7.2, 28.5)                                            |
|                                                              | Eastern       | 16.8 (0, 47.6)                                      | 13.6 (5.5, 23.9)                                            |
|                                                              | North Eastern | 27.6 (6.2, 52.9)                                    | 21.0 (16.3, 31.4)                                           |
|                                                              | Nyanza        | 7.4 (0, 31.3)                                       | 7.2 (4.6, 9.7)                                              |
|                                                              | Rift Valley   | 14.8 (0, 55.0)                                      | 11.8 (5.6, 22.3)                                            |
|                                                              | Western       | 7.4 (0, 21.7)                                       | 8.2 (7.1, 9.3)                                              |
| Consumed iron rich foods in past 24 hours (children < 5 yrs) | Central       | 14.8 (0, 45.5)                                      | 17.7 (9.1, 25.0)                                            |
|                                                              | Coast         | 16.2 (0, 55.0)                                      | 17.5 (6.8, 31.4)                                            |
|                                                              | Eastern       | 16.3 (0, 50.0)                                      | 18.1 (16.0, 20.7)                                           |
|                                                              | North Eastern | 15.3 (0, 60.7)                                      | 9.3 (5.9, 15.6)                                             |
|                                                              | Nyanza        | 19.2 (0, 55.6)                                      | 21.4 (13.9, 27.7)                                           |
|                                                              | Rift Valley   | 17.3 (0, 55.6)                                      | 17.2 (7.5, 23.8)                                            |
|                                                              | Western       | 31.7 (0, 69.2)                                      | 28.3 (24.2, 35.3)                                           |

As can be seen from Table S1, observed prevalence of each indicator in the DHS dataset varied considerably within each Province. This is reflected in part by the range of predicted values shown for the school survey sites, although as geostatistical models tend to regress towards the mean the range in predicted values is considerably less. As under- and over-prediction are unlikely to be biased, this suggests that true association between proxies of malnutrition and hb levels in school-aged children are likely to be underestimated.

**Bayesian hierarchical model of haemoglobin**

For this model, haemoglobin level for each child  $i$  ( $i = 1, \dots, N$ ) in school  $j$  ( $j = 1, \dots, N$ ) is considered a normal variable outcome  $Y_{ij}$  in the form:

$$Y_{i,j} \sim \text{Normal}(\mu_{i,j}, \sigma^2)$$

$$\mu_{i,j} = \alpha + \sum_{k=1}^K \beta_k X_{i,j,k} + \sum_{l=1}^L \beta_l X_j + \beta_f u_j + \beta_g v_j + w_j$$

where  $\alpha$  is the intercept,  $\sum_{k=1}^K \beta_k X_{i,t,k}$  the matrix of individual-level covariates,  $\sum_{l=1}^L \beta_l X_j$  the matrix of school-level covariates,  $u_j$  is considered a dummy variable labelled  $u_j=1$  when prevalence of wasting is predicted to be medium/high severity (5-15%) and  $v_j$  a dummy variable labelled  $v_j=1$  when prevalence of wasting is predicted to be extremely high (>15%) and  $w_j$  is a geostatistical random effect modelled using an isotropic, stationary exponential decay function:  $f(d_{ab}; \phi) = \exp[-(\phi d_{ab})]$  where  $d_{ab}$  is the straight-line distance between pairs of school locations  $a$  and  $b$ , and  $\phi$  is the rate of decline of spatial correlation. Non-informative priors were used for  $\alpha$  and the coefficients (normal prior with mean 0 and precision 1 x 106), the prior distribution of  $\phi$  was uniform with upper and lower bounds set at 1 and 50 and the precision of  $v_j$  was given a non-informative gamma distribution. Values of  $u_j$  and  $v_j$  at each model iteration are defined by a random variable  $Z_j$ , which is given an informative beta prior defined using the posterior mean and standard deviation of predicted prevalence of wasting (described above):

$$Z_j \sim \text{Beta}(\alpha_j, \beta_j)$$

$$0.05 > Z_j > 0.15, \quad u_j=1$$

$$0.15 > Z_j > 0.15, \quad v_j=1$$

Following a burn-in of 9,000 iterations, the values for the intercept and coefficients were stored for 1,000 iterations and model convergence was assessed using diagnostic tests for convergence and by visually inspecting the time series plots. Convergence was successfully achieved after 10,000, and the model was

run for a further 10,000 iterations with thinning every ten iterations, during which prediction locations were stored.

Model output therefore consisted of samples from the posterior distribution hb levels for individuals and summarised by school (mean Hb).

### Model adjusted Population Attributable Risk Fractions (PAFs)

In general, analysis of adjusted PAFs for binary outcomes such as anaemia rely on using the adjusted odds ratios (ORs) resulting from binomial GLMs. Whilst regional PAFs can be estimated using this approach based on the spatial distribution of each risk factor by region, it cannot take into account spatial variation in the underlying haemoglobin levels of resident children and thus assumes the impact of each risk factor is constant. For this reason, we chose to use a two step process that explicitly considers variation in underlying haemoglobin levels to estimate PAFs for anaemia by Province across Kenya, as outlined below.

At each realisation of the Bayesian hierarchical model for haemoglobin, the mean hb level ( $\mu_j$ ) was estimated at each school for a baseline group (7 year old boys and 14 year old girls, in socio-economic quantiles 2-4) and for each risk group included in Table 4 (main text), including school-level covariates (SF status) and the geostatistical random error term ( $w_j$ ). The normal cumulative distribution function (CDF) was then used to estimate the prevalence of anaemia (i.e. the proportion of children with hb levels lower than age- and sex-standardised cut-offs) for baseline and risk groups based on predicted  $\mu_j$  and the modelled within-school standard deviation  $\sigma^2$ , and the adjusted relative risk (RR) for each risk factor estimated. In order to produce internally valid estimates when using adjusted RRs, the method proposed by Kelinbaum *et al*<sup>(52)</sup> (see<sup>(31)</sup> for discussion) was used to estimate the adjusted PAFs:

$$PAF = \sum_{i=0}^k pd_i \left( \frac{RR_i - 1}{RR_i} \right)$$

where  $pd_i$  is the proportion of cases falling into the  $i$ th exposure level, and is calculated as the observed school-level prevalence in either boys aged 6-8 years or girls aged 13-15, and  $RR_i$  is the relative risk the  $i$ th

1 exposure level with the unexposed group. School-level PAFs were then aggregated and summarised by  
 2 Province. Model output therefore consisted of samples from the posterior distribution of Province mean  
 3 PAFs for each risk factor.  
 4  
 5  
 6  
 7  
 8  
 9

### 10 **Model Validation**

11  
 12 To assess the predictive performance of the final model of Hb, and associated predicted prevalence of Hb,  
 13 hold-out validation data subsets were generated by random division of the data into quintiles. The  
 14 Bayesian geostatistical model was then trained on four subsets whilst simultaneously predicting  
 15 haemoglobin for the fifth, excluded subset. This was repeated for each subset, giving and observed and  
 16 predicted Hb value for all surveyed individuals. The ability of the model to predict known mean Hb (and  
 17 associated prevalence of anaemia) was assessed by three validation statistics: mean prediction error  
 18 (which provides a measure of the bias of the predictor); absolute mean prediction error (which provides a  
 19 measure of the accuracy of the predictor); and the correlation coefficient (providing a measure of  
 20 association between observed and predicted Hb values).  
 21  
 22  
 23  
 24  
 25  
 26  
 27  
 28  
 29  
 30  
 31  
 32  
 33  
 34

35 Results of this model validation process are shown below in Table S2. When summarised by school, there  
 36 was a very high degree of correlation between observed and expected mean Hb. Mean error and absolute  
 37 mean error of the anaemia predictions was -6%, suggesting that the model consistently over-predicted  
 38 prevalence. At an individual level the model was less successful, on average producing a 10 g/L  
 39 discrepancy between predicted and observed Hb levels. This difference between school and individual  
 40 level predictive validity is reflective of the large residual variation between individuals within schools  
 41 indicated by the model (Table 2).  
 42  
 43  
 44  
 45  
 46  
 47  
 48  
 49  
 50

51 **Table S2:** Measures of correlation, bias and accuracy of Bayesian hierarchical regression models at individual and school  
 52 levels.

| 53 Outcome           | 54 Mean error | 55 Absolute mean error | 56 Correlation coefficient |
|----------------------|---------------|------------------------|----------------------------|
| 57 Individual-level: |               |                        |                            |
| 58 Hb level, g/L     | - 0.005       | + 10.15                | 0.392                      |
| 59 Anaemia           | + 0.042       | + 0.364                | 0.298                      |
| 60 School-level:     |               |                        |                            |
| Mean Hb, g/L         | - 1.74        | +1.79                  | 0.982                      |



1 Prevalence of anaemia, % - 0.061 +0.065 0.951

---

2  
3  
4  
5  
6  
7  
8  
9  
10  
11  
12  
13  
14  
15  
16  
17  
18  
19  
20  
21  
22  
23  
24  
25  
26  
27  
28  
29  
30  
31  
32  
33  
34  
35  
36  
37  
38  
39  
40  
41  
42  
43  
44  
45  
46  
47  
48  
49  
50  
51  
52  
53  
54  
55  
56  
57  
58  
59  
60

For peer review only



**Estimating the relative contribution of parasitic infections and nutrition for anaemia among school-aged children in Kenya: a subnational geostatistical analysis**

|                                 |                                                                                                                                                                                                                                                                                                                                                                                                                                                                                                                                                     |
|---------------------------------|-----------------------------------------------------------------------------------------------------------------------------------------------------------------------------------------------------------------------------------------------------------------------------------------------------------------------------------------------------------------------------------------------------------------------------------------------------------------------------------------------------------------------------------------------------|
| Journal:                        | <i>BMJ Open</i>                                                                                                                                                                                                                                                                                                                                                                                                                                                                                                                                     |
| Manuscript ID:                  | bmjopen-2012-001936.R1                                                                                                                                                                                                                                                                                                                                                                                                                                                                                                                              |
| Article Type:                   | Research                                                                                                                                                                                                                                                                                                                                                                                                                                                                                                                                            |
| Date Submitted by the Author:   | 22-Jan-2013                                                                                                                                                                                                                                                                                                                                                                                                                                                                                                                                         |
| Complete List of Authors:       | Pullan, Rachel; London School of Hygiene & Tropical Medicine, Department of Disease Control<br>Gitonga, Carol; Kenya Medical Research Institute-Wellcome Trust Research Programme,<br>Mwandawiro, Charles; Eastern and Southern Africa Centre of International Parasite Control, Kenya Medical Research Institute (KEMRI),<br>Snow, Robert; Kenyan Medical Research Institute/University of Oxford-Wellcome Trust Research Programme, Malaria Public Health & Epidemiology Group<br>Brooker, Simon; London School of Hygiene and Tropical Medicine, |
| <b>Primary Subject Heading</b>: | Epidemiology                                                                                                                                                                                                                                                                                                                                                                                                                                                                                                                                        |
| Secondary Subject Heading:      | Global health, Haematology (incl blood transfusion), Nutrition and metabolism                                                                                                                                                                                                                                                                                                                                                                                                                                                                       |
| Keywords:                       | NUTRITION & DIETETICS, Epidemiology < INFECTIOUS DISEASES, Public health < INFECTIOUS DISEASES, Tropical medicine < INFECTIOUS DISEASES                                                                                                                                                                                                                                                                                                                                                                                                             |
|                                 |                                                                                                                                                                                                                                                                                                                                                                                                                                                                                                                                                     |

1  
2 **Estimating the relative contribution of parasitic infections and nutrition for anaemia**  
3  
4 **among school-aged children in Kenya: a subnational geostatistical analysis**  
5  
6

7 Rachel L Pullan<sup>1</sup>, Carol Gitonga<sup>1,2</sup>, Charles Mwandawiro<sup>3</sup>, Robert W Snow<sup>2,4</sup> and Simon J Brooker<sup>1,2</sup>  
8  
9

10 <sup>1</sup> *London School of Hygiene and Tropical Medicine, London, UK*

11 <sup>2</sup> *Kenya Medical Research Institute-Wellcome Trust Research Programme, Nairobi, Kenya;*

12 <sup>3</sup> *Eastern and Southern Africa Centre of International Parasite Control, Kenya Medical Research Institute*  
13 *(KEMRI), Nairobi, Kenya*

14 <sup>4</sup> *Centre for Tropical Medicine, Nuffield Department of Clinical Medicine, University of Oxford, Oxford, UK*  
15  
16  
17

18 **Correspondence:** [rachel.pullan@lshtm.ac.uk](mailto:rachel.pullan@lshtm.ac.uk); Faculty of Infectious and Tropical Diseases, London School  
19  
20  
21 of Hygiene and Tropical Medicine, Keppel Street, London WC1E 7HT  
22  
23  
24  
25  
26  
27  
28  
29  
30  
31  
32  
33  
34  
35  
36  
37  
38  
39  
40  
41  
42  
43  
44  
45  
46  
47  
48  
49  
50  
51  
52  
53  
54  
55  
56  
57  
58  
59  
60

## Abstract

**Objectives:** To quantify geographical variation in the relative contribution of parasitic infections, socio-economic factors and malnutrition in the aetiology of anaemia among school children across Kenya, thereby providing a rational basis for the targeting of an integrated school health package.

**Design:** Nationally representative cross-sectional survey data were collected using standard protocols. For all included children, data were recorded on haemoglobin concentration and common parasitic infections (*Plasmodium falciparum*, hookworm and schistosomes) and socio-economic indicators. Ecological proxies of malnutrition and food security were generated using Demographic and Health Survey and UN Food and Agriculture Organization food security data respectively. Spatially explicit, multilevel models were used to quantify impact upon child haemoglobin concentration.

**Setting:** Randomly selected schools in ecologically diverse settings across Kenya.

**Main outcome measures:** Mean haemoglobin concentration adjusted for infection, nutritional and socio-economic risk factors; associated risk ratios and adjusted Population Attributable Fractions (PAFs) for anaemia, by region.

**Results:** Data were available for 16,941 children in 167 schools; mean Hb was 122.1 g/L and 35.3% of children were anaemic. In multivariate analysis, mean Hb was significantly lower in boys and younger children. Severe malnutrition and interactions between *P. falciparum* and hookworm infections were significantly associated with lower Hb, with greater impacts seen for co-infected children. The contribution of risk factors to anaemia risk varied by province: in 14 year old girls PAFs ranged between 0-27.6% for *P. falciparum*, 0-29.0% for hookworm and 0-18.4% for severe malnutrition.

**Conclusions:** The observed geographical heterogeneity in the burden of anaemia attributable to different aetiological factors has important implications for the rational targeting of anti-anaemia interventions that can be included into an integrated school health programme.

## Article Summary

### Article Focus

- Cross-sectional haematological and parasitological school survey data for the period 2008-2010 in Kenya
- Spatially-explicit, Bayesian multi-level models quantifying impact of infection, nutrition and social risk factors on child haemoglobin concentration and adjusted Population Attributable Fractions for anaemia by province.
- Implications of spatial heterogeneity in underlying haemoglobin status and risk factors for cost-effective geographical targeting of school-based anti-anaemia interventions, including deworming, malaria control and school feeding.

### Key messages

For school-aged children living in Kenya:

- *P. falciparum*, hookworm and schistosomes are all significantly associated with lower mean Hb, with the largest impact seen for coinfection with hookworm and *P. falciparum*, emphasising the importance of parasitic infections in the aetiology of anaemia in African school-age populations
- Poor food intake is suggested to be an important contributor to anaemia in school-aged children.
- There is pronounced geographical heterogeneity in the burden of anaemia attributable to these identified risk factors underscoring importance of appropriately targeting interventions

### Strengths and limitations of the study

- Large and uniquely detailed dataset coupled with novel Bayesian modelling framework that allowed for simultaneous quantification of the mean shift in Hb associated with each risk factor, and sub-national risk of anaemia in school-aged children attributable to risk factors.
- Dependence upon cross-sectional design and ecological data limits inference of causality; incorporation of individual, nutritional-related factors and iron status indicators would improve quantification of their involvement.

## Background

Children of school-going age (5-14 years) make up one quarter of the population of sub-Saharan Africa,<sup>1</sup> and the proportion of these children attending school has never been higher, in large part due to recent global and national commitments to universal primary education school enrolment.<sup>2</sup> Yet many children enrolled in school suffer from poor health and malnutrition and as a result are less likely to attend and complete school or achieve their full educational potential.<sup>3</sup> For example, up to 40% of 5-14 year olds are estimated to be anaemic,<sup>4,5</sup> which can affect cognition and learning.<sup>6,7</sup> Anaemia also affects the health of older girls as they reach puberty, potentially impacting upon future motherhood and the nutrition of the next generation of learners.<sup>8,9</sup> Fortunately, a number of simple and cost-effective interventions are available to avert the burden of anaemia, including malaria control,<sup>10,11</sup> deworming,<sup>12</sup> iron supplementation<sup>13,14</sup> and school-feeding<sup>15</sup> – interventions which are increasingly delivered as part of an integrated school health package.<sup>16</sup>

Identifying the optimal combination of school health interventions requires reliable information on both the geographical distribution of anaemia and the relative contribution of different aetiological factors. A previous study of anaemia among preschool children in West Africa employed a geostatistical framework to interpolate estimates of anaemia among children aged 1-4 years collected through demographic health surveys (DHS), whilst incorporating ecological predictions of malaria and helminth infection. Whilst this work helped define the geographical distribution and limits of anaemia in the region it did not quantify spatial variation in the risk attributable to different aetiological factors.<sup>17</sup> Here we take advantage of uniquely detailed haematological data collected during a comprehensive, national school health survey conducted across Kenya between 2008 and 2010.<sup>18</sup> An initial analysis showed that the relative contribution of *Plasmodium falciparum* to anaemia varied according to malaria transmission zones.<sup>19</sup> We extend this to investigate the relationships between haemoglobin concentration (Hb) and common parasitic infections (including *P. falciparum*, hookworm and schistosomes), socio-economic indicators and proxies of malnutrition and food security for school children across Kenya. We use an innovative Bayesian approach that quantifies the mean shift in Hb associated with each risk factor, which we use to estimate

1 sub-national variation in the risk of anaemia in school-aged children attributable to malnutrition, malaria  
2  
3 and helminths to define targets for integrated packages of school-health interventions.  
4  
5  
6  
7

## 8 **Methods**

### 9 ***School survey data:***

10  
11  
12  
13  
14 This study uses cross-sectional school survey data collected between September 2008 and March 2010  
15  
16 using standard protocols, described elsewhere.<sup>18, 20</sup> In brief, 480 government primary schools were  
17  
18 selected to provide a national assessment of malaria and anaemia among school children. In a random  
19  
20 subset of 167 schools, stool and urine samples were also collected to assess prevalence and intensity of  
21  
22 helminth infections. At each school, 10 children plus 1 reserve of each sex were randomly selected from  
23  
24 each of classes 2-6 from the children present that day. This captures children aged 4 to 16, although 80%  
25  
26 of included children were aged between 8 and 13 years. Selected children were asked to provide a  
27  
28 fingerprick blood sample, which was used to assess haemoglobin (Hb) using a portable photometer  
29  
30 (Haemocue, Angelholm, Sweden) and *Plasmodium* infection in the peripheral blood based on microscopy-  
31  
32 corrected malaria rapid diagnostic test (RDT)<sup>18</sup> results, whereby slides were subsequently read for all RDT  
33  
34 positives. Children in all schools were asked to provide stool samples which were examined for the eggs of  
35  
36 intestinal nematodes (*Ascaris lumbricoides*, *Trichuris trichiura* and hookworm species) and *S. mansoni*  
37  
38 using the Kato-Katz method. In schools on the coast, where *Schistosoma haematobium* is widespread,  
39  
40 children were asked to provide urine samples which were examined by urine filtration. A questionnaire  
41  
42 was administered to all pupils to obtain data on insecticide-treated net ownership and use, history of  
43  
44 anthelmintic medication, key socioeconomic variables, household construction and education of the  
45  
46 child's parent/guardian. School locations were determined using a hand-held Global Positioning System  
47  
48 and classified as urban using an updated 2010 urban extents (UE) mask derived from GRUMP.<sup>21, 22</sup>  
49  
50  
51  
52  
53  
54

### 55 ***Nutritional proxy data***

1 Anthropometric and food intake data were not available for all of our study population, and we instead  
2  
3 relied on ecological measures. Proxy data for macro-nutritional status in school-aged children were  
4  
5 derived from the Kenya 2008-09 Demographic and Health Survey (DHS).<sup>23, 24</sup> Anthropometric  
6  
7 measurements were extracted for children  $\leq 5$  years and for women of child-bearing age (ages 15 to 49)  
8  
9 (see Table 1). For children  $\leq 5$  years, the reported proportion consuming food rich in iron (flesh and organ  
10  
11 meat) in the past 24 hours was also extracted. These indicators, which provide a general measure of  
12  
13 nutritional status in the wider community, were geo-located to the centre of each sampling cluster.  
14  
15 Bayesian kriging<sup>25</sup>, a geostatistical interpolation method that accounts for the error introduced by  
16  
17 estimating the semivariogram model (a function of the variability in outcome against the distance  
18  
19 separating observation points), was used to interpolate a distribution of possible values for each indicator  
20  
21 to survey school locations. This was done by incorporating the full posterior distribution of the Bayesian  
22  
23 semivariogram model, estimated using the Bayesian statistical software WinBUGS version 14.1 (Medical  
24  
25 Research Council Biostatistics Unit and Imperial College London). Mean predicted prevalence values were  
26  
27 then categorised according to WHO-defined cut-off values for severity of malnutrition by prevalence  
28  
29 range (Table 1). See Technical Appendix for further details.  
30  
31  
32  
33  
34  
35

36 Two additional indicators were used to describe general food availability at each school location:  
37  
38 predominant source of livelihood (based on 2010 FAO Livelihood zones<sup>26, 27</sup>); and food security conditions  
39  
40 at the time of the survey (based on the FAO Food Insecurity Severity Scale<sup>27, 28</sup>). Both indicators were  
41  
42 obtained from the Famine Early Warning System Network (FEWS NET; <http://www.fews.net>). Information  
43  
44 on the intended provision of formal, government-run school-feeding programmes was abstracted from  
45  
46 the Homegrown School Meals Programme (HGSMP) and the Emergency HGSMP 2010 registers provided  
47  
48 by the Kenya Ministry of Education (*personal communication*).  
49  
50  
51  
52  
53  
54

### 55 **Analysis**

56  
57  
58  
59  
60



1 A schematic summarising the major steps in our analysis strategy is provided in Figure 1. Haemoglobin  
2 levels were adjusted for altitude and individuals were classified as anaemic using age and sex specific cut-  
3 offs.<sup>29</sup> Children were classified as having medium/high intensity hookworm infection if infection intensity  
4 exceeded 100 epg, and medium/high intensity *S. haematobium* infection if infection intensity exceeded  
5 500 epg (both representing the top 10<sup>th</sup> percentile). Reported information on ownership of household  
6 assets and household construction was used to generate wealth indices using principle component  
7 analysis,<sup>30</sup> and resulting scores were divided into quintiles.

8  
9  
10  
11  
12  
13  
14  
15  
16  
17  
18  
19 The initial candidate set of predictor variables for univariate analysis included age, sex, relative socio-  
20 economic status, education-level of the household head, protective behaviours (bednet usage and  
21 deworming) and infection status with hookworm, schistosome and *P. falciparum*, in addition to school-  
22 level ecological covariates including urban/rural location, predicted prevalence of anthropometric  
23 indicators in younger children and women of reproductive age, livelihood zone and food security status  
24 and intended provision of school-feeding. In order to select candidate variables for spatial multivariable  
25 analysis, univariate analysis was undertaken using logistic regression (criteria: Wald test  $P < .1$ ) using Stata  
26 11.1 software (StataCorp). Standard errors were adjusted for dependence between individuals within  
27 schools using a clustered sandwich estimator.<sup>31</sup> Backward-stepwise elimination was then used to generate  
28 a minimum adequate multivariate model; excluded covariates ( $P > .05$ ) were retested in the minimal  
29 model to confirm lack of association. Basic age-sex interaction terms were also investigated, but there  
30 was insufficient evidence that these improved the overall fit of the model.

31  
32  
33  
34  
35  
36  
37  
38  
39  
40  
41  
42  
43  
44  
45  
46  
47 Retained covariates were included in a spatial multivariable Bayesian mixed-effects linear regression  
48 model using WinBUGs 14.1. This model included individual and school-level ecological fixed effects and a  
49 school-level geostatistical random effect (using an isotropic, stationary exponential decay function),<sup>25</sup>  
50 thereby incorporating a degree of spatial smoothing. Uncertainty in the predicted prevalence of  
51 anthropometric proxy indicators was incorporated by modelling these covariates as random variables

1 with a beta distribution, defined using the prediction posterior distribution. At each model realisation,  
2  
3 malnutrition was categorised as either low, medium/high or severe for each school location, according to  
4  
5 Table 1.  
6  
7  
8  
9

10 Given the large observed differences in mean Hb and prevalence of predictors by region and demographic  
11  
12 group, adjusted Population Attributable Fractions (PAFs) for anaemia were estimated for two indicator  
13  
14 demographic groups (boys aged 7 years, and girls aged 14 years) for each province in Kenya. In brief, at  
15  
16 each model realisation we estimated the prevalence of anaemia in each of the risk groups based upon the  
17  
18 posterior mean and standard deviation of the Hb distribution within each school. These were used to  
19  
20 estimate (i) the relative risk of anaemia for each risk group compared with baseline risk, and (ii) the  
21  
22 associated adjusted PAF, as described by Rockhill *et al* (1998).<sup>32</sup> Estimates were subsequently  
23  
24 summarised by province. Full statistical notation of Bayesian geostatistical modelling, PAF and model  
25  
26 validation procedures are presented in Technical Appendix. Model validation using hold out datasets,  
27  
28 presented in detail in the accompanying Technical Appendix, suggest very high degree of correlation at  
29  
30 the school level between observed and expected mean Hb levels ( $R^2 > 0.98$ ), and prevalence of anaemia  
31  
32 ( $R^2 > 0.95$ ) suggesting the approach we used to estimate anaemia prevalence (and associated attributable  
33  
34 fractions) was appropriate.  
35  
36  
37  
38  
39  
40  
41  
42  
43

#### 44 **Results:**

45  
46 Data on Hb, malaria parasitaemia and helminth infection were available for 16,941 children (aged 5-16) in  
47  
48 167 schools (Figure 2). Mean altitude-adjusted Hb concentration was 122.1 g/L, with 35.3% of children  
49  
50 estimated to be anaemic. The spatial distribution of the unadjusted Hb data is presented in Figure 2,  
51  
52 summarised by school. There were significant geographical heterogeneity in mean Hb across the country  
53  
54 (Moran's  $I$   $p < 0.001$ ), with the lowest average levels observed in Coast Province (120.1 g/L) and the highest  
55  
56 in Central Province (134.0 g/L). Univariate analysis suggested that Hb levels increased with age and with  
57  
58  
59  
60

1 relative socio-economic status, and were significantly lower in individuals infected with *P. falciparum* or  
2  
3 medium/high intensity helminth infections (Table 1). Hb was also significantly lower in areas with  
4  
5 predicted severe malnutrition, although there was no ecological relationship with predicted consumption  
6  
7 of iron rich foods. Univariate analysis also suggests a relationship between Hb and food availability, with  
8  
9 significantly lower Hb levels in children living in very food insecure areas.  
10

### 11 ***Bayesian hierarchical model of haemoglobin***

12  
13  
14  
15  
16  
17 Table 3 presents a multivariate analysis of factors associated with Hb levels. On average, boys had lower  
18  
19 mean Hb compared with girls by 1.53 g/L (95% BCI: 1.13-1.94 g/L), and older children tended to have  
20  
21 higher Hb levels, increasing 1.08 g/L (95% BCI: 0.99-1.17 g/L) each yearly age interval. There was strong  
22  
23 evidence for a multiplicative negative interaction between infection status and Hb levels, highlighting the  
24  
25 health impacts of parasitic infections in school-aged children. Children with medium/high intensity  
26  
27 hookworm infection had Hb levels 1.03 g/L (95% BCI: 0.02-2.00 g/L) lower than uninfected children, those  
28  
29 with *P. falciparum* 3.00 g/L (95% BCI: 1.68-4.29 g/L) lower and *S. haematobium* infection 1.75 g/L (95%  
30  
31 BCI: 0.60-2.92 g/L); children co-infected with both *P. falciparum* and medium/high intensity hookworm  
32  
33 infection had Hb levels 5.56 g/L (95% BCI: 2.67-8.64 g/L) lower than uninfected children.  
34  
35  
36  
37  
38  
39

40 Proxy measures of nutritional status were also strongly associated with Hb levels. School-children living in  
41  
42 areas predicted to have severe prevalence of wasting had Hb levels that were on average 9.74 g/L (95%  
43  
44 BCI: 7.45-12.16 g/L) lower than those living in low risk areas. School-feeding programmes also appear to  
45  
46 have been targeted to districts with increased risk of anaemia, although examination of the 95% credible  
47  
48 intervals suggests no statistical difference within target districts between mean Hb levels in schools with  
49  
50 and without intended provision of formal school-feeding programmes. Perhaps surprisingly, food security  
51  
52 at the time of the survey (a qualitative measure that allows adjustment for acute conditions and the  
53  
54 impact of seasonality) was not associated with Hb levels in multivariate analysis. Similarly, after  
55  
56  
57  
58  
59  
60

1 accounting for all other factors in the model, relative socio-economic status was not significantly  
2 associated with Hb levels.  
3  
4  
5  
6  
7

8  
9 The random effects variance components from this model indicate that most of the residual variation  
10 remains between children within schools: of the total unexplained variability in Hb, 13.8% occurred at the  
11 school level, whilst 86.2% occurred between children within schools. Closer examination of the spatial  
12 school-level random effect suggests that, after accounting for included predictors, most schools (81%) had  
13 similar Hb levels that could not be distinguished statistically (shown in green in Figure 3). There was  
14 however some residual spatial clustering of schools with higher/lower than expected Hb levels (foci radii  
15 of ~190 km, Table 2) with significantly lower mean Hb levels observed in schools in the far south of Coast  
16 Province and in Nyanza and Western provinces (Figure 3). Interestingly, comparison of observed  
17 prevalence of *P. falciparum* and medium/high intensity hookworm suggests that prevalence of both  
18 infections was higher for these schools than for other schools in these provinces (*P. falciparum* Kruskal-  
19 Wallis  $p$  0.02; medium/high intensity hookworm Kruskal-Wallis  $p$  0.01). In contrast, mean Hb levels were  
20 significantly higher for schools in Rift Valley, Central and Eastern provinces  
21  
22  
23  
24  
25  
26  
27  
28  
29  
30  
31  
32  
33  
34  
35  
36

### 37 **Adjusted Population Attributable Risk Fractions**

38  
39 Using the final Bayesian hierarchical model, we estimated for two demographic groups (girls aged 14  
40 years, and boys aged 7 years) the PAF of anaemia due to *P. falciparum*, medium/high intensity hookworm  
41 infection, medium/high intensity *S. haematobium* infection, and acute malnutrition (prevalence of  
42 wasting in under 5s exceeding 15%) for each province in Kenya, adjusting for all other included predictors  
43 (Table 4). Our results suggest that the relative contribution of each risk factor varies considerably by  
44 province. For example, in Coast Province 13% (95% BCI: 4-23%) of anaemia in 14 year old girls attending  
45 school may be attributable to medium/high intensity hookworm, comparing with 6% (95% BCI: 2-10%) to  
46 *P. falciparum* infection and 3.1% (95% BCI: 0-8%) to schistosomiasis. Meanwhile, results suggest that  
47 reduction in acute malnutrition in Coast Province (to <5% wasting in ≤5s) would reduce anaemia  
48  
49  
50  
51  
52  
53  
54  
55  
56  
57  
58  
59  
60

1 prevalence by 19% (95% BCI: 0-38%). This contrasts with Western Province, where the estimated risk of  
2 anaemia attributable to medium and high intensity hookworm is 29% (95% BCI: 1-55%) and to *P.*  
3 *falciparum* 24% (95% BCI 0-41%); no school children in this district are exposed to *S. haematobium* and  
4 acute malnutrition in under 5s is predicted not to exceed 5%. The wide 95% BCIs observed reflect (i) the  
5 smaller sample sizes for provinces other than Coast (given that N = schools, not individuals), and (ii) the  
6 additional uncertainty surrounding proxies for malnutrition. Trends in PAFs observed for predictors in 7  
7 year old boys mirror those for older girls but are generally lower, a reflection of the lower baseline Hb  
8 levels in this group.  
9  
10  
11  
12  
13  
14  
15  
16  
17  
18  
19  
20  
21  
22  
23

## 24 Discussion

25  
26 As global commitment and resources for school health and nutrition initiatives grow,<sup>16</sup> there is an urgent  
27 need to strengthen our understanding of the likely impact of interventions aimed at tackling important  
28 health and development outcomes such as anaemia. This requires a detailed understanding of the relative  
29 contribution of aetiological factors at policy relevant scales. Here we present a uniquely detailed national  
30 analysis of risk factors for anaemia among schoolchildren in 167 schools across Kenya. We introduce a  
31 new approach using multilevel linear modelling to provide a detailed description the varying contribution  
32 of risk factors by administrative unit (province), whilst fully accounting for spatial variation in underlying  
33 mean Hb. Results provide a vital decision-making tool for cost-effective targeting the delivery of  
34 integrated, packages of interventions tailored to each province, with the aim of reducing anaemia in  
35 schoolchildren. For example, school-feeding programmes in Coast, Eastern and Rift Valley provinces may  
36 want to consider including iron-rich food stuffs, whilst programmes in Nyanza and Western provinces  
37 omitting malaria control initiatives may not see desired improvements in childhood anaemia.  
38  
39  
40  
41  
42  
43  
44  
45  
46  
47  
48  
49  
50

51  
52  
53  
54  
55 Our analysis found evidence that *P. falciparum*, hookworm and schistosomes were each significantly  
56 associated with lower mean Hb, observations consistent with current knowledge. Such findings  
57  
58  
59  
60

1 corroborate recent results from the Global Burden of Disease study, which suggests that globally for  
2 anaemia 10.2% of years lived with a disability (YLD) across all ages could be attributed to hookworm,  
3 17.9% to malaria and 3.4% to schistosomiasis.<sup>33</sup> Our analysis provides three additional insights into the  
4 epidemiology of anaemia. First, we confirm small-scale studies<sup>34-38</sup> that have suggested that coinfection  
5 with hookworm and *P. falciparum* may have a multiplicative effect on Hb level – effects which occur  
6 across Kenya. Second, we demonstrate pronounced geographical heterogeneity in the burden of anaemia  
7 attributable to identified risk factors. Associations for hookworm and *P. falciparum* were most  
8 pronounced in Western Province, where results suggest that together these two infections were  
9 attributable for close to 53% (95% BCI: 1.4-96.0%) of anaemia cases in girls aged 14 years. Together, these  
10 findings emphasise the importance of parasitic infections in the aetiology of anaemia in school-aged  
11 children and underscore current efforts to control helminths and malaria as part of integrated school  
12 health programmes.<sup>39,40</sup> The PAFs provided here are useful for translating our findings into numbers that  
13 can help policy decision makers appreciate the potential benefits of carefully targeted programmes  
14 tailored to each province that strike the best balance between dietary interventions, deworming and  
15 malaria control.<sup>17,41</sup>

16  
17  
18  
19  
20  
21  
22  
23  
24  
25  
26  
27  
28  
29  
30  
31  
32  
33  
34  
35  
36 Third, whilst acknowledging that we rely on proxy indicators, our results do suggest that poor food intake  
37 is an important contributor to anaemia in school children: the final model indicates that in communities  
38 where acute malnutrition is a severe public health problem (i.e. where wasting in under 5s exceeds 15%),  
39 mean Hb levels in school-aged children are on average 9.7 g/L lower than well nourished communities,  
40 and as such eliminating acute malnutrition as a public health problem could avert close to 20% of anaemia  
41 cases in 14 year old girls. This is consistent with limited evidence from smaller individual-level studies  
42 suggesting an association between under-nutrition and anaemia in school-aged populations.<sup>42,43</sup>

43  
44  
45  
46  
47  
48  
49  
50  
51  
52  
53  
54 Our spatially explicit hierarchical approach seeks to maximise the usefulness of this observational, cross-  
55 sectional data and results show that whilst much of the between school variation could be explained by  
56  
57  
58  
59  
60

1 included risk factors, a high degree of variation does still remain within schools. This suggests that there  
2 are individual-level factors beyond those measured that still need to be considered. In addition to  
3 individual iron status or food intake there are a number of candidates. HIV-infection is potential likely to  
4 be a contributor, as even in asymptomatic HIV infected individuals anaemia is a common manifestation.<sup>44</sup>  
5  
6  
7  
8  
9  
10  
11  
12  
13  
14  
15  
16  
17  
18  
19  
20  
21  
22  
23  
24  
25  
26  
27  
28  
29  
30  
31  
32  
33  
34  
35  
36  
37  
38  
39  
40  
41  
42  
43  
44  
45  
46  
47  
48  
49  
50  
51  
52  
53  
54  
55  
56  
57  
58  
59  
60

<sup>45</sup> We were also unable to account for genetic traits such as sickle-cell and other haemoglobinopathies,<sup>46</sup>  
or for the potential effect of menarche in adolescent girls.<sup>47</sup>

A number of additional study limitations should also be acknowledged. As we have previously  
acknowledged,<sup>20</sup> cross-sectional studies such as this are inevitably subject to a number of limitations  
including the potential of ecological fallacy, especially when incorporating population-level estimates. We  
acknowledge that our indicator of school-feeding (inclusion in the government school-feeding registers) is  
far from optimal, and the study would have benefitted from detailed individual-level data on iron status  
and food intake. In addition, modelled associations are likely to be lower than the true impact, due to  
non-systematic measurement error in our infection indicators, which rely on single samples using  
standard parasitological diagnosis with <100% sensitivity.<sup>48, 49</sup> Despite a robust stratified random sampling  
frame, our results may also be subject to some selection bias, as very ill children such as those with acute  
infections and severe chronic malnutrition may have been absent on the day of the school survey and  
thus not included in the study sample. Although contemporary regional or school-level attendance data is  
not available, overall school attendance rates are known to vary geographically across Kenya.<sup>50</sup> For  
example, in 2005 (the most recent year for which sub-national net primary school attendance figures are  
available) reported net attendance in Nyando District (Nyanza Province) was greater than 90% for both  
males and females, whilst in Turkana District (Rift Valley Province) levels were between 30-40%.<sup>50</sup> If Hb  
levels differ systematically between non-attending and attending school-aged children, this may act to  
either dilute or exaggerate geographical variation in Hb levels

1 An additional factor that would influence individual-level variation is the onset of menarche in girls: no  
2 specific data were collected to record this, and inclusion of a basic age-sex interaction term did not  
3 improve model fit suggesting that more detailed information is required. Finally, this analysis is unable to  
4 account for the impact of recently cleared infections on current Hb status. and the presented results  
5 represent a snapshot of the period 2008-2010 and it is conceivable that seasonality and intervention-  
6 related factors may have confounded results. However, the inclusion of mosquito net use, recent  
7 deworming or food security (a seasonal covariate) in multivariate models did not improve model fits,  
8 suggesting that temporal and control factors were relatively unimportant.  
9  
10  
11  
12  
13  
14  
15  
16  
17  
18  
19  
20

## 21 **Conclusions**

22 A recent focus on school-child and adolescent health has emphasised the need to develop a deeper  
23 understanding of factors impacting health and development of this population group.<sup>51-54</sup> Here we  
24 present a novel two-step process to model Hb levels and then predict associated anaemia prevalence in  
25 different areas of Kenya. Our approach adds considerable value over and above what could be achieved  
26 modelling anaemia directly, and the adopted geostatistical Bayesian framework allows for propagation of  
27 uncertainty associated at each step (including generation of predicted ecological covariates) into the final  
28 confidence limits. Future expansion of this model could look at interpolating existing results to make  
29 predictions in non-surveyed areas, although this would require generation of values for all included  
30 individual-level covariates for each prediction location, increasing prediction uncertainty. Our results  
31 highlight the marked geographical heterogeneity in the burden of anaemia attributable to identified risk  
32 factors in Kenya, which has major implications for effective targeting of packages of school-based  
33 interventions. We suggest that deworming can help tackle anaemia both in western and coastal Kenya,  
34 whereas malaria control is likely to have the greatest impact in western Kenya, whilst school-feeding  
35 programmes can help reduce anaemia in Coast, Eastern and Rift Valley provinces. The priority now should  
36 be to explore in detail the health and educational impact of carefully designed integrated infection and  
37 nutritional interventions in this age group.  
38  
39  
40  
41  
42  
43  
44  
45  
46  
47  
48  
49  
50  
51  
52  
53  
54  
55  
56  
57  
58  
59  
60



### Acknowledgements

We are very grateful to all the teachers, parents and especially children who participated in this survey and to the many facilitators and members of the survey teams who collected the data and to Don Bundy for comments. The survey work was supported by the Wellcome Trust UK as part of fellowship support to SJB (#81673) and by the Division of Malaria Control, Ministry of Public Health and Sanitation through a grant from the Department for International Development (DfID) through the WHO Kenya Country Office to Dr AM Noor and Dr E Juma.

### Footnotes

**Contributors** RLP was responsible for designing and conducting analysis, interpretation, drafting and production of the final manuscript. CG contributed to the survey design, data assembly and cleaning and contributed to final manuscript. CM and RWS contributed to survey design, interpretation of results and contributed to final manuscript. SJB designed the field surveys, provided scientific guidance and contributed to interpretation and preparation of the final manuscript. All authors read and approved the final manuscript.

**Funding** The fieldwork was supported by the Wellcome Trust UK and by the Division of Malaria Control, Ministry of Public Health and Sanitation. RLP acknowledges support of the Bill & Melinda Gates Foundation and CWG is supported by a Commonwealth Scholarship from the DfID. SJB is supported by a Wellcome Trust Senior Fellowship in Basic Biomedical Science (098045) and RWS is supported by a Wellcome Trust Principal Fellowship (079080).

**Competing interests** None.

**Data sharing statement:** The school survey dataset used for this analysis is available for download through the Global Atlas of Helminth Infection ([www.thiswormyworld.org](http://www.thiswormyworld.org)). The WinBUGs statistical code is available from the corresponding author at [rachel.pullan@lshtm.ac.uk](mailto:rachel.pullan@lshtm.ac.uk).

## References

1. United Nations Department of Economic and Social Affairs. World population prospects, 2010 revision; Available from: <http://esa.Un.Org/unpd/wpp/>.
2. Global Partnership for Education. All children learning: Report 2011. Global Partnership for Education; Available from: <http://allchildrenlearningreport.globalpartnership.org>
3. World Bank. Fresh: Focusing resources on education and school health. A fresh start to improving the quality and equity of education. UNESCO, UNICEF, WHO & World Bank; 2000
4. McLean E, Cogswell M, Egli I, et al. Worldwide prevalence of anaemia, WHO vitamin and mineral nutritional information system, 1993-2005. *Public Health Nutrition*. 2008;12(4):444-454.
5. Best C, Neufingerl N, van Geel L, et al. The nutritional status of school-aged children: Why should we care? *Food and Nutrition Bulletin*. 2010;31(3):400-417.
6. Grantham-McGregor S, Ani C. A review of studies on the effect of iron deficiency on cognitive development in children. *Journal of Nutrition*. 2001 Feb;131(2S-2):649S-666S.
7. Fretham SJ, Carlson ES, Georgieff MK. The role of iron in learning and memory. *Advances in Nutrition*. 2011;2(2):112-121.
8. Scholl TO. Iron status during pregnancy: Setting the stage for mother and infant. *American Journal of Clinical Nutrition*. 2005;81(5):1218S-1222S.
9. Dharmalingam A, Navaneetham K, Krishnakumar CS. Nutritional status of mothers and low birth weight in india. *Maternal and Child Health Journal*. 2010;14(2):290-298.
10. Clarke SE, Jukes M, Njagi JK, et al. Effect of intermittent preventive treatment of malaria on health and education in schoolchildren: A cluster-randomised, double-blind, placebo-controlled trial. *Lancet*. 2008;372(9633):127-138.
11. Leenstra T, Phillips-Howard PA, Kariuki SK, et al. Permethrin-treated bed nets in the prevention of malaria and anemia in adolescent schoolgirls in western kenya. *American Journal of Tropical Medicine and Hygiene*. 2003;68(S86-S93).
12. Smith JL, Brooker S. The impact of hookworm infection and deworming on anaemia in non-pregnant populations: A quantitative update. *Tropical Medicine and International Health*. 2010;15(7):776-795.
13. Leenstra T, Kariuki SK, Kurtis JD, et al. The effect of weekly iron and vitamin a supplementation on hemoglobin levels and iron status in adolescent schoolgirls in western kenya. *European Journal of Clinical Nutrition*. 2009;63(2):173-182.
14. Gera T, Sachdev HP, Nestel P. Effects of iron supplementation on physical performance in children and adolescents: Systematic review of randomized controlled trials. *Indian Pediatrics*. 2007;44:15-24.
15. Bundy DAP, Burbano C, Grosh M, et al. *Rethinking school feeding: Social safety nets, child development and the education sector*. The World Bank: New York; 2009.
16. Bundy DAP. *Rethinking school health: A key component of education for all*. Washington: The World Bank; 2012.
17. Soares Magalhães RJ, Clements ACA. Mapping the risk of anaemia in preschool-age children: The contribution of malnutrition, malaria, and helminth infections in West Africa. *PLoS Medicine*. 2011;8(6):e1000438.
18. Gitonga C, Karanja P, Kihara J, et al. Implementing school malaria surveys in kenya: Towards a national surveillance system. *Malaria Journal*. 2010;9(1):306.
19. Gitonga CW, Edwards T, Karanja PN, et al. *Plasmodium* infection, anaemia and mosquito net use among school children across different settings in Kenya. *Tropical Medicine and International Health*. 2012;17(7):858-870.
20. Brooker S, Pullan RL, Gitonga CW, et al. *Plasmodium*-helminth coinfection and its sources of heterogeneity across east africa. *Journal of Infectious Diseases* 2012;205(5):841-852.
21. Balk DL, Deichmann U, Yetman G, et al. Determining global population distribution: Methods, applications and data. *Advances in Parasitology*. 2006;62:119-156.

22. Balk D, Pozzi F, Yetman G, et al. The distribution of people and the dimension of place: Methodologies to improve the global estimation of urban extents. Urban Remote Sensing Conference; 2004; Available at: <http://www.iussp.org/Activities/wgc-urb/balk.pdf>
23. Kenya National Bureau of Statistics, Measure DHS. Kenya: Dsh, 2008-09 - final report. Calverton, Maryland, USA: Measure DHS, ICF Macro; 2010
24. Measure DHS. Kenya 2008-09 DHS data. Available from: <http://www.measuredhs.com>
25. Diggle P, Moyeed R, Tawn J. Model-based geostatistics (with discussion). *Applied Statistics*. 1998;47:299-350.
26. FEWSNET. Famine early warning system network (FEWSNET) livelihood zone map for Kenya. FEWSNET and USAID; 2011
27. Grillo J, Holt J. Application of the livelihood zone maps and profiles for food security analysis and early warning: USAID FEWSNET; 2009
28. FEWSNET. Famine early warning system network (FEWSNET) Kenya archive: Food security update. FEWSNET and USAID; 2011
29. WHO. Iron deficiency anaemia: Assessment, prevention and control. A guide for programme managers. Geneva: World Health Organisation; 2001
30. Filmer D, Pritchett LH. Estimating wealth effects without expenditure data--or tears: An application to educational enrollments in states of india. *Demography*. 2001;38(1):115-32.
31. Williams RL. A Note on Robust Variance Estimation for Cluster-Correlated Data. *Biometrics*. 2000; 56: 645-6.
32. Rockhill B, Newman B, Weinberg C. Use and misuse of population attributable fractions. *American Journal of Public Health*. 1998;88(1):15-19.
33. Jasrasaria J, Murray CJL, Naghavi M. Global Burden of Disease 2010 Estimate: Strategy Report for Anaemia Envelope. [Unpublished report]. *Personal Communication* 2012.
34. Brooker S, Akhwale WS, Pullan R, et al. Epidemiology of *Plasmodium*-helminth coinfection in Africa: Potential impact on anaemia and prospects for combining control. *American Journal of Tropical Medicine & Hygiene*. 2007;77:88-98.
35. Pullan R, Brooker S. The health impact of polyparasitism in humans: Are we under-estimating the burden of parasitic diseases? *Parasitology*. 2008:1-12.
36. Nkuo-Akenji TK, Chi PC, Cho JF, et al. Malaria and helminth co-infection in children living in a malaria endemic setting of Mount Cameroon and predictors of anaemia. *Journal of Parasitology*. 2006;92(6):1191-1195.
37. Midzi N, Mtapuri-Zinyowera S, Mapingure MP, et al. Consequences of polyparasitism on anaemia among primary school children in Zimbabwe. *Acta Trop*. 2010;115:103-111.
38. Ezeamama EE, McGarvey ST, Acosta LP, et al. The synergistic effect of concomitant schistosomiasis, hookworm, and trichuris infections on children's anemia burden. *PLoS Negl Trop Dis*. 2008;2(6):e245.
39. Bundy DAP, Shaeffer S, Jukes M, et al. School based health and nutrition programs. *Chapter 58 in "Disease Control Priorities for Developing Countries"*. 2006.
40. Brooker S, Clarke S, Snow RW, et al. Malaria in african schoolchildren: Options for control. *Transactions of the Royal Society of Tropical Medicine and Hygiene*. 2008;102(4):304-305.
41. Rowe AK, Powell KE, Flanders WD. Why population attributable fractions can sum to more than one. *American Journal of Preventative Medicine*. 2004;26:243-249.
42. Anumudu C, Adolami M, Igwe C, et al. Nutritional anaemia and malaria in pre-school and school-aged children. 2008;1(11-17).
43. Daboné C, Delise HF, Receveur O. Poor nutritional status of schoolchildren in urban and peri-urban areas of Ouagadougou (Burkina Faso). *Nutrition Journal*. 2011;10:34.
44. Calis JC, van Hensbroek MB, de Haan RJ, et al. HIV-associated anemia in children: A systematic review from a global perspective. *AIDS*. 2008;22(10):1099-1112.
45. Levine AM, Berhane K, Masri-Lavine L, et al. Prevalence and correlates of anemia in a large cohort of HIV-infected women: Women's interagency HIV study. *Journal of Acquired Immune Deficiency Syndrome*. 2001;26:28-35.
46. Tolentino K, Friedman JF. An update on anaemia in less developed countries. *American Journal of Tropical Medicine and Hygiene*. 2007;77:44-51.

- 1  
2  
3  
4  
5  
6  
7  
8  
9  
10  
11  
12  
13  
14  
15  
16  
17  
18  
19  
20  
21  
22  
23  
24  
25  
26  
27  
28  
29  
30  
31  
32  
33  
34  
35  
36  
37  
38  
39  
40  
41  
42  
43  
44  
45  
46  
47  
48  
49  
50  
51  
52  
53  
54  
55  
56  
57  
58  
59  
60
47. Leenstra T, Kakiuki SK, Kurtis JD, et al. Prevalence and severity of anaemia and iron deficiency: Cross-sectional studies in adolescent schoolgirls in western Kenya. *European Journal of Clinical Nutrition*. 2004;58(4):681-691.
48. Booth M, Vounatsou P, N'Goran E K, et al. The influence of sampling effort and the performance of the kato-katz technique in diagnosing *Schistosoma mansoni* and hookworm co-infections in rural Cote d'Ivoire. *Parasitology*. 2003;127(Pt 6):525-31.
49. Okell LC, Ghani AC, Lyons E, et al. Submicroscopic infection in *Plasmodium falciparum* endemic populations: A systematic review and meta-analysis. *Journal of Infectious Disease*. 2009;15(10):1509-1517.
50. World Bank. World development report 2007: Development and the next generation. Washington: The World Bank
51. Education and Policy Data Center. Kenya 2005 District Primary Education Profiles. Available From: [www.epdc.org/country/kenya](http://www.epdc.org/country/kenya)
52. Little AW, Green A. Successful globalisation, education and sustainable development. *International Journal of Education and Development*. 2009;29:166-174.
53. Sawyer SM, Afifi RA, Bearinger LH, et al. Adolescence: A foundation for future health. *The Lancet*. 2012;379(9826):1630-1640.
54. Kleinbaum DG, Kupper LL, Morgenstern H. Epidemiological research. Belmont, CA: Lifetime Learning Publications; 1982. p. 163.

**Figure legends:**

**Figure 1 Schematic of adopted analysis strategy.** The dual aim of this analysis strategy was to (i) model the impact of risk factors on children's haemoglobin (Hb) levels, and (ii) estimate the adjusted Population Attributable Risk Fraction (PAF) associated with important, modifiable risk factors. This process was repeated at each realisation of the Bayesian hierarchical model to provide posterior mean estimates and credible intervals for all parameters of relevance.

**Figure 2 Spatial distribution of mean haemoglobin distribution across Kenya, by school.** HB is adjusted for altitude, population density (persons / km<sup>2</sup>) is shown for reference.

**Figure 3 Graph of spatial random-effect (school-level residual) from the multivariate, Bayesian hierarchical model for Hb.** Each point represents one school; the posterior mean is shown by the dot and the 95% BCI are represented by the error bars. The horizontal straight line in the middle of the graph represents the overall mean of the residuals, which are zero centred. Inset shows the school locations, shaded by the value of the school-level residual.

For peer review only

1  
2  
3  
4  
5  
6  
7  
8  
9  
10  
11  
12  
13  
14  
15  
16  
17  
18  
19  
20  
21  
22  
23  
24  
25  
26  
27  
28  
29  
30  
31  
32  
33  
34  
35  
36  
37  
38  
39  
40  
41  
42  
43  
44  
45  
46  
47  
48  
49  
50  
51  
52  
53  
54  
55  
56  
57  
58  
59  
60

**Tables:**

**Table 1** Definition of included anthropometric indicators, and population-based cut-off values for severity of malnutrition, as defined by the World Health Organization.

| Anthropometric Measurement |                                                      | Severity of malnutrition (prevalence range for < 6 years) |                      |                    |
|----------------------------|------------------------------------------------------|-----------------------------------------------------------|----------------------|--------------------|
|                            |                                                      | Low severity                                              | Medium/high severity | Very high severity |
| Stunting                   | Height-for-age Z-score > -2 SD                       | <20%                                                      | 20-40%               | >40%               |
| Wasting                    | weight-for-height Z-score > -2 SD                    | <5%                                                       | 5-15%                | >15%               |
| Underweight                | weight-for-age <i>or</i> BMI-for-age Z-score > -2 SD | <10%                                                      | 10-30%               | >30%               |

**Table 2** Mean Hb concentration according to infection status, nutritional proxies and other characteristics in 16,941 children aged 5-16 years (univariate analysis).

| Variable                                                        | Data type and source                    | Children No (%) | Mean Hb shift, g/L (SE) | p      |
|-----------------------------------------------------------------|-----------------------------------------|-----------------|-------------------------|--------|
| <b>Sex</b>                                                      |                                         |                 |                         |        |
| Female                                                          | Individual – KHS                        | 8,314 (49.1)    | (vs. female)            |        |
| Male                                                            | Individual – KHS                        | 8,627 (50.9)    | - 1.36 (0.28)           | <0.001 |
| Age (in years)                                                  | Individual – KHS                        | -               | + 0.89 (0.11)           | <0.001 |
| <b>Socio-economic indicators</b>                                |                                         |                 |                         |        |
| Educated household head <sup>1</sup>                            | Individual – KHS                        | 8,333 (49.2)    | + 0.82 (0.41)           | 0.05   |
| Household owns a mobile phone                                   | Individual – KHS                        | 10,065 (59.4)   | + 1.42 (0.40)           | <0.001 |
| <b>SES quintile</b>                                             |                                         |                 |                         |        |
| Lowest                                                          | Individual – KHS                        | 3,272 (20.4)    | (vs. lowest)            |        |
| Mid (quintiles 2-4)                                             |                                         | 9,926 (61.8)    | + 2.35 (0.50)           | <0.001 |
| Highest                                                         |                                         | 2,854 (17.8)    | + 3.07 (0.82)           | <0.001 |
| Urban location                                                  | School-level – digital UE map           | 1,237 (7.3)     | 1.56 (1.52)             | 0.3    |
| <b>Current infections</b>                                       |                                         |                 |                         |        |
| <i>P. falciparum</i> parasitaemic                               | Individual – KHS                        | 607 (3.6)       | -3.36 (0.77)            | <0.001 |
| Med/high intensity hookworm (>100 epg)                          | Individual – KHS                        | 931 (5.5)       | -2.81 (0.69)            | <0.001 |
| Med/high intensity <i>S. haematobium</i> (>500 epg)             | Individual – KHS                        | 799 (4.7)       | -3.81 (1.02)            | <0.001 |
| Usually sleeps under a net                                      | Individual – KHS                        | 9,763 (57.6)    | - 1.78 (0.52)           | 0.001  |
| Taken anthelmintic in previous 6 months                         | Individual – KHS                        | 7,494 (44.2)    | + 1.24 (0.48)           | 0.01   |
| <b>Nutritional proxies</b>                                      |                                         |                 |                         |        |
| <b>Wasting in under 5s (%) <sup>2</sup></b>                     |                                         |                 |                         |        |
| Under 5%                                                        | Ecological – interpolated from 2008 DHS | 4,027 (23.8)    | (vs <5%)                |        |
| 5-15%                                                           |                                         | 10,257 (60.6)   | -5.58 (1.04)            | <0.001 |
| Over 15%                                                        |                                         | 2,657 (15.7)    | -8.14 (1.21)            | <0.001 |
| <b>Low BMI in adult women (%) <sup>3</sup></b>                  |                                         |                 |                         |        |
| Under 20%                                                       | Ecological – interpolated from 2008 DHS | 12,867 (76.0)   | (vs. <20%)              |        |
| Over 20%                                                        |                                         | 4,072 (24.0)    | -1.98 (0.80)            | 0.01   |
| <b>Consumption iron rich foods in under 5s (%) <sup>4</sup></b> |                                         |                 |                         |        |
| Under 25%                                                       | Ecological – interpolated from 2008 DHS | 14,572 (86.0)   | (vs. <25%)              |        |
| Over 25%                                                        |                                         | 2,369 (14.0)    | + 1.07 (1.24)           | 0.4    |
| <b>School-feeding (SF) status: <sup>5</sup></b>                 |                                         |                 |                         |        |
| Not a SF district                                               | School-level – MoE registers            | 3,690 (21.8)    | (vs. not SF dist)       |        |
| SF district – no programme in school                            |                                         | 8,417 (49.7)    | -7.34 (1.08)            | <0.001 |
| SF district – programme in school                               |                                         | 4,834 (28.5)    | -4.80 (1.19)            | <0.001 |
| <b>Generalised livelihood zone <sup>6</sup></b>                 |                                         |                 |                         |        |
| Mixed farming                                                   |                                         | 3,295 (19.5)    | (vs. mixed)             |        |
| Pastoral and agro-pastoral                                      | Ecological – FEWSNET                    | 4,991 (29.5)    | + 1.11 (1.45)           | 0.4    |
| Riverine and fishing                                            |                                         | 641 (3.8)       | + 2.08 (2.42)           | 0.4    |
| Medium potential farming                                        |                                         | 4,073 (24.0)    | - 2.93 (1.13)           | 0.02   |
| High potential farming                                          |                                         | 3,941 (23.3)    | + 1.37 (2.14)           | 0.2    |
| <b>Food security status <sup>7</sup></b>                        |                                         |                 |                         |        |
| Generally food secure                                           | Ecological – FEWSNET                    | 2,756 (16.3)    | (vs. secure)            |        |
| Moderately food insecure                                        |                                         | 7,755 (45.8)    | -3.20 (1.27)            | 0.01   |
| Highly food insecure                                            |                                         | 6,048 (35.7)    | - 6.17 (1.25)           | <0.001 |
| Extremely food insecure                                         |                                         | 382 (2.3)       | - 5.12 (1.52)           | 0.001  |

KSH; Kenya School Health survey (conducted 2008-2010). DHS; Kenya Demographic Health Survey conducted 2008/2009. MoE; Kenya Ministry of Education. FEWSNET; Famine early warning system network. SE; standard error.

<sup>1</sup> household head educated to primary complete or above (reported).

<sup>2,3,4</sup> Interpolated from Kenya 2008/2009 DHS survey

<sup>2</sup> school included in either the Homegrown School Meals Programme (HGSM) or Emergency HGSM 2010 registers

<sup>6</sup> based on the USAID/FEWSNET Generalised Livelihood Zone 2010 Classification for Kenya

<sup>7</sup> based on the USAID/FEWSNET Food Insecurity Severity Scale for the quarter corresponding to the KSH survey date.

**Table 3** Bayesian hierarchical multivariate regression model for haemoglobin levels.

| Variable                                              | Mean Hb shift (g/L) | 95% BCI / SD    |
|-------------------------------------------------------|---------------------|-----------------|
| Baseline haemoglobin                                  | 117.3               | (113.9, 120.5)  |
| Sex (male)                                            | -1.53               | (-1.94, -1.13)  |
| Age (in years)                                        | +1.08               | (+0.99, +1.17)  |
| SES quintile (vs. quintiles 2-4)                      |                     |                 |
| lowest                                                | -0.56               | (-1.14, +0.02)  |
| highest                                               | 0.25                | (-0.31, +0.86)  |
| Med/high intensity <i>S. haematobium</i> (>500 epg)   | -1.75               | (-2.92, -0.60)  |
| Med/high intensity hookworm (>100 epg)                | -1.03               | (-2.00, -0.02)  |
| <i>P. falciparum</i> parasitaemic                     | -3.00               | (-4.29, -1.68)  |
| Med/high hookworm – <i>P. falciparum</i> co-infection | -5.56               | (-8.64, -2.67)  |
| Wasting in under 5s (vs <5% prevalence)               |                     |                 |
| 5-15%                                                 | -4.39               | (-6.56, -2.09)  |
| >15%                                                  | -9.74               | (-12.16, -7.45) |
| School-feeding (SF) status:                           |                     |                 |
| SF district – no programme in school                  | -2.14               | (-4.76, +0.46)  |
| SF district – programme in school                     | -2.78               | (-5.43, -0.21)  |
| <b>Random effect terms</b>                            |                     |                 |
| Individual $\sigma^2$                                 | 183.6               | (2.02)          |
| Spatial $\sigma^2$ (school-level)                     | 29.5                | (7.93)          |
| Range of spatial correlation (km)                     | 194                 | (99,318)        |



**Table 4: Predicted adjusted population attributable risk fractions for key predictors across Kenya.** Estimates are based on the predicted numbers anaemic in each risk group given by the mean and individual-level standard deviations at each realisation of the Bayesian multivariate model for Hb, and are shown for two demographic groups by Province.

| Population Attributable Risk fractions by Province, % (95% BCI) |            |                     |                   |                   |                   |                     |
|-----------------------------------------------------------------|------------|---------------------|-------------------|-------------------|-------------------|---------------------|
|                                                                 | Central    | Coast               | Eastern           | Nyanza            | Rift Valley       | Western             |
| <b>14 year old girls:</b>                                       |            |                     |                   |                   |                   |                     |
| Observed prevalence of anaemia                                  | 3.3        | 37.3                | 34.7              | 30.8              | 19.4              | 25.0                |
| <b>PAF for:</b>                                                 |            |                     |                   |                   |                   |                     |
| Med/high intensity hookworm                                     | <i>n/a</i> | 13.0<br>(3.7, 23.1) | 5.9<br>(0, 12.5)  | 8.2<br>(0, 30.0)  | 5.0<br>(0, 12.5)  | 29.0<br>(1.4, 55.1) |
| Malaria                                                         | <i>n/a</i> | 5.8<br>(2.0, 10.4)  | <i>n/a</i>        | 27.6<br>(0, 49.1) | <i>n/a</i>        | 23.6<br>(0, 40.9)   |
| Schistosomiasis                                                 | <i>n/a</i> | 3.1<br>(0, 0.08)    | <i>n/a</i>        | <i>n/a</i>        | <i>n/a</i>        | <i>n/a</i>          |
| Acute malnutrition <sup>a</sup>                                 | <i>n/a</i> | 18.5<br>(0, 37.9)   | 18.4<br>(0, 73.0) | <i>n/a</i>        | 16.0<br>(0, 52.5) | <i>n/a</i>          |
| <b>7 year old boys:</b>                                         |            |                     |                   |                   |                   |                     |
| Observed prevalence of anaemia                                  | 5.0        | 43.3                | 23.2              | 43.2              | 22.4              | 19.2                |
| <b>PAF for:</b>                                                 |            |                     |                   |                   |                   |                     |
| Med/high intensity hookworm                                     | <i>n/a</i> | 5.6<br>(1.0, 10.3)  | <i>n/a</i>        | 11.0<br>(0, 21.6) | 3.4<br>(0, 6.6)   | 13.5<br>(0, 27.5)   |
| Malaria                                                         | <i>n/a</i> | 1.5<br>(0.3, 6.1)   | <i>n/a</i>        | 14.3<br>(0, 32.0) | <i>n/a</i>        | 15.8<br>(0, 28.1)   |
| Schistosomiasis                                                 | <i>n/a</i> | 0<br>(0, 5.5)       | <i>n/a</i>        | <i>n/a</i>        | <i>n/a</i>        | <i>n/a</i>          |
| Acute malnutrition <sup>a</sup>                                 | <i>n/a</i> | 16.4<br>(0, 33.5)   | 16.4<br>(0, 67.1) | <i>n/a</i>        | 14.1<br>(0, 45.9) | <i>n/a</i>          |

<sup>a</sup> Exposure to “acute malnutrition”, prevalence of wasting in under 5s exceeds 5%  
*n/a* – no children are exposed (i.e. prevalence of predictor is zero in this demographic group)

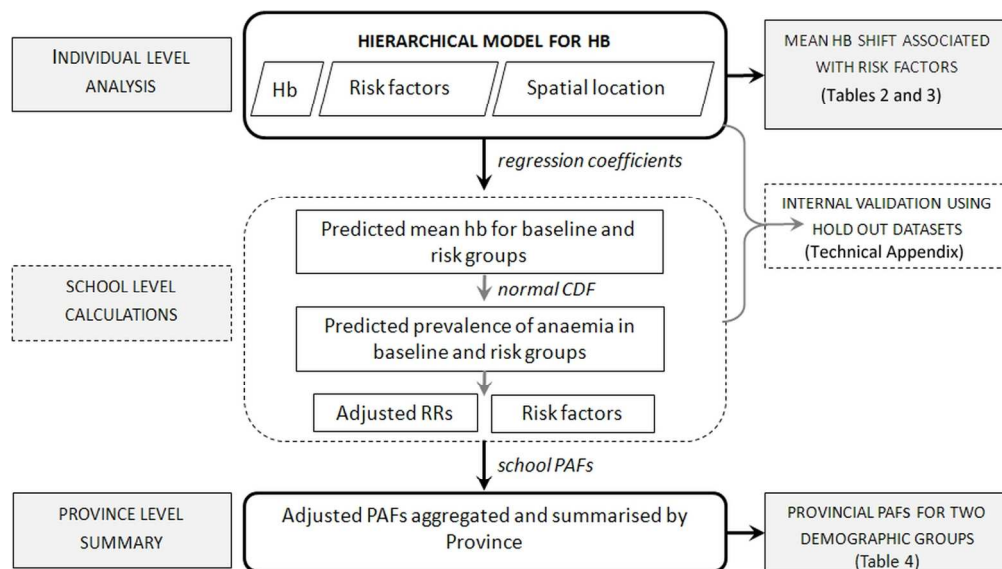

Figure 1. Schematic of adopted analysis strategy. The dual aim of this analysis strategy was to (i) model the impact of risk factors on children’s haemoglobin (Hb) levels, and (ii) estimate the adjusted Population Attributable Risk Fraction (PAF) associated with important, modifiable risk factors. This process was repeated at each realisation of the Bayesian hierarchical model to provide posterior mean estimates and credible intervals for all parameters of relevance.

160x90mm (300 x 300 DPI)

1  
2  
3  
4  
5  
6  
7  
8  
9  
10  
11  
12  
13  
14  
15  
16  
17  
18  
19  
20  
21  
22  
23  
24  
25  
26  
27  
28  
29  
30  
31  
32  
33  
34  
35  
36  
37  
38  
39  
40  
41  
42  
43  
44  
45  
46  
47  
48  
49  
50  
51  
52  
53  
54  
55  
56  
57  
58  
59  
60

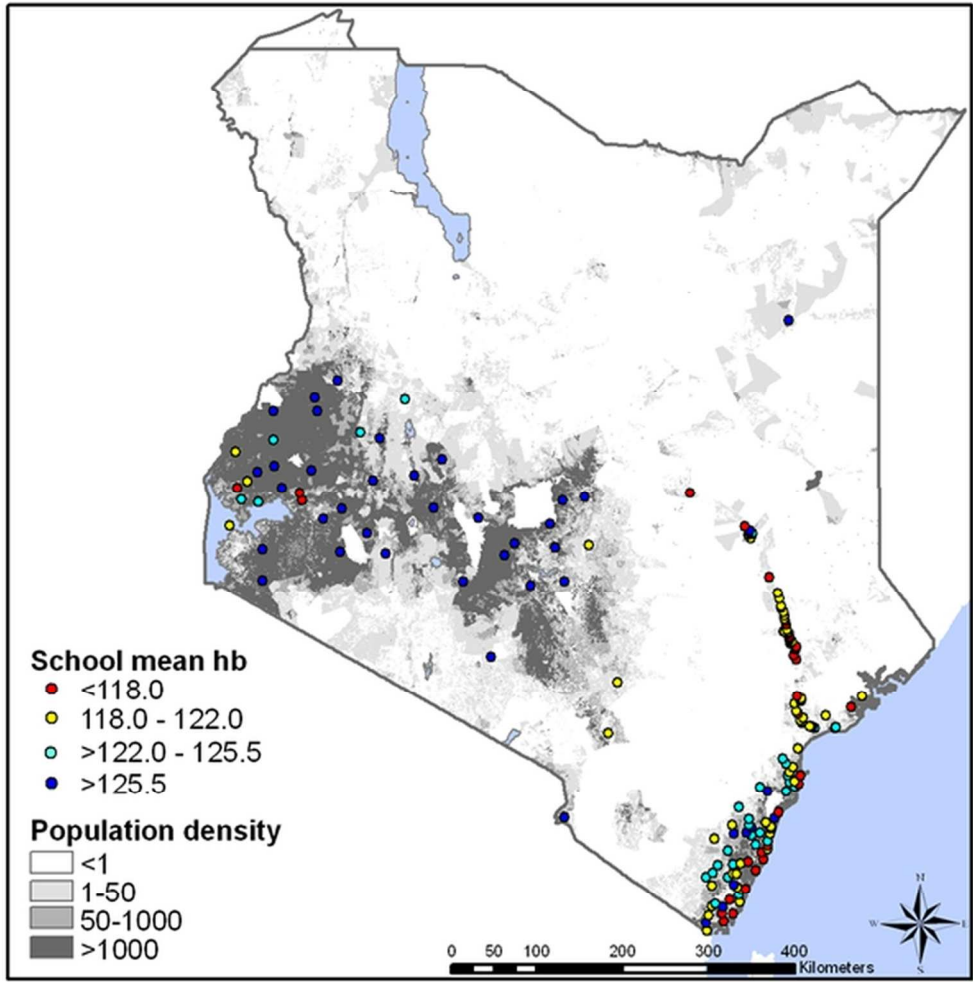

Figure 2 Spatial distribution of mean haemoglobin distribution across Kenya, by school. HB is adjusted for altitude, population density (persons / km<sup>2</sup>) is shown for reference.  
90x90mm (300 x 300 DPI)

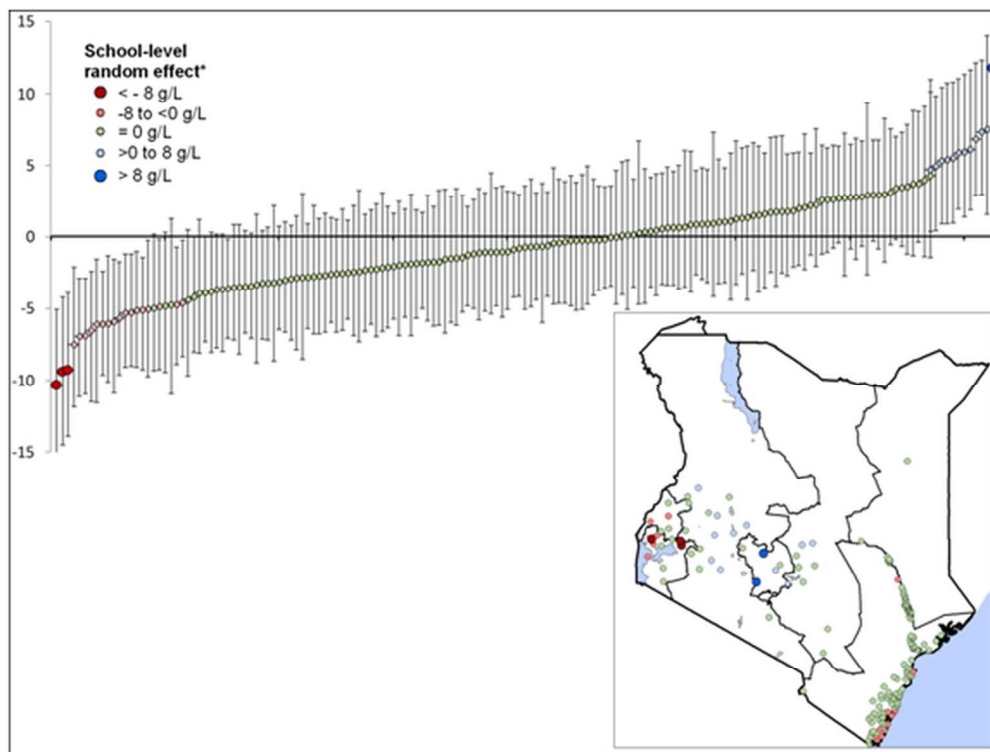

Figure 3. Graph of spatial random-effect (school-level residual) from the multivariate, Bayesian hierarchical model for Hb. Each point represents one school; the posterior mean is shown by the dot and the 95% BCI are represented by the error bars. The horizontal straight line in the middle of the graph represents the overall mean of the residuals, which are zero centred. Inset shows the school locations, shaded by the value of the school-level residual.  
119x90mm (300 x 300 DPI)

**SUPPLEMENTARY TECHNICAL APPENDIX****Estimating the relative contribution of parasitic infections and nutrition for anaemia among school-aged children in Kenya: a subnational geostatistical analysis**

Model fit for all Bayesian estimation was carried out in WinBUGs 1.4.1 (Imperial College London, and MRC, London, UK). Semi-variogram analysis was conducted in R, and all other descriptive statistical analysis and data management were carried out in Stata 11.0 software (StataCorp)

**Bayesian Kriging of Nutritional Proxy Data**

Proxy data for macro-nutritional status in school-aged children were derived from the Kenya 2008-09 Demographic and Health Survey (DHS). This dataset includes anthropometric measurements for 5,470 children aged under 6 years and 7,548 women of child-bearing age (ages 15 to 49). These were chosen to provide a general indication of the degree of malnutrition prevalent in the communities where school-children were surveyed. As DHS clusters rarely coincide with the location of surveyed schools (see Figure S1), it was first necessary to interpolate cluster-level prevalence to school locations using a weighted moving average approach (kriging). In order to provide a realistic account of uncertainty in both the predicted prevalence and the covariance functions used to define weighting, thus providing a range of potential prevalence values, this was embedded in a Bayesian framework using a simple binomial model structure.

The numbers of examined ( $n_i$ ) and positive ( $Y_i$ ) individuals for each anthropometric indicator in cluster  $i$  ( $i=1, \dots, N$ ) were modelled as binomial variates in the form:

$$Y_i \sim \text{Binomial}(n_i, p_i)$$

$$\text{logit}(p_i) = \alpha + u_i$$

1 where  $\alpha$  is the global mean prevalence and  $u_i$  a geostatistical random effect modelled using an isotropic,  
 2 stationary exponential decay function:  $f(d_{ab}; \phi) = \exp[-(\phi d_{ab})]$  where  $d_{ab}$  is the straight-line  
 3 distance between cluster locations a and b, and  $\phi$  is the rate of decline of spatial correlation. A non-  
 4 distance between cluster locations a and b, and  $\phi$  is the rate of decline of spatial correlation. A non-  
 5 informative normal prior was used for  $\alpha$ , the prior distribution of  $\phi$  was uniform with upper and lower  
 6 bounds set at 0.05 and 50 and the precision of  $u_i$  was given non-informative gamma distribution.  
 7  
 8 Following a burn-in of 10,000 iterations, the model was run for a further 10,000 iterations with thinning  
 9 every ten iterations, during which predictions were stored.  
 10  
 11  
 12  
 13  
 14  
 15  
 16  
 17  
 18  
 19  
 20  
 21  
 22  
 23  
 24  
 25  
 26  
 27  
 28  
 29  
 30  
 31  
 32  
 33  
 34  
 35  
 36  
 37  
 38  
 39  
 40  
 41  
 42  
 43  
 44  
 45  
 46  
 47  
 48  
 49  
 50  
 51  
 52  
 53  
 54  
 55  
 56  
 57  
 58  
 59  
 60

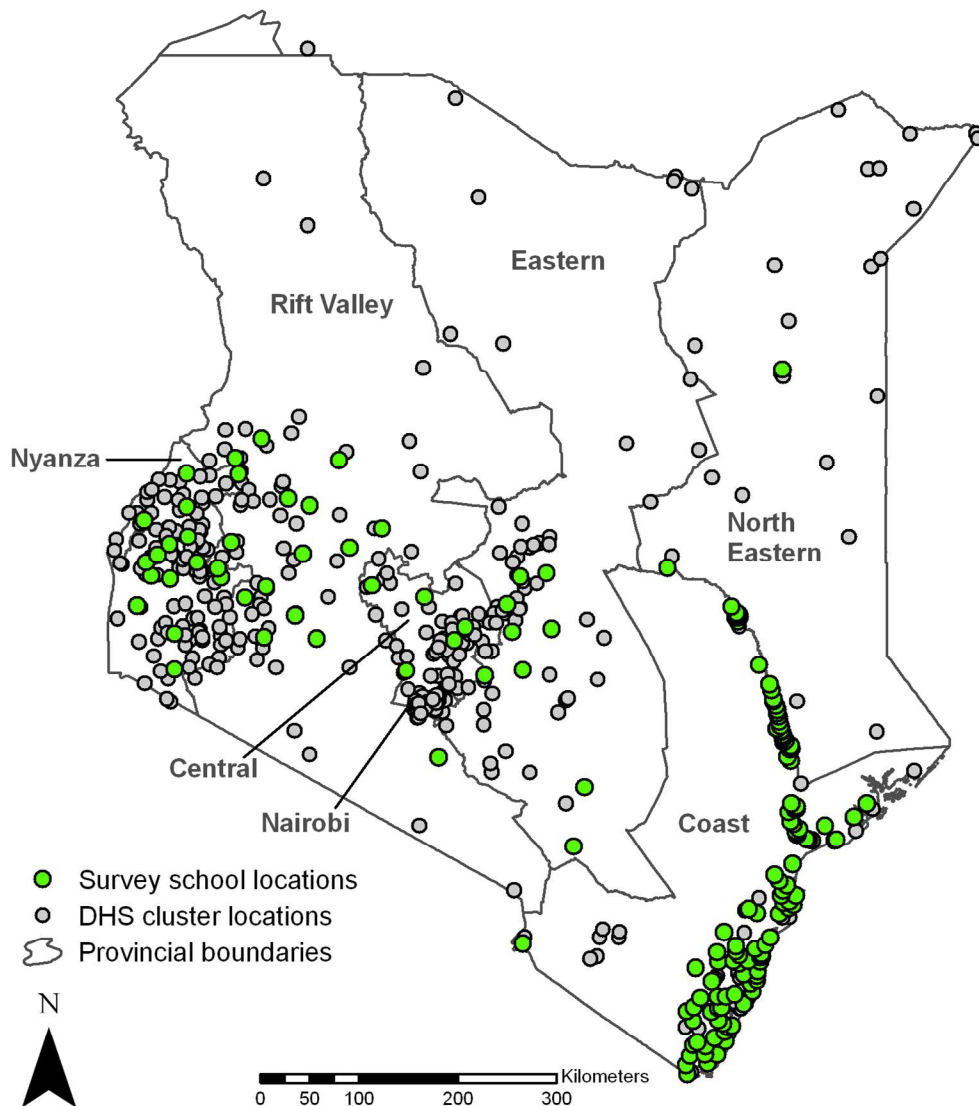

1 **Figure S1: Location of 167 school surveys and 400 DHS cluster sites across Kenya.** School survey data was  
 2  
 3 collected between 2008-2010, and DHS data between 2008-2009. Provincial boundaries are shown for  
 4  
 5 reference.  
 6  
 7  
 8  
 9  
 10

11 **Table S1:** Summary of results from Bayesian kriging of anthropometric indicator data collected during 2008-  
 12 2009 Kenya DHS survey.  
 13

| Anthropometric Indicator                                     | Province      | Mean observed prevalence at DHS clusters, % (range) | Mean predicted prevalence at school survey sites, % (range) |
|--------------------------------------------------------------|---------------|-----------------------------------------------------|-------------------------------------------------------------|
| Wasting (in children < 5 yrs)                                | Central       | 3.3 (0, 25.0)                                       | 4.1 (3.9, 4.7)                                              |
|                                                              | Coast         | 8.5 (0, 35.3)                                       | 10.5 (4.8, 22.8)                                            |
|                                                              | Eastern       | 7.2 (0, 35.3)                                       | 5.1 (4.1, 6.4)                                              |
|                                                              | North Eastern | 12.6 (0, 33.3)                                      | 19.0 (12.7, 22.1)                                           |
|                                                              | Nyanza        | 2.1 (0, 11.8)                                       | 2.5 (2.0, 3.7)                                              |
|                                                              | Rift Valley   | 4.9 (0, 21.1)                                       | 4.1 (2.5, 9.1)                                              |
|                                                              | Western       | 2.0 (0, 23.1)                                       | 2.3 (1.9, 3.6)                                              |
| Low BMI (in women 15-49 yrs)                                 | Central       | 8.5 (0, 4.0)                                        | 9.8 (5.6, 19.0)                                             |
|                                                              | Coast         | 11.7 (0, 44.4)                                      | 16.8 (7.2, 28.5)                                            |
|                                                              | Eastern       | 16.8 (0, 47.6)                                      | 13.6 (5.5, 23.9)                                            |
|                                                              | North Eastern | 27.6 (6.2, 52.9)                                    | 21.0 (16.3, 31.4)                                           |
|                                                              | Nyanza        | 7.4 (0, 31.3)                                       | 7.2 (4.6, 9.7)                                              |
|                                                              | Rift Valley   | 14.8 (0, 55.0)                                      | 11.8 (5.6, 22.3)                                            |
|                                                              | Western       | 7.4 (0, 21.7)                                       | 8.2 (7.1, 9.3)                                              |
| Consumed iron rich foods in past 24 hours (children < 5 yrs) | Central       | 14.8 (0, 45.5)                                      | 17.7 (9.1, 25.0)                                            |
|                                                              | Coast         | 16.2 (0, 55.0)                                      | 17.5 (6.8, 31.4)                                            |
|                                                              | Eastern       | 16.3 (0, 50.0)                                      | 18.1 (16.0, 20.7)                                           |
|                                                              | North Eastern | 15.3 (0, 60.7)                                      | 9.3 (5.9, 15.6)                                             |
|                                                              | Nyanza        | 19.2 (0, 55.6)                                      | 21.4 (13.9, 27.7)                                           |
|                                                              | Rift Valley   | 17.3 (0, 55.6)                                      | 17.2 (7.5, 23.8)                                            |
|                                                              | Western       | 31.7 (0, 69.2)                                      | 28.3 (24.2, 35.3)                                           |

14  
 15  
 16  
 17  
 18  
 19  
 20  
 21  
 22  
 23  
 24  
 25  
 26  
 27  
 28  
 29  
 30  
 31  
 32  
 33  
 34  
 35  
 36  
 37  
 38  
 39  
 40  
 41  
 42  
 43  
 44  
 45  
 46  
 47  
 48  
 49  
 50  
 51  
 52  
 53  
 54  
 55  
 56  
 57  
 58  
 59  
 60

As can be seen from Table S1, observed prevalence of each indicator in the DHS dataset varied considerably within each Province. This is reflected in part by the range of predicted values shown for the school survey sites, although as geostatistical models tend to regress towards the mean the range in predicted values is considerably less. As under- and over-prediction are unlikely to be biased, this suggests that true association between proxies of malnutrition and hb levels in school-aged children are likely to be underestimated.

### Bayesian hierarchical model of haemoglobin

For this model, haemoglobin level for each child  $i$  ( $i = 1, \dots, N$ ) in school  $j$  ( $j = 1, \dots, N$ ) is considered a normal variable outcome  $Y_{ij}$  in the form:

$$Y_{i,j} \sim \text{Normal}(\mu_{i,j}, \sigma^2)$$

$$\mu_{i,j} = \alpha + \sum_{k=1}^K \beta_k X_{i,j,k} + \sum_{l=1}^L \beta_l X_j + \beta_f u_j + \beta_g v_j + w_j$$

where  $\alpha$  is the intercept,  $\sum_{k=1}^K \beta_k X_{i,t,k}$  the matrix of individual-level covariates,  $\sum_{l=1}^L \beta_l X_j$  the matrix of school-level covariates,  $u_j$  is considered a dummy variable labelled  $u_j=1$  when prevalence of wasting is predicted to be medium/high severity (5-15%) and  $v_j$  a dummy variable labelled  $v_j=1$  when prevalence of wasting is predicted to be extremely high (>15%) and  $w_j$  is a geostatistical random effect modelled using an isotropic, stationary exponential decay function:  $f(d_{ab}; \phi) = \exp[-(\phi d_{ab})]$  where  $d_{ab}$  is the straight-line distance between pairs of school locations  $a$  and  $b$ , and  $\phi$  is the rate of decline of spatial correlation. Non-informative priors were used for  $\alpha$  and the coefficients (normal prior with mean 0 and precision 1 x 106), the prior distribution of  $\phi$  was uniform with upper and lower bounds set at 1 and 50 and the precision of  $v_j$  was given a non-informative gamma distribution. Values of  $u_j$  and  $v_j$  at each model iteration are defined by a random variable  $Z_j$ , which is given an informative beta prior defined using the posterior mean and standard deviation of predicted prevalence of wasting (described above):

$$Z_j \sim \text{Beta}(\alpha_j, \beta_j)$$

$$0.05 > Z_j > 0.15, \quad u_j=1$$

$$0.15 > Z_j > 0.15, \quad v_j=1$$

Following a burn-in of 9,000 iterations, the values for the intercept and coefficients were stored for 1,000 iterations and model convergence was assessed using diagnostic tests for convergence and by visually inspecting the time series plots. Convergence was successfully achieved after 10,000, and the model was



run for a further 10,000 iterations with thinning every ten iterations, during which prediction locations were stored.

Model output therefore consisted of samples from the posterior distribution hb levels for individuals and summarised by school (mean Hb).

### Model adjusted Population Attributable Risk Fractions (PAFs)

In general, analysis of adjusted PAFs for binary outcomes such as anaemia rely on using the adjusted odds ratios (ORs) resulting from binomial GLMs. Whilst regional PAFs can be estimated using this approach based on the spatial distribution of each risk factor by region, it cannot take into account spatial variation in the underlying haemoglobin levels of resident children and thus assumes the impact of each risk factor is constant. For this reason, we chose to use a two step process that explicitly considers variation in underlying haemoglobin levels to estimate PAFs for anaemia by Province across Kenya, as outlined below.

At each realisation of the Bayesian hierarchical model for haemoglobin, the mean hb level ( $\mu_j$ ) was estimated at each school for a baseline group (7 year old boys and 14 year old girls, in socio-economic quantiles 2-4) and for each risk group included in Table 4 (main text), including school-level covariates (SF status) and the geostatistical random error term ( $w_j$ ). The normal cumulative distribution function (CDF) was then used to estimate the prevalence of anaemia (i.e. the proportion of children with hb levels lower than age- and sex-standardised cut-offs) for baseline and risk groups based on predicted  $\mu_j$  and the modelled within-school standard deviation  $\sigma^2$ , and the adjusted relative risk (RR) for each risk factor estimated. In order to produce internally valid estimates when using adjusted RRs, the method proposed by Kelinbaum *et al*<sup>(52)</sup> (see<sup>(31)</sup> for discussion) was used to estimate the adjusted PAFs:

$$\text{PAF} = \sum_{i=0}^k pd_i \left( \frac{RR_i - 1}{RR_i} \right)$$

where  $pd_i$  is the proportion of cases falling into the  $i$ th exposure level, and is calculated as the observed school-level prevalence in either boys aged 6-8 years or girls aged 13-15, and  $RR_i$  is the relative risk the  $i$ th

1 exposure level with the unexposed group. School-level PAFs were then aggregated and summarised by  
 2 Province. Model output therefore consisted of samples from the posterior distribution of Province mean  
 3 PAFs for each risk factor.  
 4  
 5  
 6  
 7  
 8  
 9

## 10 **Model Validation**

11  
 12 To assess the predictive performance of the final model of Hb, and associated predicted prevalence of Hb,  
 13 hold-out validation data subsets were generated by random division of the data into quintiles. The  
 14 Bayesian geostatistical model was then trained on four subsets whilst simultaneously predicting  
 15 haemoglobin for the fifth, excluded subset. This was repeated for each subset, giving and observed and  
 16 predicted Hb value for all surveyed individuals. The ability of the model to predict known mean Hb (and  
 17 associated prevalence of anaemia) was assessed by three validation statistics: mean prediction error  
 18 (which provides a measure of the bias of the predictor); absolute mean prediction error (which provides a  
 19 measure of the accuracy of the predictor); and the correlation coefficient (providing a measure of  
 20 association between observed and predicted Hb values).  
 21  
 22  
 23  
 24  
 25  
 26  
 27  
 28  
 29  
 30  
 31  
 32  
 33  
 34

35 Results of this model validation process are shown below in Table S2. When summarised by school, there  
 36 was a very high degree of correlation between observed and expected mean Hb. Mean error and absolute  
 37 mean error of the anaemia predictions was -6%, suggesting that the model consistently over-predicted  
 38 prevalence. At an individual level the model was less successful, on average producing a 10 g/L  
 39 discrepancy between predicted and observed Hb levels. This difference between school and individual  
 40 level predictive validity is reflective of the large residual variation between individuals within schools  
 41 indicated by the model (Table 2).  
 42  
 43  
 44  
 45  
 46  
 47  
 48  
 49  
 50

51 **Table S2:** Measures of correlation, bias and accuracy of Bayesian hierarchical regression models at individual and school  
 52 levels.

| 53 Outcome           | 54 Mean error | 55 Absolute mean error | 56 Correlation coefficient |
|----------------------|---------------|------------------------|----------------------------|
| 57 Individual-level: |               |                        |                            |
| 58 Hb level, g/L     | - 0.005       | + 10.15                | 0.392                      |
| 59 Anaemia           | + 0.042       | + 0.364                | 0.298                      |
| 60 School-level:     |               |                        |                            |
| Mean Hb, g/L         | - 1.74        | +1.79                  | 0.982                      |

1  
2  
3  
4  
5  
6  
7  
8  
9  
10  
11  
12  
13  
14  
15  
16  
17  
18  
19  
20  
21  
22  
23  
24  
25  
26  
27  
28  
29  
30  
31  
32  
33  
34  
35  
36  
37  
38  
39  
40  
41  
42  
43  
44  
45  
46  
47  
48  
49  
50  
51  
52  
53  
54  
55  
56  
57  
58  
59  
60

---

|                          |         |        |       |
|--------------------------|---------|--------|-------|
| Prevalence of anaemia, % | - 0.061 | +0.065 | 0.951 |
|--------------------------|---------|--------|-------|

---

For peer review only

1  
2  
3  
4  
5  
6  
7 **Estimating the relative contribution of parasitic infections and nutrition for anaemia**  
8  
9 **among school-aged children in Kenya: a subnational geostatistical analysis**  
10

11 Rachel L Pullan<sup>1</sup>, Carol Gitonga<sup>1,2</sup>, Charles Mwandawiro<sup>3</sup>, Robert W Snow<sup>2,4</sup> and Simon J Brooker<sup>1,2</sup>  
12

13  
14 <sup>1</sup> *London School of Hygiene and Tropical Medicine, London, UK*

15 <sup>2</sup> *Kenya Medical Research Institute-Wellcome Trust Research Programme, Nairobi, Kenya;*

16 <sup>3</sup> *Eastern and Southern Africa Centre of International Parasite Control, Kenya Medical Research Institute*  
17 *(KEMRI), Nairobi, Kenya*

18 <sup>4</sup> *Centre for Tropical Medicine, Nuffield Department of Clinical Medicine, University of Oxford, Oxford, UK*  
19

20 **Correspondence:** [rachel.pullan@lshtm.ac.uk](mailto:rachel.pullan@lshtm.ac.uk); Faculty of Infectious and Tropical Diseases, London School  
21  
22 of Hygiene and Tropical Medicine, Keppel Street, London WC1E 7HT  
23  
24  
25  
26  
27  
28  
29  
30  
31  
32  
33  
34  
35  
36  
37  
38  
39  
40  
41  
42  
43  
44  
45  
46  
47  
48  
49  
50  
51  
52  
53  
54  
55  
56  
57  
58  
59  
60

## Abstract

**Objectives:** To quantify geographical variation in the relative contribution of parasitic infections, socio-economic factors and malnutrition in the aetiology of anaemia among school children across Kenya, thereby providing a rational basis for the targeting of an integrated school health package.

**Design:** Nationally representative cross-sectional survey data were collected using standard protocols. For all included children, data were recorded on haemoglobin concentration and common parasitic infections (*Plasmodium falciparum*, hookworm and schistosomiasis) and socio-economic indicators. Ecological proxies of malnutrition and food security were generated using Demographic and Health Survey and UN Food and Agriculture Organization food security data respectively. Spatially explicit, multilevel models were used to quantify impact upon child haemoglobin concentration.

**Setting:** Randomly selected schools in ecologically diverse settings across Kenya.

**Main outcome measures:** Mean haemoglobin concentration adjusted for infection, nutritional and socio-economic risk factors; associated risk ratios and adjusted Population Attributable Fractions (PAFs) for anaemia, by region.

**Results:** Data were available for 16,941 children in 167 schools; mean Hb was 122.1 g/L and 35.3% of children were anaemic. In multivariate analysis, mean Hb was significantly lower in boys and younger children. Severe malnutrition and interactions between *P. falciparum* and hookworm infections were significantly associated with lower Hb, with greater impacts seen for co-infected children. The contribution of risk factors to anaemia risk varied by province: in 14 year old girls PAFs ranged between 0-27.6% for *P. falciparum*, 0-29.0% for hookworm and 0-18.4% for severe malnutrition.

**Conclusions:** The observed geographical heterogeneity in the burden of anaemia attributable to different aetiological factors has important implications for the rational targeting of anti-anaemia interventions that can be included into an integrated school health programme.

## Article Summary

### Article Focus

- Cross-sectional haematological and parasitological school survey data for the period 2008-2010 in Kenya
- Spatially-explicit, Bayesian multi-level models quantifying impact of infection, nutrition and social risk factors on child haemoglobin concentration and adjusted Population Attributable Fractions for anaemia by province.
- Implications of spatial heterogeneity in underlying haemoglobin status and risk factors for cost-effective geographical targeting of [school-based anti-anaemia interventions, including deworming, malaria control and school feeding.](#)

### Key messages

For school-aged children living in Kenya:

- *P. falciparum*, hookworm and schistosomes are all significantly associated with lower mean Hb, with the largest impact seen for coinfection with hookworm and *P. falciparum*, emphasising the importance of parasitic infections in the aetiology of anaemia in African school-age populations
- Poor food intake is suggested to be an important contributor to anaemia in school-aged children.
- There is pronounced geographical heterogeneity in the burden of anaemia attributable to these identified risk factors underscoring importance of appropriately targeting interventions

### Strengths and limitations of the study

- Large and uniquely detailed dataset coupled with novel Bayesian modelling framework that allowed for simultaneous quantification of the mean shift in Hb associated with each risk factor, and sub-national risk of anaemia in school-aged children attributable to risk factors.
- Dependence upon cross-sectional design and ecological data limits inference of causality; incorporation of individual, nutritional-related factors and iron status indicators would improve quantification of their involvement.

## Background

Children of school-going age (5-14 years) make up one quarter of the population of sub-Saharan Africa,<sup>1</sup> and the proportion of these children attending school has never been higher, in large part due to recent global and national commitments to universal primary education school enrolment.<sup>2</sup> Yet many children enrolled in school suffer from poor health and malnutrition and as a result are less likely to attend and complete school or achieve their full educational potential.<sup>3</sup> For example, up to 40% of 5-14 year olds are estimated to be anaemic,<sup>4,5</sup> which can affect cognition and learning.<sup>6,7</sup> Anaemia also affects the health of older girls as they reach puberty, potentially impacting upon future motherhood and the nutrition of the next generation of learners.<sup>8,9</sup> Fortunately, a number of simple and cost-effective interventions are available to avert the burden of anaemia, including malaria control,<sup>10,11</sup> deworming,<sup>12</sup> iron supplementation<sup>13,14</sup> and school-feeding<sup>15</sup> – interventions which are increasingly delivered as part of an integrated school health package.<sup>16</sup>

Identifying the optimal combination of school health interventions requires reliable information on both the geographical distribution of anaemia and the relative contribution of different aetiological factors. A previous study of anaemia among preschool children in West Africa employed a geostatistical framework to interpolate estimates of anaemia among children aged 1-4 years collected through demographic health surveys (DHS), whilst incorporating ecological predictions of malaria and helminth infection. Whilst this work helped define the geographical distribution and limits of anaemia in the region it did not quantify spatial variation in the risk attributable to different aetiological factors.<sup>17</sup> Here we take advantage of uniquely detailed haematological data collected during a comprehensive, national school health survey conducted across Kenya between 2008 and 2010.<sup>18</sup> An initial analysis showed that the relative contribution of *Plasmodium falciparum* [to anaemia](#) varied according to malaria transmission zones.<sup>19</sup> We extend this to investigate the relationships between haemoglobin concentration (Hb) and common parasitic infections (including *P. falciparum*, hookworm and schistosomes), socio-economic indicators and proxies of malnutrition and food security for school children across Kenya. We use an innovative Bayesian approach that quantifies the mean shift in Hb associated with each risk factor, which we use to

1  
2  
3  
4  
5  
6  
7 estimate sub-national variation in the risk of anaemia in school-aged children attributable to malnutrition,  
8 malaria and helminths to define targets for integrated packages of school-health interventions.  
9

## 10 11 12 13 **Methods**

### 14 15 **School survey data:**

16  
17 This study uses cross-sectional school survey data collected between September 2008 and March 2010  
18 using standard protocols, described elsewhere.<sup>18,20</sup> In brief, 480 government primary schools were  
19 selected to provide a national assessment of malaria and anaemia among school children. In a random  
20 subset of 167 schools, stool and urine samples were also collected to assess prevalence and intensity of  
21 helminth infections. At each school, 10 children plus 1 reserve of each sex were randomly selected from  
22 each of classes 2-6 from the children present that day. [This captures children aged 4 to 16, although 80%](#)  
23 [of included children were aged between 8 and 13 years.](#) Selected children were asked to provide a  
24  
25  
26  
27  
28  
29  
30  
31  
32  
33  
34  
35  
36  
37  
38  
39  
40  
41  
42  
43  
44  
45  
46  
47  
48  
49  
50  
51  
52  
53  
54  
55  
56  
57  
58  
59  
60  
fingerprick blood sample, which was used to assess haemoglobin (Hb) using a portable photometer  
(Haemocue, Angelholm, Sweden) and *Plasmodium* infection in the peripheral blood based on microscopy-  
corrected malaria rapid diagnostic test (RDT)<sup>18</sup> results, [whereby slides were subsequently read for all RDT](#)  
[positives.](#) Children in all schools were asked to provide stool samples which were examined for the eggs of  
intestinal nematodes (*Ascaris lumbricoides*, *Trichuris trichiura* and hookworm species) and *S. mansoni*  
using the Kato-Katz method. In schools on the coast, where *Schistosoma haematobium* is widespread,  
children were asked to provide urine samples which were examined by urine filtration. A questionnaire  
was administered to all pupils to obtain data on insecticide-treated net ownership and use, history of  
anthelmintic medication, key socioeconomic variables, household construction and education of the  
child's parent/guardian. School locations were determined using a hand-held Global Positioning System  
and classified as urban using an updated 2010 urban extents (UE) mask derived from GRUMP.<sup>21,22</sup>

### 50 51 **Nutritional proxy data**



1  
2  
3  
4  
5  
6  
7 Anthropometric and food intake data were not available for all of our study population, and we instead  
8 relied on ecological measures. Proxy data for macro-nutritional status in school-aged children were  
9 derived from the Kenya 2008-09 Demographic and Health Survey (DHS).<sup>23, 24</sup> Anthropometric  
10 measurements were extracted for children ≤5 years and for women of child-bearing age (ages 15 to 49)  
11 (see Table 1). For children ≤5 years, the reported proportion consuming food rich in iron (flesh and organ  
12 meat) in the past 24 hours was also extracted. These indicators, which provide a general measure of  
13 nutritional status in the wider community, were geo-located to the centre of each sampling cluster.  
14  
15 Bayesian kriging<sup>25</sup> [a geostatistical interpolation method that accounts for the error introduced by](#)  
16 [estimating the semivariogram model \(a function of the variability in outcome against the distance](#)  
17 [separating observation points\)](#), was used to interpolate a distribution of possible values for each indicator  
18 to survey school locations. [This was done by incorporating the full posterior distribution of the Bayesian](#)  
19 [semivariogram model, estimated](#) -using the Bayesian statistical software WinBUGS version 14.1 (Medical  
20 Research Council Biostatistics Unit and Imperial College London). Mean predicted prevalence values were  
21 then categorised according to WHO-defined cut-off values for severity of malnutrition by prevalence  
22 range (Table 1). See Technical Appendix for further details.  
23  
24  
25  
26  
27  
28  
29  
30  
31  
32  
33  
34

35 Two additional indicators were used to describe general food availability at each school location:  
36 predominant source of livelihood (based on 2010 FAO Livelihood zones<sup>26, 27</sup>); and food security conditions  
37 at the time of the survey (based on the FAO Food Insecurity Severity Scale<sup>27, 28</sup>). Both indicators were  
38 obtained from the Famine Early Warning System Network (FEWS NET; <http://www.fews.net>). Information  
39 on the intended provision of formal, government-run school-feeding programmes was abstracted from  
40 the Homegrown School Meals Programme (HGSM) and the Emergency HGSM 2010 registers provided  
41 by the Kenya Ministry of Education (*personal communication*).  
42  
43  
44  
45  
46  
47  
48

#### 49 **Analysis**

50  
51  
52  
53  
54  
55  
56  
57  
58  
59  
60

1  
2  
3  
4  
5  
6  
7 A schematic summarising the major steps in our analysis strategy is provided in Figure 1. Haemoglobin  
8 levels were adjusted for altitude and individuals were classified as anaemic using age and sex specific cut-  
9 offs.<sup>29</sup> Children were classified as having medium/high intensity hookworm infection if infection intensity  
10 exceeded 100 epg, and medium/high intensity *S. haematobium* infection if infection intensity exceeded  
11 500 epg (both representing the top 10<sup>th</sup> percentile). Reported information on ownership of household  
12 assets and household construction was used to generate wealth indices using principle component  
13 analysis,<sup>30</sup> and resulting scores were divided into quintiles.

14  
15  
16  
17  
18  
19  
20  
21 The initial candidate set of predictor variables for univariate analysis included age, sex, relative socio-  
22 economic status, education-level of the household head, protective behaviours (bednet usage and  
23 deworming) and infection status with hookworm, schistosome and *P. falciparum*, in addition to school-  
24 level ecological covariates including urban/rural location, predicted prevalence of anthropometric  
25 indicators in younger children and women of reproductive age, livelihood zone and food security status  
26 and intended provision of school-feeding. In order to select candidate variables for spatial multivariable  
27 analysis, univariate analysis was undertaken using logistic regression (criteria: Wald test  $P < .1$ ) using Stata  
28 11.1 software (StataCorp). Standard errors were adjusted for dependence between individuals within  
29 schools using a clustered sandwich estimator.<sup>31</sup> Backward-stepwise elimination was then used to generate  
30 a minimum adequate multivariate model; excluded covariates ( $P > .05$ ) were retested in the minimal  
31 model to confirm lack of association. [Basic age-sex interaction terms were also investigated, but there](#)  
32 [was insufficient evidence that these improved the overall fit of the model.](#)  
33  
34  
35  
36  
37  
38  
39  
40  
41  
42  
43

44 Retained covariates were included in a spatial multivariable Bayesian mixed-effects linear regression  
45 model using WinBUGs 14.1. This model included individual and school-level ecological fixed effects and a  
46 school-level geostatistical random effect (using an isotropic, stationary exponential decay function),<sup>25</sup>  
47 thereby incorporating a degree of spatial smoothing. Uncertainty in the predicted prevalence of  
48 anthropometric proxy indicators was incorporated by modelling these covariates as random variables  
49  
50  
51  
52  
53  
54

1  
2  
3  
4  
5  
6  
7 with a beta distribution, defined using the prediction posterior distribution. At each model realisation,  
8 malnutrition was categorised as either low, medium/high or severe for each school location, according to  
9 Table 1.  
10

11  
12  
13  
14 Given the large observed differences in mean Hb and prevalence of predictors by region and demographic  
15 group, adjusted [Population Attributable Fractions \(PAFs\)](#) for anaemia were estimated for two indicator  
16 demographic groups (boys aged 7 years, and girls aged 14 years) for each province in Kenya. In brief, at  
17 each model realisation we estimated the prevalence of anaemia in each of the risk groups based upon the  
18 posterior mean and standard deviation of the Hb distribution within each school. These were used to  
19 estimate (i) the relative risk of anaemia for each risk group compared with baseline risk, and (ii) the  
20 associated adjusted PAF, as described by Rockhill *et al* (1998).<sup>32</sup> Estimates were subsequently  
21 summarised by province. Full statistical notation of Bayesian geostatistical modelling, PAF and model  
22 validation procedures are presented in Technical Appendix. Model validation using hold out datasets,  
23 presented in detail in the accompanying Technical Appendix, suggest very high degree of correlation at  
24 the school level between observed and expected mean Hb levels ( $R^2 > 0.98$ ), and prevalence of anaemia  
25 ( $R^2 > 0.95$ ) suggesting the approach we used to estimate anaemia prevalence (and associated attributable  
26 fractions) was appropriate.  
27  
28  
29  
30  
31  
32  
33  
34  
35  
36  
37  
38  
39  
40

#### 41 **Results:**

42  
43 Data on Hb, malaria parasitaemia and helminth infection were available for 16,941 children (aged 5-16) in  
44 167 schools (Figure 2). Mean altitude-adjusted Hb concentration was 122.1 g/L, with 35.3% of children  
45 estimated to be anaemic. The spatial distribution of the unadjusted Hb data is presented in Figure 2,  
46 summarised by school. There were significant geographical heterogeneity in mean Hb across the country  
47 (Moran's  $I$   $p < 0.001$ ), with the lowest average levels observed in Coast Province (120.1 g/L) and the highest  
48 in Central Province (134.0 g/L). Univariate analysis suggested that Hb levels increased with age and with  
49  
50  
51  
52  
53  
54

1  
2  
3  
4  
5  
6  
7 relative socio-economic status, and were significantly lower in individuals infected with *P. falciparum* or  
8 medium/high intensity helminth infections (Table 1). Hb was also significantly lower in areas with  
9 predicted severe malnutrition, although there was no ecological relationship with predicted consumption  
10 of iron rich foods. Univariate analysis also suggests a relationship between Hb and food availability, with  
11 significantly lower Hb levels in children living in very food insecure areas.  
12  
13  
14

### 15 16 17 18 **Bayesian hierarchical model of haemoglobin**

19  
20 Table 3 presents a multivariate analysis of factors associated with Hb levels. On average, boys had lower  
21 mean Hb compared with girls by 1.53 g/L (95% BCI: 1.13-1.94 g/L), and older children tended to have  
22 higher Hb levels, increasing 1.08 g/L (95% BCI: 0.99-1.17 g/L) each yearly age interval. There was strong  
23 evidence for a multiplicative negative interaction between infection status and Hb levels, highlighting the  
24 health impacts of parasitic infections in school-aged children. Children with medium/high intensity  
25 hookworm infection had Hb levels 1.03 g/L (95% BCI: 0.02-2.00 g/L) lower than uninfected children, those  
26 with *P. falciparum* malaria 3.00 g/L (95% BCI: 1.68-4.29 g/L) lower and *S. haematobium* infection 1.75 g/L  
27 (95% BCI: 0.60-2.92 g/L); children co-infected with both *P. falciparum* malaria and medium/high intensity  
28 hookworm infection had Hb levels 5.56 g/L (95% BCI: 2.67-8.64 g/L) lower than uninfected children.  
29  
30  
31  
32  
33  
34  
35

36  
37  
38 Proxy measures of nutritional status were also strongly associated with Hb levels. School-children living in  
39 areas predicted to have severe prevalence of wasting had Hb levels that were on average 9.74 g/L (95%  
40 BCI: 7.45-12.16 g/L) lower than those living in low risk areas. School-feeding programmes also appear to  
41 have been targeted to districts with increased risk of anaemia, although examination of the 95% credible  
42 intervals suggests no statistical difference within target districts between mean Hb levels in schools with  
43 and without intended provision of formal school-feeding programmes. Perhaps surprisingly, food security  
44 at the time of the survey (a qualitative measure that allows adjustment for acute conditions and the  
45 impact of seasonality) was not associated with Hb levels in multivariate analysis. Similarly, after  
46  
47  
48  
49  
50  
51  
52  
53  
54  
55  
56  
57  
58  
59  
60

1  
2  
3  
4  
5  
6  
7 accounting for all other factors in the model, relative socio-economic status was not significantly  
8 associated with Hb levels.  
9

10  
11  
12 The random effects variance components from this model indicate that most of the residual variation  
13 remains between children within schools: of the total unexplained variability in Hb, 13.8% occurred at the  
14 school level, whilst 86.2% occurred between children within schools. Closer examination of the spatial  
15 school-level random effect suggests that, after accounting for included predictors, most schools (81%) had  
16 similar Hb levels that could not be distinguished statistically (shown in green in Figure 23). There was  
17 however some residual spatial clustering of schools with higher/lower than expected Hb levels (foci radii  
18 of ~190 km, Table 2) with significantly lower mean Hb levels observed in schools in the far south of Coast  
19 Province and in Nyanza and Western provinces (Figure 3). Interestingly, comparison of observed  
20 prevalence of *P. falciparum* and medium/high intensity hookworm suggests that prevalence of both  
21 infections was higher for these schools than for other schools in these provinces (*P. falciparum* Kruskal-  
22 Wallis  $p$  0.02; medium/high intensity hookworm Kruskal-Wallis  $p$  0.01). In contrast, mean Hb levels were  
23 significantly higher for schools in Rift Valley, Central and Eastern provinces  
24  
25  
26  
27  
28  
29  
30  
31  
32  
33  
34  
35

### 36 **Adjusted Population Attributable Risk Fractions**

37  
38 Using the final Bayesian hierarchical model, we estimated for two demographic groups (girls aged 14  
39 years, and boys aged 7 years) the PAF of anaemia due to *P. falciparum*, medium/high intensity hookworm  
40 infection, medium/high intensity *S. haematobium* infection, and acute malnutrition (prevalence of  
41 wasting in under 5s exceeding 15%) for each province in Kenya, adjusting for all other included predictors  
42 (Table 4). Our results suggest that the relative contribution of each risk factor varies considerably by  
43 province. For example, in Coast Province 13% (95% BCI: 4-23%) of anaemia in 14 year old girls attending  
44 school may be attributable to medium/high intensity hookworm, comparing with 6% (95% BCI: 2-10%) to  
45 *P. falciparum* infection and 3.1% (95% BCI: 0-8%) to schistosomiasis. Meanwhile, results suggest that  
46 reduction in acute malnutrition in Coast Province (to <5% wasting in ≤5s) would reduce anaemia  
47  
48  
49  
50  
51  
52  
53  
54

1  
2  
3  
4  
5  
6  
7 prevalence by 19% (95% BCI: 0-38%). This contrasts with Western Province, where the estimated risk of  
8 anaemia attributable to medium and high intensity hookworm is 29% (95% BCI: 1-55%) and to *P.*  
9 *falciparum* 24% (95% BCI 0-41%); no school children in this district are exposed to *S. haematobium* and  
10 acute malnutrition in under 5s is predicted not to exceed 5%. The wide 95% BCIs observed reflect (i) the  
11 smaller sample sizes for provinces other than Coast (given that N = schools, not individuals), and (ii) the  
12 additional uncertainty surrounding proxies for malnutrition. Trends in PAFs observed for predictors in 7  
13 year old boys mirror those for older girls but are generally lower, a reflection of the lower baseline Hb  
14 levels in this group.  
15  
16  
17  
18  
19  
20  
21  
22  
23  
24

## 25 Discussion

26  
27 As global commitment and resources for school health and nutrition initiatives grow,<sup>16</sup> there is an urgent  
28 need to strengthen our understanding of the likely impact of interventions aimed at tackling important  
29 health and development outcomes such as anaemia. This requires a detailed understanding of the relative  
30 contribution of aetiological factors at policy relevant scales. Here we present a uniquely detailed national  
31 analysis of risk factors for anaemia among schoolchildren in 167 schools across Kenya. We introduce a  
32 new approach using multilevel linear modelling to provide a detailed description the varying contribution  
33 of risk factors by administrative unit (province), whilst fully accounting for spatial variation in underlying  
34 mean Hb. Results provide a vital decision-making tool for cost-effective targeting the delivery of  
35 integrated, packages of interventions tailored to each province, with the aim of reducing anaemia in  
36 schoolchildren. [For example, school-feeding programmes in Coast, Eastern and Rift Valley pProvinces may  
37 want to consider including iron-rich food stuffs, whilst programmes in Nyanza and Western pProvinces  
38 omitting malaria control initiatives may not see desired improvements in childhood anaemia."](#)  
39  
40  
41  
42  
43  
44  
45  
46  
47  
48  
49

50 Our analysis found evidence that *P. falciparum*, hookworm and schistosomes were each significantly  
51 associated with lower mean Hb, observations consistent with current knowledge. Such findings  
52  
53  
54

1  
2  
3  
4  
5  
6  
7 corroborate recent results from the Global Burden of Disease study, which suggests that globally for  
8 anaemia 10.2% of years lived with a disability (YLD) across all ages could be attributed to hookworm,  
9 17.9% to malaria and 3.4% to schistosomiasis.<sup>33</sup> Our analysis provides three additional insights into the  
10 epidemiology of anaemia. First, we confirm small-scale studies<sup>34-38</sup> that have suggested that coinfection  
11 with hookworm and *P. falciparum* may have a multiplicative effect on Hb level – effects which occur  
12 across Kenya. Second, we demonstrate pronounced geographical heterogeneity in the burden of anaemia  
13 attributable to identified risk factors. Associations for hookworm and *P. falciparum* were most  
14 pronounced in Western Province, where results suggest that together these two infections were  
15 attributable for close to 53% (95% BCI: 1.4-96.0%) of anaemia cases in girls aged 14 years. Together, these  
16 findings emphasise the importance of parasitic infections in the aetiology of anaemia in school-aged  
17 children and underscore current efforts to control helminths and malaria as part of integrated school  
18 health programmes.<sup>39, 40</sup> The PAFs provided here are useful for translating our findings into numbers that  
19 can help policy decision makers appreciate the potential benefits of carefully targeted programmes  
20 tailored to each province that strike the best balance between dietary interventions, deworming and  
21 malaria control.<sup>17, 41</sup>

22  
23  
24  
25  
26  
27  
28  
29  
30  
31  
32  
33  
34  
35 Third, whilst acknowledging that we rely on proxy indicators, our results do suggest that poor food intake  
36 is an important contributor to anaemia in school children: the final model indicates that in communities  
37 where acute malnutrition is a severe public health problem (i.e. where wasting in under 5s exceeds 15%),  
38 mean Hb levels in school-aged children are on average 9.7 g/L lower than well nourished communities,  
39 and as such eliminating acute malnutrition as a public health problem could avert close to 20% of anaemia  
40 cases in 14 year old girls. This is consistent with limited evidence from smaller individual-level studies  
41 suggesting an association between under-nutrition and anaemia in school-aged populations.<sup>42, 43</sup> Our  
42 results also provide some indication that whilst existing school feeding programmes in Kenya do appear  
43 to be targeted to those at most need, they are currently ineffective at tackling anaemia in this population.  
44  
45  
46  
47  
48  
49  
50  
51  
52  
53  
54

1  
2  
3  
4  
5  
6  
7 Our spatially explicit hierarchical approach seeks to maximise the usefulness of this observational, cross-  
8 sectional data and results show that whilst much of the between school variation could be explained by  
9 included risk factors, a high degree of variation does still remain within schools. This suggests that there  
10 are individual-level factors beyond those measured that still need to be considered. In addition to  
11 individual iron status or food intake there are a number of candidates. HIV-infection is potential likely to  
12 be a contributor, as even in asymptomatic HIV infected individuals anaemia is a common manifestation.<sup>44</sup>  
13  
14  
15  
16  
17 <sup>45</sup> We were also unable to account for genetic traits such as sickle-cell and other haemoglobinopathies,<sup>46</sup>  
18 or for the potential effect of menarche in adolescent girls.<sup>47</sup>  
19  
20  
21  
22

23 A number of additional study limitations should also be acknowledged. As we have previously  
24 acknowledged,<sup>20</sup> cross-sectional studies such as this are inevitably subject to a number of limitations  
25 including the potential of ecological fallacy, especially when incorporating population-level estimates. We  
26 acknowledge that our indicator of school-feeding (inclusion in the government school-feeding registers) is  
27 far from optimal, and the study would have benefitted from detailed individual-level data on iron status  
28 and food intake. In addition, modelled associations are likely to be lower than the true impact, due to  
29 non-systematic measurement error in our infection indicators, which rely on single samples using  
30 standard parasitological diagnosis with <100% sensitivity.<sup>48,49</sup> Despite a robust stratified random sampling  
31 frame, our results may also be subject to some selection bias, as very ill children such as those with acute  
32 infections and severe chronic malnutrition may have been absent on the day of the school survey and  
33 thus not included in the study sample. [Although contemporary regional or school-level attendance data is  
34 not available, overall school attendance rates are known to vary geographically across Kenya.<sup>50</sup> For  
35 example, in 2005 \(the most recent year for which sub-national net primary school attendance figures are  
36 available\) reported net attendance in Nyando District \(Nyanza Province\) was greater than 90% for both  
37 males and females, whilst in Turkana District \(Rift Valley Province\) levels were between 30-40%.<sup>50</sup> If Hb  
38 levels differ systematically between non-attending and attending school-aged children, this may act to  
39 either dilute or exaggerate geographical variation in Hb levels](#)  
40  
41  
42  
43  
44  
45  
46  
47  
48  
49  
50  
51  
52  
53  
54



1  
2  
3  
4  
5  
6  
7 ~~Neither is the~~ [An additional factor that would influence individual-level variation is the onset of menarche](#)  
8 [in girls: no specific data were collected to record this, and inclusion of a basic age-sex interaction term did](#)  
9 [not improve model fit suggesting that more detailed information is required. Finally, this](#) analysis is unable  
10 to account for the impact of recently cleared infections on current Hb status. ~~Finally, the current and the~~  
11 [presented](#) results represent a snapshot of the period 2008-2010 and it is conceivable that seasonality and  
12 intervention-related factors may have confounded results. However, the inclusion of mosquito net use,  
13 recent deworming or food security (a seasonal covariate) in multivariate models did not improve model  
14 fits, suggesting that temporal and control factors were relatively unimportant.

## 21 22 23 **Conclusions**

24  
25 A recent focus on school-child and adolescent health has emphasised the need to develop a deeper  
26 understanding of factors impacting health and development of this population group.<sup>51-54</sup> Here we  
27 present a novel two-step process to model Hb levels and then predict associated anaemia prevalence in  
28 different areas of Kenya. Our approach adds considerable value over and above what could be achieved  
29 modelling anaemia directly, and the adopted geostatistical Bayesian framework allows for propagation of  
30 uncertainty associated at each step (including generation of predicted ecological covariates) into the final  
31 confidence limits. Future expansion of this model could look at interpolating existing results to make  
32 predictions in non-surveyed areas, although this would require generation of values for all included  
33 individual-level covariates for each prediction location, increasing prediction uncertainty. Our results  
34 highlight the marked geographical heterogeneity in the burden of anaemia attributable to identified risk  
35 factors in Kenya, which has major implications for effective targeting of packages of school-based  
36 interventions. [We suggest that deworming can help tackle anaemia both in western and coastal Kenya,](#)  
37 [whereas malaria control is likely to have the greatest impact in western Kenya, whilst school-feeding](#)  
38 [programmes can help reduce anaemia in Coast, Eastern and Rift Valley provinces.](#) The priority now should  
39 be to explore in detail the health and educational impact of carefully designed integrated infection and  
40 nutritional interventions in this age group.  
41  
42  
43  
44  
45  
46  
47  
48  
49  
50  
51  
52  
53  
54  
55  
56  
57  
58  
59  
60

### Acknowledgements

We are very grateful to all the teachers, parents and especially children who participated in this survey and to the many facilitators and members of the survey teams who collected the data [and to Don Bundy for comments](#). The survey work was supported by the Wellcome Trust UK as part of fellowship support to SJB (#81673) and by the Division of Malaria Control, Ministry of Public Health and Sanitation through a grant from the Department for International Development (DfID) through the WHO Kenya Country Office to Dr AM Noor and Dr E Juma.

### Footnotes

**Contributors** RLP was responsible for designing and conducting analysis, interpretation, drafting and production of the final manuscript. CG contributed to the survey design, data assembly and cleaning and contributed to final manuscript. CM and RWS contributed to survey design, interpretation of results and contributed to final manuscript. SJB [designed the field surveys](#), provided scientific guidance and contributed to interpretation and preparation of the final manuscript. All authors read and approved the final manuscript.

**Funding** The fieldwork was supported by the Wellcome Trust UK and by the Division of Malaria Control, Ministry of Public Health and Sanitation. RLP acknowledges support of the Bill & Melinda Gates Foundation and CWG is supported by a Commonwealth Scholarship from the DfID. SJB is supported by a Wellcome Trust Senior Fellowship in Basic Biomedical Science (098045) and RWS is supported by a Wellcome Trust Principal Fellowship (079080).

**Competing interests** None.

**Data sharing statement:** The school survey dataset used for this analysis is available for download through the Global Atlas of Helminth Infection ([www.thiswormyworld.org](http://www.thiswormyworld.org)). The WinBUGs statistical code is available from the corresponding author at [rachel.pullan@lshtm.ac.uk](mailto:rachel.pullan@lshtm.ac.uk).

## References

1. United Nations Department of Economic and Social Affairs. World population prospects, 2010 revision; Available from: <http://esa.Un.Org/unpd/wpp/>.
2. Global Partnership for Education. All children learning: Report 2011. Global Partnership for Education; Available from: <http://allchildrenlearningreport.globalpartnership.org>
3. World Bank. Fresh: Focusing resources on education and school health. A fresh start to improving the quality and equity of education. UNESCO, UNICEF, WHO & World Bank; 2000
4. McLean E, Cogswell M, Egli I, Wojdyla D, de Benoist B. Worldwide prevalence of anaemia, WHO vitamin and mineral nutritional information system, 1993-2005. *Public Health Nutrition*. 2008;12(4):444-454.
5. Best C, Neufingerl N, van Geel L, van den Briel T, Osendarp S. The nutritional status of school-aged children: Why should we care? *Food and Nutrition Bulletin*. 2010;31(3):400-417.
6. Grantham-McGregor S, Ani C. A review of studies on the effect of iron deficiency on cognitive development in children. *Journal of Nutrition*. 2001 Feb;131(2S-2):649S-666S.
7. Fretham SJ, Carlson ES, Georgieff MK. The role of iron in learning and memory. *Advances in Nutrition*. 2011;2(2):112-121.
8. Scholl TO. Iron status during pregnancy: Setting the stage for mother and infant. *American Journal of Clinical Nutrition*. 2005;81(5):1218S-1222S.
9. Dharmalingam A, Navaneetham K, Krishnakumar CS. Nutritional status of mothers and low birth weight in india. *Maternal and Child Health Journal*. 2010;14(2):290-298.
10. Clarke SE, Jukes M, Njagi JK, Khasakhala L, Cundill B, Otido J, et al. Effect of intermittent preventive treatment of malaria on health and education in schoolchildren: A cluster-randomised, double-blind, placebo-controlled trial. *Lancet*. 2008;372(9633):127-138.
11. Leenstra T, Phillips-Howard PA, Kariuki SK, Hawley WA, Alaii JA, Rosen DH, et al. Permethrin-treated bed nets in the prevention of malaria and anemia in adolescent schoolgirls in western kenya. *American Journal of Tropical Medicine and Hygiene*. 2003;68(S86-S93).
12. Smith JL, Brooker S. The impact of hookworm infection and deworming on anaemia in non-pregnant populations: A quantitative update. *Tropical Medicine and International Health*. 2010;15(7):776-795.
13. Leenstra T, Kariuki SK, Kurtis JD, Oloo AJ, Kager PA, ter Kuile FO. The effect of weekly iron and vitamin a supplementation on hemoglobin levels and iron status in adolescent schoolgirls in western kenya. *European Journal of Clinical Nutrition*. 2009;63(2):173-182.
14. Gera T, Sachdev HP, Nestel P. Effects of iron supplementation on physical performance in children and adolescents: Systematic review of randomized controlled trials. *Indian Pediatrics*. 2007;44:15-24.
15. Bundy DAP, Burbano C, Grosh M, Gelli A, Jukes M, Drake L. *Rethinking school feeding: Social safety nets, child development and the education sector*. The World Bank: New York; 2009.
16. Bundy DAP. *Rethinking school health: A key component of education for all*. Washington: The World Bank; 2012.
17. Soares Magalhães RJ, Clements ACA. Mapping the risk of anaemia in preschool-age children: The contribution of malnutrition, malaria, and helminth infections in West Africa. *PLoS Medicine*. 2011;8(6):e1000438.
18. Gitonga C, Karanja P, Kihara J, Mwanje M, Juma E, Snow R, et al. Implementing school malaria surveys in kenya: Towards a national surveillance system. *Malaria Journal*. 2010;9(1):306.
19. Gitonga CW, Edwards T, Karanja PN, Noor AM, Snow RW, Brooker SJ. *Plasmodium* infection, anaemia and mosquito net use among school children across different settings in Kenya. *Tropical Medicine and International Health*. 2012;17(7):858-870.
20. Brooker S, Pullan RL, Gitonga CW, Ashton RA, Kolaczinski JH, Kabatereine NB, et al. *Plasmodium*-helminth coinfection and its sources of heterogeneity across east africa. *Journal of Infectious Diseases* 2012;205(5):841-852.
21. Balk DL, Deichmann U, Yetman G, Pozzi F, Hay SI, Nelson A. Determining global population distribution: Methods, applications and data. *Advances in Parasitology*. 2006;62:119-156.

- 1  
2  
3  
4  
5  
6  
7  
8  
9  
10  
11  
12  
13  
14  
15  
16  
17  
18  
19  
20  
21  
22  
23  
24  
25  
26  
27  
28  
29  
30  
31  
32  
33  
34  
35  
36  
37  
38  
39  
40  
41  
42  
43  
44  
45  
46  
47  
48  
49  
50  
51  
52  
53  
54  
55  
56  
57  
58  
59  
60
22. Balk D, Pozzi F, Yetman G, Deichmann U, Nelson A. The distribution of people and the dimension of place: Methodologies to improve the global estimation of urban extents. Urban Remote Sensing Conference; 2004; Available at: <http://www.iussp.org/Activities/wgc-urb/balk.pdf>
  23. Kenya National Bureau of Statistics, Measure DHS. Kenya: Dsh, 2008-09 - final report. Calverton, Maryland, USA: Measure DHS, ICF Macro; 2010
  24. Measure DHS. Kenya 2008-09 DHS data. Available from: <http://www.measuredhs.com>
  25. Diggle P, Moyeed R, Tawn J. Model-based geostatistics (with discussion). *Applied Statistics*. 1998;47:299-350.
  26. FEWSNET. Famine early warning system network (FEWSNET) livelihood zone map for Kenya. FEWSNET and USAID; 2011
  27. Grillo J, Holt J. Application of the livelihood zone maps and profiles for food security analysis and early warning: USAID FEWSNET; 2009
  28. FEWSNET. Famine early warning system network (FEWSNET) Kenya archive: Food security update. FEWSNET and USAID; 2011
  29. WHO. Iron deficiency anaemia: Assessment, prevention and control. A guide for programme managers. Geneva: World Health Organisation; 2001
  30. Filmer D, Pritchett LH. Estimating wealth effects without expenditure data--or tears: An application to educational enrollments in states of India. *Demography*. 2001;38(1):115-32.
  31. Williams RL. A Note on Robust Variance Estimation for Cluster-Correlated Data. *Biometrics*. 2000; 56: 645-6.
  32. Rockhill B, Newman B, Weinberg C. Use and misuse of population attributable fractions. *American Journal of Public Health*. 1998;88(1):15-19.
  33. Jasrasaria J, Murray CJL, Naghavi M. Global Burden of Disease 2010 Estimate: Strategy Report for Anaemia Envelope. [Unpublished report]. *Personal Communication* 2012.
  34. Brooker S, Akhwale WS, Pullan R, Estambale B, Clarke S, Snow RW, et al. Epidemiology of *Plasmodium*-helminth coinfection in Africa: Potential impact on anaemia and prospects for combining control. *American Journal of Tropical Medicine & Hygiene*. 2007;77:88-98.
  35. Pullan R, Brooker S. The health impact of polyparasitism in humans: Are we under-estimating the burden of parasitic diseases? *Parasitology*. 2008;1-12.
  36. Nkwo-Akenji TK, Chi PC, Cho JF, Ndamukong KKJ, Sumbele I. Malaria and helminth co-infection in children living in a malaria endemic setting of Mount Cameroon and predictors of anaemia. *Journal of Parasitology*. 2006;92(6):1191-1195.
  37. Midzi N, Mtapuri-Zinyowera S, Mapingure MP, Sangweme D, Chirehwa MT, Brouwer KC, et al. Consequences of polyparasitism on anaemia among primary school children in Zimbabwe. *Acta Trop*. 2010;115:103-111.
  38. Ezeamama EE, McGarvey ST, Acosta LP, Zierler S, Manalo DL, Wu H-W, et al. The synergistic effect of concomitant schistosomiasis, hookworm, and trichurias infections on children's anemia burden. *PLoS Negl Trop Dis*. 2008;2(6):e245.
  39. Bundy DAP, Shaeffer S, Jukes M, Beegle K, Gillespie A, Drake L, et al. School based health and nutrition programs. *Chapter 58 in "Disease Control Priorities for Developing Countries"*. 2006.
  40. Brooker S, Clarke S, Snow RW, Bundy DAP. Malaria in african schoolchildren: Options for control. *Transactions of the Royal Society of Tropical Medicine and Hygiene*. 2008;102(4):304-305.
  41. Rowe AK, Powell KE, Flanders WD. Why population attributable fractions can sum to more than one. *American Journal of Preventative Medicine*. 2004;26:243-249.
  42. Anumudu C, Adolami M, Igwe C, Nwagwu M, Keshinro O. Nutritional anaemia and malaria in pre-school and school-aged children. 2008;1(11-17).
  43. Daboné C, Delise HF, Receveur O. Poor nutritional status of schoolchildren in urban and peri-urban areas of Ouagadougou (Burkina Faso). *Nutrition Journal*. 2011;10:34.
  44. Calis JC, van Hensbroek MB, de Haan RJ, Moons P, Brabin BJ, Bates I. HIV-associated anemia in children: A systematic review from a global perspective. *AIDS*. 2008;22(10):1099-1112.
  45. Levine AM, Berhane K, Masri-Lavine L, Sanchez M, Young M, Augenbraun M, et al. Prevalence and correlates of anemia in a large cohort of HIV-infected women: Women's interagency HIV study. *Journal of Acquired Immune Deficiency Syndrome*. 2001;26:28-35.

- 1  
2  
3  
4  
5  
6  
7 46. Tolentino K, Friedman JF. An update on anaemia in less developed countries. *American Journal of Tropical Medicine and Hygiene*. 2007;77:44-51.
- 8 47. Leenstra T, Kakiuki SK, Kurtis JD, Oloo AJ, Kager PA, ter Kuile FO. Prevalence and severity of  
9 anaemia and iron deficiency: Cross-sectional studies in adolescent schoolgirls in western Kenya. *European  
10 Journal of Clinical Nutrition*. 2004;58(4):681-691.
- 11 48. Booth M, Vounatsou P, N'Goran E K, Tanner M, Utzinger J. The influence of sampling effort and  
12 the performance of the kato-katz technique in diagnosing *Schistosoma mansoni* and hookworm co-  
13 infections in rural Cote d'Ivoire. *Parasitology*. 2003;127(Pt 6):525-31.
- 14 49. Okell LC, Ghani AC, Lyons E, Drakeley C. Submicroscopic infection in *Plasmodium falciparum*  
15 endemic populations: A systematic review and meta-analysis. *Journal of Infectious Disease*.  
2009;15(10):1509-1517.
- 16 50. World Bank. World development report 2007: Development and the next generation.  
17 Washington: The World Bank
- 18 51. Education and Policy Data Center. Kenya 2005 District Primary Education Profiles. Available From:  
19 [www.epdc.org/country/kenya](http://www.epdc.org/country/kenya)
- 20 52. Little AW, Green A. Successful globalisation, education and sustainable development.  
21 *International Journal of Education and Development*. 2009;29:166-174.
- 22 53. Sawyer SM, Afifi RA, Bearinger LH, Blakemore S-J, Dick B, Ezech AC, et al. Adolescence: A  
23 foundation for future health. *The Lancet*. 2012;379(9826):1630-1640.
- 24 54. Kleinbaum DG, Kupper LL, Morgenstern H. Epidemiological research. Belmont, CA: Lifetime  
25 Learning Publications; 1982. p. 163.
- 26  
27  
28  
29  
30  
31  
32  
33  
34  
35  
36  
37  
38  
39  
40  
41  
42  
43  
44  
45  
46  
47  
48  
49  
50  
51  
52  
53  
54  
55  
56  
57  
58  
59  
60

1  
2  
3  
4  
5  
6  
7 **Figure legends:**

8 **Figure 1 Schematic of adopted analysis strategy.** The dual aim of this analysis strategy was to (i) model  
9 the impact of risk factors on children's haemoglobin (Hb) levels, and (ii) estimate the adjusted Population  
10 Attributable Risk Fraction (PAF) associated with important, modifiable risk factors. This process was  
11 repeated at each realisation of the Bayesian hierarchical model to provide posterior mean estimates and  
12 credible intervals for all parameters of relevance.

13 **Figure 2 Spatial distribution of mean haemoglobin distribution across Kenya, by school.** HB is adjusted  
14 for altitude, population density (persons / km<sup>2</sup>) is shown for reference.

15 **Figure 3 Graph of spatial random-effect (school-level residual) from the multivariate, Bayesian**  
16 **hierarchical model for Hb.** Each point represents one school; the posterior mean is shown by the dot and  
17 the 95% BCI are represented by the error bars. The horizontal straight line in the middle of the graph  
18 represents the overall mean of the residuals, which are zero centred. Inset shows the school locations,  
19 shaded by the value of the school-level residual.

1  
2  
3  
4  
5  
6  
7 **Tables:**  
8

9 **Table 1** Definition of included anthropometric indicators, and population-based cut-off values for severity of  
10 malnutrition, as defined by the World Health Organization.  
11

| Anthropometric Measurement |                             | Severity of malnutrition (prevalence range for < 6 years) |                      |                    |
|----------------------------|-----------------------------|-----------------------------------------------------------|----------------------|--------------------|
|                            |                             | Low severity                                              | Medium/high severity | Very high severity |
| Stunting                   | Height-for-age Z-score > -2 | <20%                                                      | 20-40%               | >40%               |
|                            | SD                          |                                                           |                      |                    |
| Wasting                    | weight-for-height Z-score > | <5%                                                       | 5-15%                | >15%               |
|                            | -2 SD                       |                                                           |                      |                    |
| Underweight                | weight-for-age <i>or</i>    | <10%                                                      | 10-30%               | >30%               |
|                            | BMI-for-age Z-score > -2 SD |                                                           |                      |                    |

12  
13  
14  
15  
16  
17  
18  
19  
20  
21  
22  
23  
24  
25  
26  
27  
28  
29  
30  
31  
32  
33  
34  
35  
36  
37  
38  
39  
40  
41  
42  
43  
44  
45  
46  
47  
48  
49  
50  
51  
52  
53  
54  
55  
56  
57  
58  
59  
60

**Table 2** Mean Hb concentration according to infection status, nutritional proxies and other characteristics in 16,941 children aged 5-16 years (univariate analysis).

| Variable                                                 | Data type and source          | Children No (%) | Mean Hb shift, g/L (SE) | p      |
|----------------------------------------------------------|-------------------------------|-----------------|-------------------------|--------|
| <b>Sex</b>                                               |                               |                 |                         |        |
| Female                                                   | Individual – KHS              | 8,314 (49.1)    | (vs. female)            |        |
| Male                                                     | Individual – KHS              | 8,627 (50.9)    | - 1.36 (0.28)           | <0.001 |
| Age (in years)                                           | Individual – KHS              | -               | + 0.89 (0.11)           | <0.001 |
| <b>Socio-economic indicators</b>                         |                               |                 |                         |        |
| Educated household head <sup>1</sup>                     | Individual – KHS              | 8,333 (49.2)    | + 0.82 (0.41)           | 0.05   |
| Household owns a mobile phone                            | Individual – KHS              | 10,065 (59.4)   | + 1.42 (0.40)           | <0.001 |
| <b>SES quintile</b>                                      |                               |                 |                         |        |
| Lowest                                                   | Individual – KHS              | 3,272 (20.4)    | (vs. lowest)            |        |
| Mid (quintiles 2-4)                                      |                               | 9,926 (61.8)    | + 2.35 (0.50)           | <0.001 |
| Highest                                                  |                               | 2,854 (17.8)    | + 3.07 (0.82)           | <0.001 |
| Urban location                                           | School-level – digital UE map | 1,237 (7.3)     | 1.56 (1.52)             | 0.3    |
| <b>Current infections</b>                                |                               |                 |                         |        |
| <i>Malaria-P. falciparum</i> parasitaemic                | Individual – KHS              | 607 (3.6)       | -3.36 (0.77)            | <0.001 |
| Med/high intensity hookworm (>100 epg)                   | Individual – KHS              | 931 (5.5)       | -2.81 (0.69)            | <0.001 |
| Med/high intensity <i>S. haematobium</i> (>500 epg)      | Individual – KHS              | 799 (4.7)       | -3.81 (1.02)            | <0.001 |
| Usually sleeps under a net                               | Individual – KHS              | 9,763 (57.6)    | - 1.78 (0.52)           | 0.001  |
| Taken anthelmintic in previous 6 months                  | Individual – KHS              | 7,494 (44.2)    | + 1.24 (0.48)           | 0.01   |
| <b>Nutritional proxies</b>                               |                               |                 |                         |        |
| Wasting in under 5s (%) <sup>2</sup>                     |                               |                 |                         |        |
| Under 5%                                                 | Ecological – interpolated     | 4,027 (23.8)    | (vs <5%)                |        |
| 5-15%                                                    | from 2008 DHS                 | 10,257 (60.6)   | -5.58 (1.04)            | <0.001 |
| Over 15%                                                 |                               | 2,657 (15.7)    | -8.14 (1.21)            | <0.001 |
| Low BMI in adult women (%) <sup>3</sup>                  |                               |                 |                         |        |
| Under 20%                                                | Ecological – interpolated     | 12,867 (76.0)   | (vs. <20%)              |        |
| Over 20%                                                 | from 2008 DHS                 | 4,072 (24.0)    | -1.98 (0.80)            | 0.01   |
| Consumption iron rich foods in under 5s (%) <sup>4</sup> |                               |                 |                         |        |
| Under 25%                                                | Ecological – interpolated     | 14,572 (86.0)   | (vs. <25%)              |        |
| Over 25%                                                 | from 2008 DHS                 | 2,369 (14.0)    | + 1.07 (1.24)           | 0.4    |
| School-feeding (SF) status: <sup>5</sup>                 |                               |                 |                         |        |
| Not a SF district                                        | School-level – MoE registers  | 3,690 (21.8)    | (vs. not SF dist)       |        |
| SF district – no programme in school                     |                               | 8,417 (49.7)    | -7.34 (1.08)            | <0.001 |
| SF district – programme in school                        |                               | 4,834 (28.5)    | -4.80 (1.19)            | <0.001 |
| Generalised livelihood zone <sup>6</sup>                 |                               |                 |                         |        |
| Mixed farming                                            |                               | 3,295 (19.5)    | (vs. mixed)             |        |
| Pastoral and agro-pastoral                               | Ecological – FEWSNET          | 4,991 (29.5)    | + 1.11 (1.45)           | 0.4    |
| Riverine and fishing                                     |                               | 641 (3.8)       | + 2.08 (2.42)           | 0.4    |
| Medium potential farming                                 |                               | 4,073 (24.0)    | - 2.93 (1.13)           | 0.02   |
| High potential farming                                   |                               | 3,941 (23.3)    | + 1.37 (2.14)           | 0.2    |
| Food security status <sup>7</sup>                        |                               |                 |                         |        |
| Generally food secure                                    | Ecological – FEWSNET          | 2,756 (16.3)    | (vs. secure)            |        |
| Moderately food insecure                                 |                               | 7,755 (45.8)    | -3.20 (1.27)            | 0.01   |
| Highly food insecure                                     |                               | 6,048 (35.7)    | - 6.17 (1.25)           | <0.001 |
| Extremely food insecure                                  |                               | 382 (2.3)       | - 5.12 (1.52)           | 0.001  |

KSH; Kenya School Health survey (conducted 2008-2010). DHS; Kenya Demographic Health Survey conducted 2008/2009. MoE; Kenya Ministry of Education. FEWSNET; Famine early warning system network. SE; standard error.

<sup>1</sup> household head educated to primary complete or above (reported).

<sup>2,3,4</sup> Interpolated from Kenya 2008/2009 DHS survey

<sup>2</sup> school included in either the Homegrown School Meals Programme (HGSMP) or Emergency HGSMP 2010 registers

<sup>6</sup> based on the USAID/FEWSNET Generalised Livelihood Zone 2010 Classification for Kenya

<sup>7</sup> based on the USAID/FEWSNET Food Insecurity Severity Scale for the quarter corresponding to the KSH survey date.

Formatted: Font: Italic



**Table 3** Bayesian hierarchical multivariate regression model for haemoglobin levels.

| Variable                                                      | Mean Hb shift (g/L) | 95% BCI / SD    |
|---------------------------------------------------------------|---------------------|-----------------|
| Baseline haemoglobin                                          | 117.3               | (113.9, 120.5)  |
| Sex (male)                                                    | -1.53               | (-1.94, -1.13)  |
| Age (in years)                                                | +1.08               | (+0.99, +1.17)  |
| SES quintile (vs. quintiles 2-4)                              |                     |                 |
| lowest                                                        | -0.56               | (-1.14, +0.02)  |
| highest                                                       | 0.25                | (-0.31, +0.86)  |
| Med/high intensity <i>S. haematobium</i> (>500 epg)           | -1.75               | (-2.92, -0.60)  |
| Med/high intensity hookworm (>100 epg)                        | -1.03               | (-2.00, -0.02)  |
| <i>Malaria-P. falciparum</i> parasitaemic                     | -3.00               | (-4.29, -1.68)  |
| Med/high hookworm – <i>malaria-P. falciparum</i> co-infection | -5.56               | (-8.64, -2.67)  |
| Wasting in under 5s (vs <5% prevalence)                       |                     |                 |
| 5-15%                                                         | -4.39               | (-6.56, -2.09)  |
| >15%                                                          | -9.74               | (-12.16, -7.45) |
| School-feeding (SF) status:                                   |                     |                 |
| SF district – no programme in school                          | -2.14               | (-4.76, +0.46)  |
| SF district – programme in school                             | -2.78               | (-5.43, -0.21)  |
| <b>Random effect terms</b>                                    |                     |                 |
| Individual $\sigma^2$                                         | 183.6               | (2.02)          |
| Spatial $\sigma^2$ (school-level)                             | 29.5                | (7.93)          |
| Range of spatial correlation (km)                             | 194                 | (99,318)        |

Formatted: Font: Italic

Formatted: Font: Italic

**Table 4: Predicted adjusted population attributable risk fractions for key predictors across Kenya.** Estimates are based on the predicted numbers anaemic in each risk group given by the mean and individual-level standard deviations at each realisation of the Bayesian multivariate model for Hb, and are shown for two demographic groups by Province.

|                                 | Population Attributable Risk fractions by Province, % (95% BCI) |                     |                   |                   |                   |                     |
|---------------------------------|-----------------------------------------------------------------|---------------------|-------------------|-------------------|-------------------|---------------------|
|                                 | Central                                                         | Coast               | Eastern           | Nyanza            | Rift Valley       | Western             |
| <b>14 year old girls:</b>       |                                                                 |                     |                   |                   |                   |                     |
| Observed prevalence of anaemia  | 3.3                                                             | 37.3                | 34.7              | 30.8              | 19.4              | 25.0                |
| <b>PAF for:</b>                 |                                                                 |                     |                   |                   |                   |                     |
| Med/high intensity hookworm     | <i>n/a</i>                                                      | 13.0<br>(3.7, 23.1) | 5.9<br>(0, 12.5)  | 8.2<br>(0, 30.0)  | 5.0<br>(0, 12.5)  | 29.0<br>(1.4, 55.1) |
| Malaria                         | <i>n/a</i>                                                      | 5.8<br>(2.0, 10.4)  | <i>n/a</i>        | 27.6<br>(0, 49.1) | <i>n/a</i>        | 23.6<br>(0, 40.9)   |
| Schistosomiasis                 | <i>n/a</i>                                                      | 3.1<br>(0, 0.08)    | <i>n/a</i>        | <i>n/a</i>        | <i>n/a</i>        | <i>n/a</i>          |
| Acute malnutrition <sup>a</sup> | <i>n/a</i>                                                      | 18.5<br>(0, 37.9)   | 18.4<br>(0, 73.0) | <i>n/a</i>        | 16.0<br>(0, 52.5) | <i>n/a</i>          |
| <b>7 year old boys:</b>         |                                                                 |                     |                   |                   |                   |                     |
| Observed prevalence of anaemia  | 5.0                                                             | 43.3                | 23.2              | 43.2              | 22.4              | 19.2                |
| <b>PAF for:</b>                 |                                                                 |                     |                   |                   |                   |                     |
| Med/high intensity hookworm     | <i>n/a</i>                                                      | 5.6<br>(1.0, 10.3)  | <i>n/a</i>        | 11.0<br>(0, 21.6) | 3.4<br>(0, 6.6)   | 13.5<br>(0, 27.5)   |
| Malaria                         | <i>n/a</i>                                                      | 1.5<br>(0.3, 6.1)   | <i>n/a</i>        | 14.3<br>(0, 32.0) | <i>n/a</i>        | 15.8<br>(0, 28.1)   |
| Schistosomiasis                 | <i>n/a</i>                                                      | 0<br>(0, 5.5)       | <i>n/a</i>        | <i>n/a</i>        | <i>n/a</i>        | <i>n/a</i>          |
| Acute malnutrition <sup>a</sup> | <i>n/a</i>                                                      | 16.4<br>(0, 33.5)   | 16.4<br>(0, 67.1) | <i>n/a</i>        | 14.1<br>(0, 45.9) | <i>n/a</i>          |

<sup>a</sup> Exposure to "acute malnutrition", prevalence of wasting in under 5s exceeds 5%  
*n/a* – no children are exposed (i.e. prevalence of predictor is zero in this demographic group)
